# The Genetic Origin of the Indo-Europeans

Iosif Lazaridis<sup>1,2\*#</sup>, Nick Patterson<sup>1,3\*#</sup>, David Anthony<sup>1,4\*#</sup>, Leonid Vyazov<sup>5#</sup>, Romain Fournier<sup>6</sup>, Harald Ringbauer<sup>1,7</sup>, Iñigo Olalde<sup>1,8,9</sup>, Alexander A. Khokhlov<sup>10</sup>, Egor P. Kitov<sup>11</sup>, Natalia I. Shishlina<sup>12</sup>, Sorin C. Ailincăi<sup>13</sup>, Danila S. Agapov<sup>14</sup>, Sergey A. Agapov<sup>14</sup>, Elena Batieva<sup>15</sup>, Baitanayev Bauyrzhan<sup>16</sup>, Zsolt Bereczki<sup>17</sup>, Alexandra Buzhilova<sup>18</sup>, Piya Changmai<sup>5</sup>, Andrey A. Chizhevsky<sup>19</sup>, Ion Ciobanu<sup>20</sup>, Mihai Constantinescu<sup>21</sup>, Marietta Csányi<sup>22</sup>, János Dani<sup>23,24</sup>, Peter K. Dashkovskiy<sup>25</sup>, Sándor Évinger<sup>26</sup>, Anatoly Faifert<sup>27</sup>, Pavel N. Flegontov<sup>1,5,28</sup>, Alin Frînculeasa<sup>29</sup>, Mădălina N. Frînculeasa<sup>30</sup>, Tamás Hajdu<sup>31</sup>, Tom Higham<sup>32,33</sup>, Paweł Jarosz<sup>34</sup>, Pavol Jelínek<sup>35</sup>, Valeri I. Khartanovich<sup>36</sup>, Eduard N. Kirginekov<sup>37</sup>, Viktória Kiss<sup>38</sup>, Alexandra Kitova<sup>39</sup>, Alexey V. Kiyashko<sup>40</sup>, Jovan Koledin<sup>41</sup>, Arkady Korolev<sup>10</sup>, Pavel Kosintsev<sup>42,43</sup>, Gabriella Kulcsár<sup>38</sup>, Pavel Kuznetsov<sup>10</sup>, Rabadan Magomedov<sup>44</sup>, Mamedov Aslan Malikovich<sup>16</sup>, Eszter Melis<sup>38</sup>, Vyacheslav Moiseyev<sup>36</sup>, Erika Molnár<sup>17</sup>, Janet Monge<sup>45</sup>, Octav Negrea<sup>29</sup>, Nadezhda A. Nikolaeva<sup>46</sup>, Mario Novak<sup>47,48</sup>, Maria Ochir-Goryaeva<sup>49</sup>, György Pálfi<sup>17</sup>, Sergiu Popovici<sup>50</sup>, Marina P. Rykun<sup>51</sup>, Tatyana M. Savenkova<sup>52</sup>, Vladimir P. Semibratov<sup>53</sup>, Nikolai N. Seregin<sup>54</sup>, Alena Šefčáková<sup>55</sup>, Mussayeva Raikhan Serikovna<sup>16</sup>, Irina Shingiray<sup>56</sup>, Vladimir N. Shirokov<sup>57</sup>, Angela Simalcsik<sup>20,58</sup>, Kendra Sirak<sup>1,2</sup>, Konstantin N. Solodovnikov<sup>60</sup>, Judit Tárnoki<sup>22</sup>, Alexey A. Tishkin<sup>53</sup>, Viktor Trifonov<sup>61</sup>, Sergey Vasilyev<sup>62</sup>, Ali Akbari<sup>1,2</sup>, Esther S. Brielle<sup>1</sup>, Kim Callan<sup>2,63</sup>, Francesca Candilio<sup>64</sup>, Olivia Cheronet<sup>32,33</sup>, Elizabeth Curtis<sup>2,63</sup>, Olga Flegontova<sup>5,28</sup>, Lora Iliev<sup>2,63</sup>, Aisling Kearns<sup>2</sup>, Denise Keating<sup>65</sup>, Ann Marie Lawson<sup>2,63</sup>, Matthew Mah<sup>2,3,63</sup>, Adam Micco<sup>2</sup>, Megan Michel<sup>1,2,7,63</sup>, Jonas Oppenheimer<sup>2,63</sup>, Lijun Qiu<sup>2,63</sup>, J. Noah Workman<sup>2,63</sup>, Fatma Zalzala<sup>2,63</sup>, Anna Szécsényi-Nagy<sup>66</sup>, Pier Francesco Palamara<sup>6,67</sup>, Swapan Mallick<sup>2,3,63</sup>, Nadin Rohland<sup>2</sup>, Ron Pinhasi<sup>32,33#</sup>, David Reich<sup>1,2,3,63#</sup>

\* Contributed equally

# To whom correspondence should be addressed:

lazaridis@fas.harvard.edu, nickp@broadinstitute.org, AnthonyD@hartwick.edu, l.a.vyazov@gmail.com, ron.pinhasi@univie.ac.at, reich@genetics.med.harvard.edu

- 1 Department of Human Evolutionary Biology, Harvard University, Cambridge, MA, USA
- 2 Department of Genetics, Harvard Medical School, Boston, MA, USA
- 3 Broad Institute of Harvard and MIT, Cambridge, MA, USA
- 4 Hartwick College, Dept. of Anthropology, USA
- 5 Department of Biology and Ecology, Faculty of Science, University of Ostrava, Ostrava, Czechia
- 6 Department of Statistics, University of Oxford, Oxford, UK
- 7 Department of Archaeogenetics, Max Planck Institute for Evolutionary Anthropology, Leipzig, Germany
- 8 BIOMICs Research Group, Department of Zoology and Animal Cell Biology, University of the Basque Country UPV/EHU, Vitoria-Gasteiz, Spain
- 9 Ikerbasque-Basque Foundation of Science, Bilbao, Spain
- 10 Samara State University of Social Sciences and Education, Samara, Russia

- 11 Center of Human Ecology, Institute of Ethnology and Anthropology, Russian Academy of Science, Moscow, Russia
- 12 State History Museum, Department of Archaeology, Moscow, Russia
- 13 "Gavrilă Simion" Eco-Museum Research Institute, Tulcea, Romania
- 14 Samara Regional Public Organization "Historical, ecological and cultural Association "Povolzje"
- 15 Azov History, Archaeology and Palaeontology Museum-Reserve, Azov, Russia
- 16 Institute of Archaeology named after A.Kh Margulan, Almaty, Kazakhstan
- 17 Department of Biological Anthropology, Institute of Biology, University of Szeged, Szeged, Hungary
- 18 Research Institute and Museum of Anthropology, Moscow, Russia
- 19 Institute of Archeology named after A. Kh. Khalikov Tatarstan Academy of Sciences, Kazan, Russia
- 20 Orheiul Vechi Cultural-Natural Reserve, Institute of Bioarchaeological and Ethnocultural Research, Chişinău, Republic of Moldova
- 21 Fr. I Rainer Institute of Anthropology, University of Bucharest, Bucharest, Romania
- 22 Damjanich János Museum, Szolnok, Hungary
- 23 Department of Archaeology, University of Szeged, Szeged, Hungary
- 24 Déri Museum, 4026 Debrecen, Hungary
- 25 Department of Regional Studies of Russia, National and State-Confessional Relations, Altai State University, Barnaul, Russia
- 26 Hungarian Natural History Museum, Department of Anthropology, Budapest, Hungary
- 27 Research Institute GAUK RO "Don Heritage", Rostov-on-Don, Russia
- 28 Institute of Parasitology, Biology Centre of the Czech Academy of Sciences, České Budějovice, Czechia
- 29 Prahova County Museum of History and Archaeology, Ploieşti, Romania
- 30 Department of Geography, Faculty of Humanities, University Valahia of Târgovişte, Târgovişte, Romania
- 31 Eötvös Loránd University (Department of Biological Anthropology, Institute of Biology, Eötvös Loránd University, Budapest, Hungary
- 32 Department of Evolutionary Anthropology, University of Vienna, Vienna, Austria
- 33 Human Evolution and Archaeological Sciences, University of Vienna, Vienna, Austria
- 34 Department of Mountain and Highland Archaeology, Institute Archaeology and Ethnology Polish Academy of Science, Kraków, Poland
- 35 Slovak National Museum-Archaeological Museum, Bratislava, Slovak Republic
- 36 Peter the Great Museum of Anthropology and Ethnography, Department of Physical Anthropology, St. Petersburg, Russia
- 37 State Autonomous Cultural Institution of the Republic of Khakassia "Khakassian National Museum of Local Lore named after L.R. Kyzlasova", Republic of Khakassia, Abakan, Russia
- 38 Institute of Archaeology, HUN-REN Research Centre for the Humanities, Budapest, Hungary
- 39 Centre for Egyptological Studies of the Russian Academy of Sciences, Russian Academy of Sciences, Moscow, Russia

- 40 Department of Archaeology and History of the Ancient World of the Southern Federal University, Rostov-on-Don, Russia
- 41 Museum of Vojvodina, Novi Sad, Serbia
- 42 Department of History of the Institute of Humanities, Ural Federal University, Ekaterinburg, Russia
- 43 Institute of Plant and Animal Ecology, Urals Branch of the Russian Academy of Sciences, Yekaterinburg, Russia
- 44 Institute of History, Archaeology and Ethnography, Dagestan branch of the Russian Academy of Science, Makhachkala. Dagestan, Russia
- 45 Independent Researcher, 106 Federal Street, Philadelphia PA, USA
- 46 Department of General History, Historical and Literary Institute of the State University of Education, Ministry of Education Moscow, Moscow, Russia
- 47 Centre for Applied Bioanthropology, Institute for Anthropological Research, Zagreb, Croatia
- 48 Department of Archaeology and Heritage, Faculty of Humanities, University of Primorska, Koper, Slovenia
- 49 Kalmyk Scientific Centre of the Russian Academy of Sciences, Elista, Republic of Kalmykia, Russia
- 50 National Agency for Archaeology, Chişinău, Republic of Moldova
- 51 National Research Tomsk State University, Tomsk, Russia
- 52 V.F. Voino-Yasenetsky Krasnoyarsk State Medical University, Krasnoyarsk, Russia
- 53 Department of Archaeology, Ethnography and Museology, Altai State University, Barnaul, Russia
- 54 Laboratory of Ancient and Medieval Archaeology of Eurasia, Altai State University, Barnaul, Russia
- 55 Slovak National Museum-Natural History Museum, Bratislava, Slovak Republic
- 56 University of Oxford, Faculty of History, Oxford, United Kingdom
- 57 Center for Stone Age Archeology, Institute of History and Archaeology, Ural Branch of the Russian Academy of Sciences, Ekaterinburg, Russia
- 58 Olga Necrasov Centre for Anthropological Research, Romanian Academy, Iaşi Branch, Iaşi, Romania
- 59 Institute of Bioarchaeological and Ethnocultural Research, Chişinău, Republic of Moldova
- 60 Tyumen Scientific Center of the Siberian Branch of Russian Academy of Sciences, Institute of Problems of Northern Development, Tyumen, Russia
- 61 Institute for the History of Material Culture, Russian Academy of Sciences, St Petersburg, Russia
- 62 Russian Academy of Sciences, Institute of Ethnology and Anthropology, Moscow, Russia
- 63 Howard Hughes Medical Institute, Harvard Medical School, Boston, MA, USA
- 64 Museo delle Civiltà, Italian Ministry of Culture, Rome, Italy
- 65 School of Archaeology, University College Dublin, Ireland
- 66 Institute of Archaeogenomics, HUN-REN Research Centre for the Humanities, Budapest, Hungary
- 67 Wellcome Centre for Human Genetics, University of Oxford, Oxford, UK

**The Yamnaya archaeological complex appeared around 3300BCE across the steppes north of the Black and Caspian Seas, and by 3000BCE reached its maximal extent from Hungary in the west to Kazakhstan in the east. To localize the ancestral and geographical origins of the Yamnaya among the diverse Eneolithic people that preceded them, we studied ancient DNA data from 428 individuals of which 299 are reported for the first time, demonstrating three previously unknown Eneolithic genetic clines. First, a “Caucasus-Lower Volga” (CLV) Cline suffused with Caucasus hunter-gatherer (CHG) ancestry extended between a Caucasus Neolithic southern end in Neolithic Armenia, and a steppe northern end in Berezhnovka in the Lower Volga. Bidirectional gene flow across the CLV cline created admixed intermediate populations in both the north Caucasus, such as the Maikop people, and on the steppe, such as those at the site of Remontnoye north of the Manych depression. CLV people also helped form two major riverine clines by admixing with distinct groups of European hunter-gatherers. A “Volga Cline” was formed as Lower Volga people mixed with upriver populations that had more Eastern hunter-gatherer (EHG) ancestry, creating genetically hyper-variable populations as at Khvalynsk in the Middle Volga. A “Dnipro Cline” was formed as CLV people bearing both Caucasus Neolithic and Lower Volga ancestry moved west and acquired Ukraine Neolithic hunter-gatherer (UNHG) ancestry to establish the population of the Serechnii Stih culture from which the direct ancestors of the Yamnaya themselves were formed around 4000BCE. This population grew rapidly after 3750-3350BCE, precipitating the expansion of people of the Yamnaya culture who totally displaced previous groups on the Volga and further east, while admixing with more sedentary groups in the west. CLV cline people with Lower Volga ancestry contributed four fifths of the ancestry of the Yamnaya, but also, entering Anatolia from the east, contributed at least a tenth of the ancestry of Bronze Age Central Anatolians, where the Hittite language, related to the Indo-European languages spread by the Yamnaya, was spoken. We thus propose that the final unity of the speakers of the “Proto-Indo-Anatolian” ancestral language of both Anatolian and Indo-European languages can be traced to CLV cline people sometime between 4400-4000 BCE.**

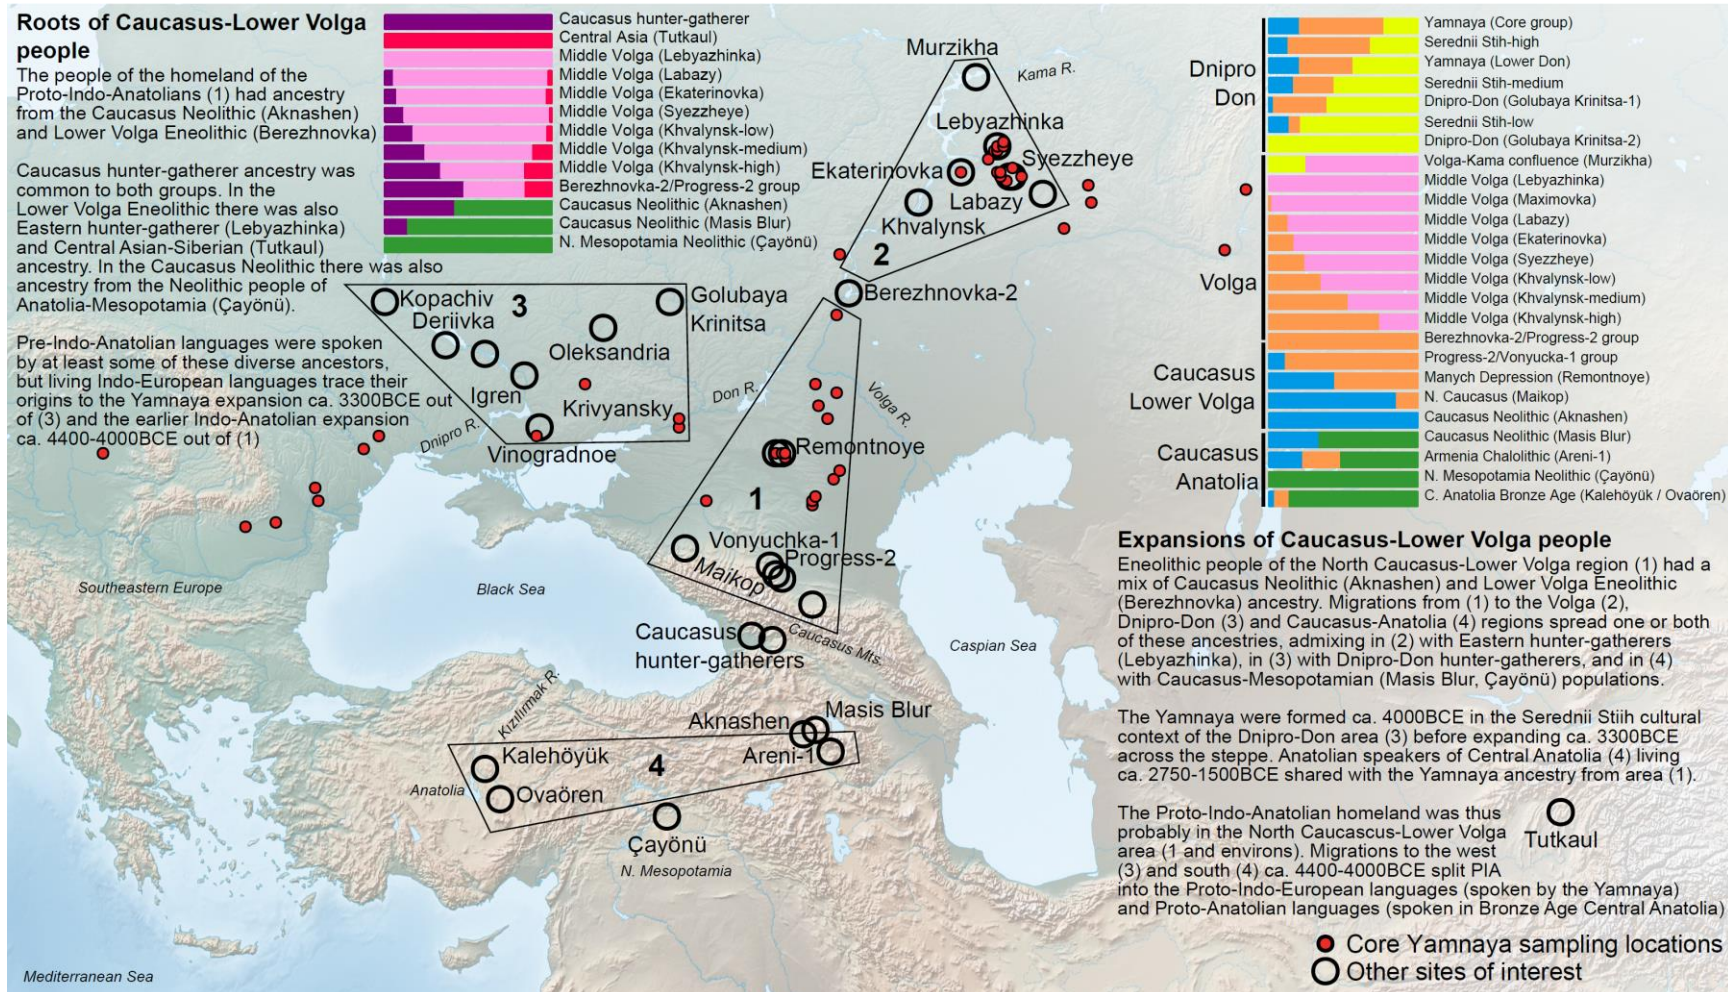

**Summary Figure: The origin of Indo-Anatolian and Indo-European languages.** Genetic reconstruction of the ancestry of Pontic-Caspian steppe and West Asian populations points to the North Caucasus-Lower Volga area as the homeland of Indo-Anatolian languages and to the Serednii Stih archaeological culture of the Dnipro-Don area as the homeland of Indo-European languages. The Caucasus-Lower Volga people had diverse distal roots, estimated using the *qpAdm* software on the left barplot, as Caucasus hunter-gatherer (purple), Central Asian (red), Eastern hunter-gatherer (pink), and West Asian Neolithic (green). Caucasus-Lower Volga expansions, estimated using *qpAdm* on the right barplot as disseminated Caucasus Neolithic (blue)-Lower Volga Eneolithic (orange) proximal ancestries, mixing with the inhabitants of the North Pontic region (yellow), Volga region (yellow), and West Asia (green).

## 1 Introduction

2 Between 3300-1500 BCE, people of the Yamnaya archaeological complex and their descendants,  
3 in subsequent waves of migration, spread over large parts of Eurasia, contributing to the ancestry  
4 of people of Europe, Central and South Asia, Siberia, and the Caucasus. The spread of Indo-  
5 European language and culture<sup>1-7</sup> transformed all these regions. Despite the centrality of the  
6 Yamnaya expansion to the human story of Bronze Age Eurasia, their ancestral origins are poorly  
7 understood. A first challenge has been the sparse sampling of the Yamnaya themselves across  
8 their enormous geographic distribution. The remarkable long-range mobility of the Yamnaya,  
9 quickly spreading over a vast region, adds further difficulties to tracing, from radiocarbon dating,  
10 the origins of their material culture and associated genetic profile. Nor can these origins be traced  
11 to the numerous earlier Eneolithic cultures that preceded the Yamnaya, and among whom their  
12 ancestors must be sought, as these have been sampled even more poorly and unsystematically.

13  
14 The first formal study of the origins of the Yamnaya identified two disparate sources of ancestry:  
15 a northern, “Eastern Hunter-Gatherer” (EHG) source from far eastern Europe, and a southern,  
16 West Asian source related to present-day Armenians.<sup>2</sup> The latter source was revealed, by ancient  
17 DNA, to be related to some of the region’s earliest inhabitants: Paleolithic-Mesolithic “Caucasus  
18 Hunter-Gatherers” (CHG) of Georgia,<sup>8</sup> and Neolithic people of the Zagros<sup>9</sup> and South  
19 Caucasus.<sup>6,10,11</sup> Additional discoveries further complicated the stories of both the northern and  
20 southern ancestors of the Yamnaya. First, it was noted that both CHG and EHG were part of an  
21 interaction sphere across the boundary between West Asia and eastern Europe,<sup>9</sup> suggesting the  
22 existence of intermediate populations and raising the question of when and where these came  
23 together to form the Eneolithic antecessors of the Yamnaya. Second, it was recognized that the  
24 steppe itself was an admixture zone of EHG with “Western Hunter-Gatherers” (WHG<sup>12</sup>).  
25 Mesolithic hunter-gatherers from Ukraine were succeeded by more WHG-admixed Neolithic  
26 hunter-gatherers in the Dnipro valley,<sup>13</sup> representing a local reshuffling within the European  
27 portion of a ~7,000km-long trans-Eurasian cline of boreal hunter-gatherers.<sup>14</sup> What was the  
28 relative contribution of the EHG (who were present in the Volga River at Lebyazhinka<sup>2</sup> ca. 5660-  
29 5535 BCE) and these more western Ukraine Neolithic hunter-gatherers (UNHG) of the Dnipro to  
30 later populations? Third, it was discovered that the Yamnaya had not only CHG-related, but also  
31 Anatolian Neolithic ancestry, absent in the early known steppe inhabitants, and derived from  
32 European farmer neighbors west of the steppe<sup>5</sup>. This ancestry was later shown to be of rather  
33 Anatolian-Levantine-Mesopotamian origin, and to be mediated not from Europe but from the  
34 Caucasus neighbors south of the steppe.<sup>6</sup> Such ancestry must have been added following the  
35 expansion of Neolithic farmers into the Caucasus, introduced thence into the steppe as a later  
36 exogenous element, distinct from the earlier CHG-related one. Finally, it was recognized that  
37 European steppe populations were formed not only by northern-southern admixture, but  
38 included, in at least some Eneolithic and Bronze Age people of the North Caucasus,  
39 contributions related to Siberians from further east.<sup>5</sup> What was the extent of the spread of this  
40 eastern ancestry and did the Yamnaya themselves possess it?

41  
42 Here we present a unified population genetic analysis of 372 newly reported individuals dating  
43 from 6400-2000 BCE, as well as increased quality data for 61 individuals. The present study  
44 serves as the formal technical report for 299 of the newly reported individuals and 55 of the  
45 individuals with increased quality data; more than 80% of the individuals are from Russia, but  
46 the dataset is also significant in including dozens of individuals from westward expansion of

47 Steppe cultures along the Danube (Supplementary Information, section 1, Online Table 1).  
48 Technical details of the 803 ancient DNA libraries that are the basis for the newly reported data  
49 (and an additional 195 libraries that failed our screening) are presented in Online Table 2, while  
50 details of 198 newly generated radiocarbon dates on these individuals are presented in Online  
51 Table 3. A parallel study<sup>15</sup> presents a combined archaeological and genetic analysis of population  
52 transformations in the North Pontic Region (Ukraine and Moldova) and serves as the formal  
53 report for the data from the other 73 of the newly analyzed individuals and the other 5  
54 individuals with increased quality data, with both studies co-analyzing the full dataset. We  
55 grouped individuals into analysis labels based on geographical and temporal information,  
56 archaeological context, and genetic clustering (Online Table 4 lists all individuals used for  
57 analyses, with their labels). The potential of the combined dataset for shedding light on this  
58 period can be appreciated from the fact that it adds 79 analyzed Eneolithic people from the  
59 steppe and its environs (from Russia or Ukraine, west of 60E longitude and south of 60N  
60 latitude, between 5000-3500BCE) to 82 published<sup>5,7,13,15-20</sup> and a total of 286  
61 Yamnaya/Afanasievo individuals compared to 75 in the literature.<sup>2,4-6,13,21-29</sup>

### 62 63 **Discovery of three pre-Bronze Age genetic clines that collapsed after Yamnaya expansion**

64  
65 Principal Component Analysis (PCA) of ancient individuals from the Pontic-Caspian steppe and  
66 adjacent areas of Southeastern Europe, the Caucasus and West Asia reveals that most of the  
67 Eneolithic people of the steppe as well as the later Bronze Age Yamnaya fall on non-overlapping  
68 genetic gradients (Figure 1). Visual impressions from a two-dimensional PCA must be evaluated  
69 cautiously, as populations at intermediate PCA positions, may not, in fact, be mixtures of more  
70 extreme ones, and the plot may suggest alternative ways of modeling each population of interest.  
71 For example, PC1 correlates (from left to right) to the differentiation between inland West  
72 Asians (Caucasus and Iran) to East Mediterranean (Anatolian-European) populations<sup>10</sup>, but also  
73 to the differentiation between Siberians and European hunter-gatherers<sup>14</sup>. On the other hand, PC2  
74 differentiates between Neolithic and earlier populations from northern Eurasia (top; including  
75 Europe and Siberia) and West Asia (bottom: Anatolia-Mesopotamia-Caucasus-Iran). The  
76 Eneolithic and Bronze Age populations occupy the middle of the PCA: how did the earlier  
77 groups surrounding them across these orthogonal directions combine to form them?

78  
79 To answer these questions in a statistically rigorous way, we implemented a new model  
80 competition tournament framework around qpWave/qpAdm methods<sup>2,30</sup> to fit and distinguish  
81 among alternative models (Methods; Supplementary Information, section 2). Briefly  
82 summarized, the idea of this methodology is that an admixture model  $X$  that includes a set of  
83 sources describes the admixture history of a target population  $T$  well if it: (i) reconstructs the  
84 shared genetic drift of  $T$  with both distant outgroup populations and the sources of alternative  
85 competing models, but also (ii) renders these competing models infeasible by showing that they  
86 cannot model this shared drift with the sources of  $X$ . In our framework, models are evaluated  
87 against a conservative set of distant outgroups as an initial filtering step; if they fit poorly, they  
88 are rejected; if not, they are further evaluated by comparing them against each other in  
89 symmetrical fashion (all-against-all) to identify a smaller set of promising models.

90  
91 With this note of caution, we observe that in the PCA in the Eneolithic-Bronze Age steppe there  
92 are three clines (geographically denoted as “Volga”, “Dnipro”, and “Caucasus-Lower Volga”),

93 which diverge, in PCA space, from an area that includes populations enclosed by the Lower Don  
94 (at the site of Krivyansky), Lower Volga (at Berezhnovka-2), and north Caucasus mountains (at  
95 Progress-2, Vonyuchka-1, and Sharakhalsun<sup>5</sup>). From these similar beginnings the three clines  
96 extend outward into distinct directions corresponding to their geographical neighbors: both  
97 towards the EHG and UNHG representing the pre-Eneolithic people that lived in the Volga-Don-  
98 Dnipro area of eastern Europe, and towards the CHG and Caucasus Neolithic representing the  
99 pre-Eneolithic people that lived in the Caucasus and West Asia. In what follows, we introduce  
100 the key populations of each of the three clines and show how these can be modeled in terms of  
101 proximate sources. We also infer the ancestry origins of the people of the three clines to discover  
102 what is shared among all of them and unique to each of them.

103  
104 *Volga Cline:* The “Volga Cline” consists of sites on waterways that drain into the Caspian Sea and  
105 is suggestive of a zone of ongoing human contact within its region. The Eneolithic individuals fall  
106 at positions that correlate extraordinarily well to their position on the Volga River as one moves  
107 downstream: the Volosovo-attributed Sakhtysh (in the Upper Volga) and Murzikha (near the  
108 Kama-Volga confluence)<sup>14</sup> constitute the upriver portion of the cline, situated in PCA space  
109 between EHG and UNHG. The Volga Cline then distinctly “bends” in PCA space and the knee of  
110 the cline is occupied by EHG groups, including those sampled in the northwest of Russia in  
111 Karelia<sup>2,19</sup> and those of the Middle Volga, suggesting that this widely dispersed set of hunter-  
112 gatherers, which has also been called the Sidelkino Cluster based on its oldest representative<sup>19,22</sup>  
113 were the major population of much of eastern Europe. Past the knee, in the downriver portion of  
114 the cline, the hunter-gatherer affinity decreases starting at the Middle Volga: Labazy, Lebyazhinka,  
115 Ekaterinovka, Syezzheye, then Khvalynsk (4500-4350 BCE) and Khlopkov Bugor, finally  
116 reaching the Lower Volga at Berezhnovka (4450-3960 BCE) (Fig. 1a). The decrease of hunter-  
117 gatherer affinity is counterbalanced by increased affinity towards populations of the Caucasus,  
118 suggesting that it is generated by an unsampled CHG-related source—that existed somewhere  
119 between Georgia (where the known CHG individuals were sampled<sup>8</sup>) and the Lower Volga—  
120 interacting with the northern EHG natives. Archaeological correlates for such south-north  
121 interactions do exist, and begin with the expansion of the Seroglazovo forager culture around the  
122 Lower Volga estuary ~6200 BCE, with some ceramic and lithic typological parallels with  
123 Caucasus cultures, and continue to the unsampled North Caucasus Neolithic cemetery dated ~4800  
124 BCE near Nalchik.<sup>31,32</sup>

125  
126 At the end of the cline, the four individuals from the newly reported Lower Volga site of  
127 Berezhnovka-2 can be grouped with the PG2004 individual of the Progress-2<sup>5</sup> site in the north  
128 Caucasus into a “Berezhnovka-2-Progress-2 cluster” (abbreviated to “BPgroup”). This proves  
129 that the CHG-related ancestry found at Progress-2 extended well into the steppe in the Lower  
130 Volga. The second individual from Progress-2 (PG2001) is grouped with another north Caucasus  
131 individual from Vonyuchka-1<sup>5</sup> into a related “Progress-2-Vonyuchka-1 cluster” (abbreviated as  
132 “PVgroup”). PVgroup and BPgroup are distinct ( $p=0.0006$ ), but their genetic differentiation was  
133 small in magnitude ( $F_{ST}=-0.002\pm 0.002$ ; Extended Data Table 1) suggesting movement between  
134 the north Caucasus piedmont and Lower Volga sites. The two locations also shared a distinctive  
135 burial pose on the back with raised knees, later typical of Yamnaya and currently dated earliest  
136 in the Samara region at Lebyazhinka-5 and in a few graves at Ekaterinovka dated before 4500  
137 BCE. It is clear from the PCA (Fig. 1b) that BPgroup differs from PVgroup in that the former is  
138 shifted towards the Afontova Gora-3 Upper Paleolithic individual from Siberia,<sup>33</sup> West Siberian



139 hunter-gatherers,<sup>4</sup> and Central Asians such as a 7,500-year old Neolithic individual from Tutkaul  
140 (TTK) in Tajikistan.<sup>19</sup> We will see below that Siberian/Central Asian ancestry was one of the  
141 constitutive elements of the Lower Volga-North Caucasus Eneolithic population represented by  
142 the two groups.

143  
144 A natural interpretation of the Volga cline is that upriver EHG-related ancestors and downriver  
145 Berezhnovka-related ones came together to form communities along the length of the river,  
146 resulting in a highly variable set of sampled individuals along the genetic gradient. While the  
147 origin of the upriver EHG ancestry is clear, as it has antecedents in eastern Europe for thousands  
148 of years,<sup>19</sup> that of the downriver Berezhnovka group is less so, as (i) no earlier individuals from  
149 the Lower Volga have been sequenced, (ii) the genetic position of the Berezhnovka people is  
150 distinct from that of all preceding groups, and (iii) the BPgroup cannot be modeled as a clade  
151 with any contemporary or earlier groups ( $p < 0.001$ ). Whatever the origin of BPgroup, a point to  
152 which we will return below, we can use it as a proximate source and test Volga cline populations  
153 and individuals for consistency with a history of mixture of people related to the BPgroup and  
154 EHG (using Karelia<sup>2,19</sup> as an EHG source well outside the Volga area and unlikely to be part of  
155 the riverine mating network), as suggested by the PCA. Seven Volga cline populations fit this  
156 model ( $p$ -values of 0.04 to 0.72) with the only consistently poor fits for Upper Volga, Murzikha,  
157 Maximovka, and “Klo” (the Khvalynsk individuals with low Berezhnovka relatedness) ( $p$ -values  
158 of  $1e-66$  to 0.006). Three of these populations (other than Klo which we discuss below) are  
159 arrayed in the upriver portion of the Volga cline, before its PCA “bend” (from EHG towards the  
160 UNHG). Individuals along the downriver portion of the cline can be well-modeled with only the  
161 two sources (BPgroup and EHG) (Fig. 1c).

162  
163 People on the Volga Cline buried at the Ekaterinovka cemetery likely died between 5050-4450  
164 BCE (based on radiocarbon dates on three herbivore bones including a domesticated sheep in the  
165 graves of individuals we analyzed that are not expected to be affected by marine reservoir  
166 effects; Online Table 1). The Ekaterinovka people were already in the process of mixing with  
167 BPgroup-related people from the Lower Volga ( $24.3 \pm 1.3\%$  on average). This contrasts to the  
168 earlier hunter-gatherer from Lebyazhinka, who had the lowest estimate of Berezhnovka ancestry  
169 on the Volga Cline of only  $7.9 \pm 3.6\%$ , providing a baseline of this component prior to the  
170 Eneolithic and which can also be modeled with only EHG-related ancestry ( $p = 0.21$ ) while  
171 Ekaterinovka cannot ( $p = 2e-4$ ). Mixing intensified over time so that 100-200 years later at the site  
172 of Khvalynsk<sup>34</sup> which is ~120km from Ekaterinovka (date range of 4500-4350 BCE based on  
173 two herbivore bones in the graves of individuals we analyzed), we observe a continuous gradient  
174 of admixture which we divide for convenience into three groups: “Khavlynsk high (Khi)”  
175 ( $76.8 \pm 1.9\%$  BPgroup), “Khvalynsk medium (Kmed)” ( $57.3 \pm 1.7\%$  BPgroup), and “Khalynsk low  
176 (Klo)” ( $41.2 \pm 1.6\%$  BPgroup). Individuals on the downriver portion of the Volga cline exhibited  
177 a range of Berezhnovka ancestry from ~14-89% (Fig. 1c) and thus were not clearly dominated by  
178 either the old EHG ancestors of the region or the Lower Volga newcomers. Genetic  
179 differentiation between Lower Volga (BPgroup) and Ekaterinovka was strong ( $F_{ST} = 0.030 \pm 0.001$ ;  
180 Extended Data Table 1) and quite probably reflected at least two different linguistic-cultural  
181 communities interacting with each other.

182  
183 A genetically Volga Cline individual not from the Volga Basin is from Csongrád-Kettőshalom in  
184 Hungary, whose direct date is 4331-4073 cal BCE. This individual is estimated to have

185 87.9±3.5% of its ancestry from the BPgroup (Fig. 1c) comparable to the most extreme  
186 “Khvalynsk high” individuals. The Csongrád individual is one among a group of steppe-like  
187 graves that appeared in Southeastern Europe in the late 5<sup>th</sup> millennium BCE including a cemetery  
188 at Giurgiulești,<sup>35</sup> Moldova, from which one individual (I20072; 4330-4058BCE) is consistent  
189 with being a clade (p=0.90) with BPgroup, and another cemetery at Mayaky, Ukraine.<sup>36</sup>  
190 Archaeological analysis has documented long-distance movement of Balkan copper to the  
191 Volga-Cline site of Khvalynsk,<sup>34</sup> and the Csongrád and Mayaky individuals were plausibly part  
192 of the cultural exchange that mediated this process—a process our results show has no evidence  
193 of being contributed to genetically by people with ancestry typical of the Dnipro and Don basins.  
194 As we will now see, migrants with ancestry from the Lower Volga Eneolithic populations at the  
195 southern extreme of the Volga Cline did settle in the Dnipro area and generated the second major  
196 cline of the steppe.

197  
198 **Figure 1: Three Eneolithic clines and their neighbors in space and time.** (a) Map with  
199 analyzed sites. (b) PCA analysis using axes formed by a set of ancient West European hunter-  
200 gatherer (WHG), Siberian, West Asian, and European farmer populations. Selected individuals  
201 relevant to this study are projected<sup>37</sup> (Methods). (c) qpAdm models fitted on individuals of the  
202 populations of the three clines. The Volga Cline is generated by admixture between Lower Volga  
203 (BPgroup) people with upriver Eastern hunter-gatherers (EHG). Populations of the Dnipro  
204 Cline have UNHG or UNHG+EHG admixture relative to the Core Yamnaya (the hunter-  
205 gatherer source along this cline is significantly variable). The Caucasus-Lower Volga Cline is  
206 generated by admixture between lower Volga people with those from the Neolithic Caucasus  
207 (Aknashen-related).

208  
209

a

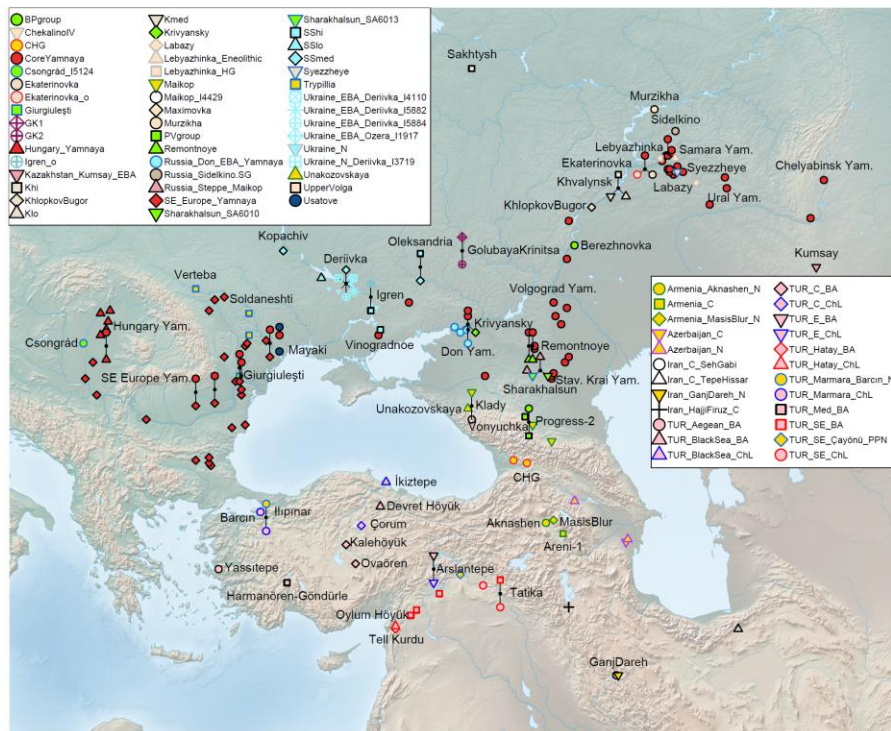

c

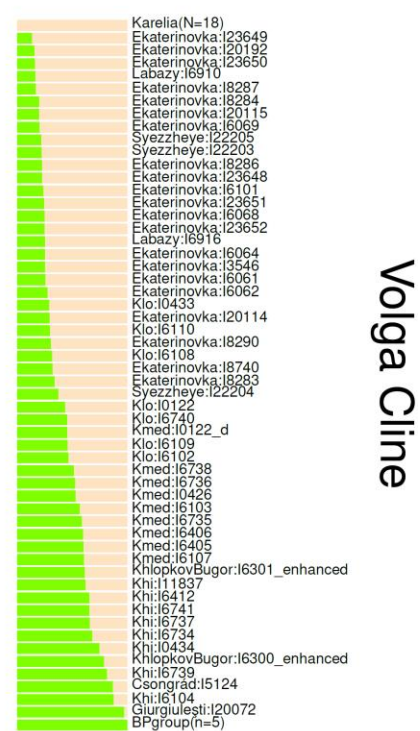

Volga Cline

b

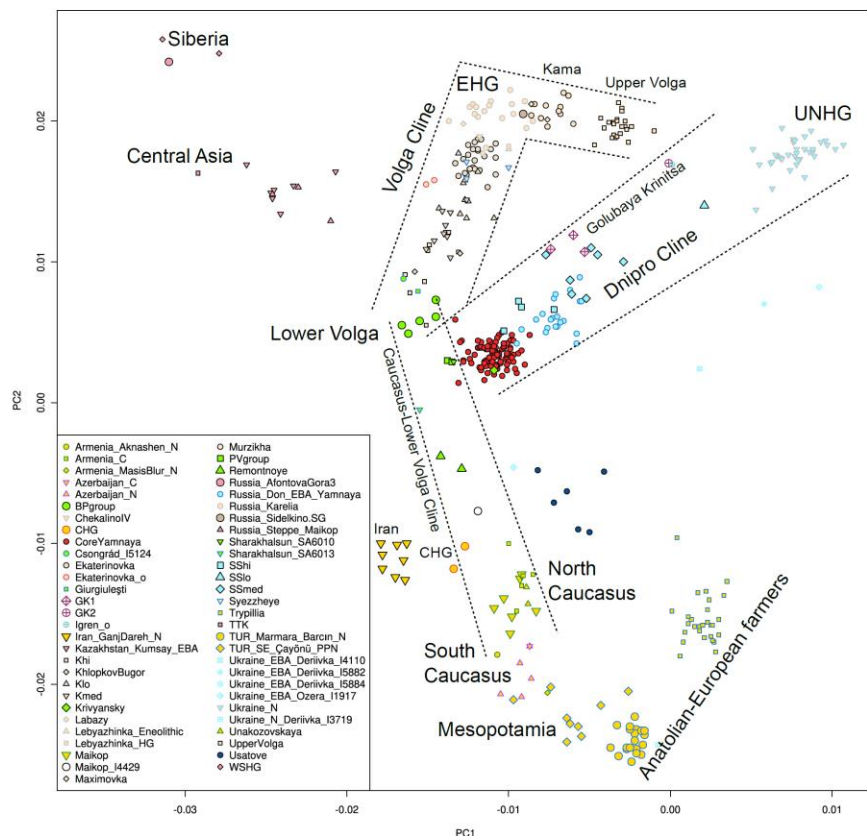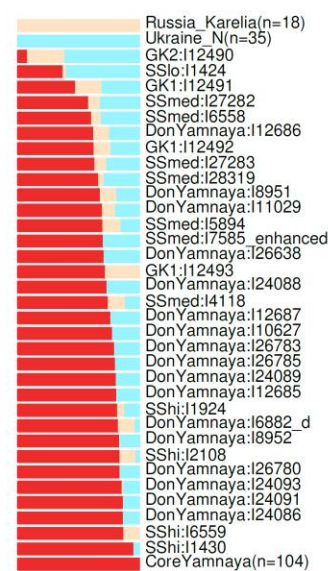

Dnipro Cline

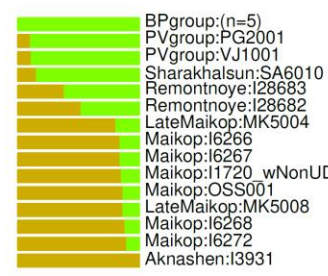

CLV Cline

211 *(2) Dnipro Cline:* The Dnipro Cline is formed at one end by Neolithic individuals living along  
212 the Dnipro River rapids whose union of calibrated radiocarbon dates is 6242-4542 BCE  
213 (UNHG), and at the other end by the Serechnii Stih population represented by 13 individuals with  
214 good quality data whose union of radiocarbon date ranges uncorrected for freshwater reservoir  
215 effects are 4996-3372 BCE. The Dnipro Cline also includes the great majority of later Yamnaya  
216 individuals who expanded widely, most of whom are from a genetically homogeneous subset,  
217 and we used a large group of these individuals that have high quality data (n=104) to represent  
218 “Core Yamnaya” (Supplementary Information, section 2). Close to the Core Yamnaya in PCA  
219 are two Eneolithic groups: the Serechnii Stih individual from Krivyansky in the Lower Don  
220 (4359-4251 BCE), and the PVgroup from the north Caucasus we discussed above as related to  
221 the Berezhnovka Lower Volga population. Nonetheless, the Core Yamnaya cannot be modeled  
222 as derived from either of these two earlier sources or indeed any other single source ( $p < 1e-4$ ).  
223 Their ancestry must have involved some admixture as their position along the highly variable  
224 Dnipro/Serechnii Stih-associated cline also suggests. People from the Dnipro Cline as a whole are  
225 also fully distinct from those of the Volga Cline in PCA, and no pair of populations from the  
226 Volga and Dnipro clines form a genetic clade ( $p < 1e-7$ ). This distinctiveness spans a period of  
227 three millennia, beginning with earlier groups from Ukraine (UNHG), continuing with those of  
228 the Eneolithic Serechnii Stih culture, and ending with the Yamnaya at the beginning of the Bronze  
229 Age, documenting the distinctiveness of the communities of these two great eastern European  
230 rivers and the relative lack of migration between them. A more geographically localized  
231 Yamnaya population of the Lower Don (n=23), many (n=17) of which are from the site of  
232 Krivyansky, bear no affinity to the Eneolithic individual from the area (Fig. 1). The Yamnaya  
233 can thus be traced neither to the north Caucasus (PVgroup), nor to the Lower Don (Krivyansky),  
234 nor to the Volga (BPgroup and the rest of the Volga cline). Yet, their position on the Dnipro  
235 cline, generated by populations of UNHG ancestry suggests that they emerged there, as a  
236 descendant community of people of the Serechnii Stih culture.

237  
238 The genetic heterogeneity of the Serechnii Stih contrasts with the homogeneity of the Core  
239 Yamnaya (Fig. 1) which occupies one end of the Dnipro cline. The Core Yamnaya homogeneity  
240 is remarkable given that this cluster includes individuals sampled across 5,000 km from Hungary  
241 to southern Siberia, a vast slice of Eurasia across which the Yamnaya expanded but, for whatever  
242 reason, hardly admixed, at least initially, and at least for the elite subset of people afforded burial  
243 in kurgans, with any of the people that previously occupied it. Individuals of the Serechnii Stih  
244 culture are arrayed along the Dnipro Cline with individuals of high or low Yamnaya affinity  
245 found at different sites. Closest to the Core Yamnaya genetically is a Serechnii Stih individual  
246 from Vinogradnoe from the coast of the Azov Sea which we group with two other individuals  
247 from Oleksandria and one from Igren into an “SShi” cluster of greatest Yamnaya affinity. The  
248 sampled SShi group does not form a clade with the Core Yamnaya ( $p = 2 \times 10^{-7}$ ). A female from  
249 Kopachiv (I7585)<sup>38</sup>, represented by a long bone found loose in a Trypillia phase BI-II settlement,  
250 is part of a second “SSmed” cluster that is further along the Dnipro Cline; this group also  
251 includes three individuals from Oleksandria and three from Deriivka. The SShi and SSmed  
252 subsets are largely contiguous with each other, but individual I1424 from Moliukhiv Bugor  
253 (“SSlo”) is much further apart and close to the UNHG. The true variation within the Serechnii  
254 Stih plausibly included individuals that fill gaps along the cline, e.g., between SSlo and SSmed,  
255 and even extended beyond the sampled variation, occupying the position of the Core Yamnaya  
256 itself. The Don Yamnaya largely overlap the Serechnii Stih individuals, and the Don Yamnaya are

257 discontinuous with the earlier Eneolithic individual from that location ( $p=7e-15$ ). An interesting  
258 material correlate is seen in settlement continuity at stratified sites of the Konstantinovka culture  
259 on the Lower Don where the Don Yamnaya continued to settle in the same place as the earlier  
260 Serechnii Stih, a continuity not seen in the Volga-Ural steppes, where most Eneolithic settlement  
261 sites exhibited no re-use by the Yamnaya.

262  
263 *qpAdm* analysis reveals that all groups visually on the Dnipro Cline in the PCA can be well  
264 modeled with either UNHG or GK2 (individual I12490 from Golubaya Krinitza in the Middle  
265 Don dated 5610-5390 BCE) at one extreme, and Core Yamnaya on the other ( $p$ -values between  
266 0.07 and 0.85). Some populations of the cline (SSmed) can be modeled as Core Yamnaya and  
267 either GK2 ( $p=0.43$ ) or UNHG ( $p=0.27$ ); others, like the Don Yamnaya, can be modeled only as  
268 Core Yamnaya and UNHG ( $p=0.08$ ) but not GK2 ( $p=0.0001$ ); and others, like SShi, as Core  
269 Yamnaya and GK2 ( $p=0.08$ ) but not UNHG ( $p=0.003$ ). Thus, the hunter-gatherer end of the  
270 Dnipro Cline is not clearly UNHG or GK2. We therefore model individuals of the Cline with  
271 ancestry from any population from the UNHG-EHG cline (Fig. 1c), observing that individuals  
272 can be modeled as a mix in which UNHG ancestry predominates but EHG ancestry is also  
273 present in individuals (similar to GK2). This reflects the admixture of Caucasus-Lower Volga  
274 ancestry with hunter-gatherers of the Dnipro-Don (or UNHG-GK2) area, rather than other areas  
275 of eastern Europe (such as the Volga area) in which the hunter-gatherer population was EHG.  
276 Using Core Yamnaya as a source for the Serechnii Stih is, of course, ahistorical, as they postdate  
277 the Serechnii Stih, and so the model of Core Yamnaya + UNHG/GK2 admixture must be  
278 interpreted as admixture between local Neolithic residents of the Dnipro-Don area with a second,  
279 unsampled, Eneolithic source, which together account for the ancestry of the Core Yamnaya  
280 and—with even more UNHG/GK2 ancestry—of the Dnipro cline as a whole.

281  
282 The Don, situated geographically between the Dnipro and Volga, is represented in our data by  
283 individuals from Golubaya Krinitza (in the Middle Don) and Krivyansky (in the Lower Don).  
284 Golubaya Krinitza contained two archaeologically contrasting styles of graves, one compared to  
285 Dnipro Neolithic graves and the other like Serechnii Stih.<sup>39</sup> The GK2 individual can be modeled  
286 as  $66.6\pm 4.7\%$  UNHG and  $33.4\pm 4.7\%$  EHG ( $p=0.39$ ), suggesting that intermediate populations  
287 between the Dnipro hunter-gatherers (represented by UNHG) and the EHG existed not only in  
288 the Upper Volga (the upriver portion of the Volga cline), but also in the Middle Don. When we  
289 examine populations using the most ancient sources (Karelia, UNHG, and CHG) of the steppe  
290 and Caucasus, we see that the Eneolithic population of the Lower Don at Krivyansky and  
291 Neolithic individuals from Golubaya Krinitza can all be well modeled with variable proportions  
292 of CHG-related ancestry (Fig. 2a). The most CHG-related ancestry is seen at Krivyansky  
293 ( $58.9\pm 2.4\%$ ); there is less ( $25.3\pm 2.1\%$ ) in three individuals which (Fig. 1) we group as GK1; and  
294 individual GK2 is consistent with having none or very little ( $4.0\pm 2.2\%$ ), fitting the simpler  
295 EHG+UNHG model mentioned above. Thus, the Neolithic and Eneolithic individuals of the Don  
296 were a mixture of European hunter-gatherer ancestries (intermediate between the Dnipro-  
297 sampled UNHG and the Volga-sampled EHG, paralleling the intermediate geographic position  
298 of the Don) and southern CHG-related ancestry (Fig. 2a). When did the CHG-related ancestry  
299 reach the Don area? Its presence in a <sup>14</sup>C-dated individual of the GK1 group (I12491/5557-5381  
300 BCE) and others from the region<sup>7</sup> suggest it was present there as early as the Neolithic. However,  
301 its absence from GK2 of similar <sup>14</sup>C age proves that it was not a general feature of the Neolithic  
302 population. Both GK1/GK2 dates may be too early given that archaeologists of Golubaya

303 Krinitisa interpreted people of the site as in contact with people of the much later Eneolithic  
304 Serednii Stih Culture.<sup>40</sup> Moreover, an outlier Serednii Stih individual from Igren (I27930; 4337-  
305 4063 cal BCE) is consistent with all its ancestry coming from GK2; this could be an example of  
306 long-distance migration from the Don to the Dnipro, but also casts some doubt on the much older  
307 date of the GK2 individual, as genetic identity across more than a millennium in two different  
308 locations seems implausible given the diverse admixtures taking place throughout the steppe  
309 during the Eneolithic. The interpretation of the Golubaya Krinitisa population is further  
310 complicated by uncertainties as to their date due to freshwater reservoir effects in individuals  
311 who have a diet heavily reliant on freshwater fish. This can make nominal dates up to a  
312 millennium too old in this region.<sup>41</sup> Further sampling along the Don would shed light on the  
313 distinctive processes and temporality of the ancestry change along this major river and place both  
314 the Golubaya Krinitisa individuals and those of Krivyansky on the Don mouth in their proper  
315 context.

316  
317 It has been suggested<sup>7</sup> that the Yamnaya were formed by a substantial contribution of ~65%  
318 Golubaya Krinitisa people from the Middle Don, that already had ~20-30% CHG-related  
319 ancestry, with an additional ~35% CHG-related ancestry. This scenario implies that they were  
320 formed in the Don area as the result of the CHG-related admixture observed there. Our results  
321 contradict this as the Core Yamnaya do not fit models with CHG-related and either GK1/GK2  
322 sources ( $p < 1e-6$ ), suggesting that they have ancestry not accounted for by the model of ref.<sup>7</sup> To  
323 understand the source of this ancestry, we fit the model of Fig. 2a (with the most ancient sources:  
324 Karelia, UNHG, and CHG) and observed that its failure ( $p = 2 \times 10^{-20}$ ) is explained by the fact that  
325 it severely underestimates their shared genetic drift with both Afontova Gora-3 from Upper  
326 Paleolithic Siberia ( $Z = -5.2$ ) and Anatolian Neolithic ( $Z = -6.8$ ).<sup>6</sup> Thus, the Yamnaya must have  
327 Siberian- and Anatolian-related ancestry and cannot be a simple mixture of Caucasus- and  
328 Middle Don hunter-gatherers. A Volga source of the Siberian-related ancestry is strongly  
329 suggested by the fact that the Volga cline is shifted away from the Dnipro cline precisely in the  
330 direction of Siberian populations (Fig. 1b). That the Volga cline populations had such ancestry is  
331 proven by the fact that the model of Fig. 2a fails them precisely for the same reason as it does the  
332 Core Yamnaya as it also underestimates shared drift with Afontova Gora-3, e.g., for BPgroup  
333 ( $p = 1 \times 10^{-8}$  and  $Z = -4.5$ ). This extra ancestry in BPgroup is also affirmed positively by the fact that  
334 it can be modeled as a mixture of Krivyansky and ~24% Central Asian (Siberian-related)  
335 Tutkaul<sup>19</sup> ancestry ( $p = 0.13$ ). When we fit both Krivyansky and the BPgroup with the same  
336 model that includes all relevant ancestries (Fig. 2b)—CHG, GK2, and Tutkaul—we see that  
337 indeed Krivyansky has little to no Central Asian ancestry ( $5.1 \pm 3.6\%$ ) but it can be fitted as  
338  $56.7 \pm 2.6\%$  CHG-related and  $43.3 \pm 2.6\%$  GK2 alone ( $p = 0.37$ ), while BPgroup does have  
339  $29.3 \pm 2.2\%$  Tutkaul ancestry. The model of Fig. 2b corrects for the missing Siberian-related  
340 ancestry in the Yamnaya, predicting shared genetic drift with Afontova Gora-3 reasonably  
341 accurately ( $Z = -1.7$ ), but still fails ( $p = 1e-9$ ) as it does not predict shared drift with Anatolian  
342 Neolithic ( $Z = -6.1$ ). Thus, while ancestry from the Volga can explain the Siberian relatedness of  
343 the Core Yamnaya it cannot explain the Anatolian Neolithic relatedness as this was not a  
344 component of Volga cline populations.

345  
346 Our new data resolve the extent of the spread of eastern “Central Asian” or “Siberian” ancestry  
347 into the Pontic-Caspian steppe. It was present, during the Eneolithic, on the Volga and in the  
348 North Caucasus Steppe, but further west on the Don there still existed populations without much

349 or any of it like those at Krivyansky and Golubaya Krinitisa. When we repeat our modeling of the  
350 Volga Cline as a mixture of BPgroup and EHG sources but add either a western (UNHG) or  
351 eastern (Tutkaul) source (Fig. 2c,d) we see that individuals on the cline remain largely well-  
352 modeled as linear combinations of the two groups: Fig. 2c shows the characteristic “bend” of the  
353 Volga Cline with a portion showing variable Berezhnovka ancestry and the other (including  
354 many individuals from the Upper Volga and Murzikha) showing variable UNHG ancestry which  
355 increases further still in the GK2 individual from the Don. Fig. 2d shows that individuals of the  
356 Volga Cline have more Tutkaul ancestry than is explained by the simpler Berezhnovka-Karelia  
357 model; however, the deviations are small ( $4.4 \pm 2.6\%$  Tutkaul ancestry for “Khi”). The Eneolithic  
358 Volga was an admixture zone between downriver BPgroup people with upriver EHG ones that  
359 included Central Asian ancestry mainly via BPgroup. Crucially, the Core Yamnaya fail all  
360 models of Fig. 2a-d ( $p < 1e-8$ ), and thus its origins must include a different blend of ancestry than  
361 the CHG-EHG-UNHG-Tutkaul ancestries involved in these models. As we will now see, this  
362 ancestry came from a third cline formed between the Caucasus Neolithic populations and those  
363 of the Lower Volga.

364  
365 **Figure 2. The three Eneolithic clines in the context of Eneolithic and Bronze Age admixture.**  
366 *Six 3-source models elucidate a complex history of admixture. Individuals plotted at the triangle*  
367 *edge fit ( $p > 0.05$ ); the simpler 2-source model is plotted for individuals with a negative*  
368 *coefficient from one of the three sources. The corners of each triangle represent the sources.*  
369 *Unplotted individual all give fits at  $P < 0.05$  and so should be viewed as poorly described by the*  
370 *model. (a) Caucasus and European hunter-gatherer admixtures in the “Old Steppe”: Krivyansky*  
371 *on the Lower Don received much more CHG-related admixture than upriver people of the*  
372 *Middle Don at Golubaya Krinitisa. In the Middle and Upper Volga and the Kama River,*  
373 *populations belonged to the old EHG cline with negligible CHG-related influence. (b) The*  
374 *“Don-Volga” difference. On the Lower Volga and North Caucasus piedmont, the BPgroup did*  
375 *receive CHG-related ancestry like its western Lower Don counterpart at Krivyansky; but, unlike*  
376 *Krivyansky, it also received ancestry from Central Asia; this eastern influence was higher still in*  
377 *the Bronze Age Steppe Maikop. (c) The “Volga Cline” vis-à-vis the Don: populations at*  
378 *Khvalynsk, Klopkov Bugor, and Ekaterinovka are clinal between the Berezhnovka cluster on the*  
379 *Lower Volga and the upriver EHG-like populations of the Middle Volga (Labazy and*  
380 *Lebyazhinka). (d) the “Volga Cline” vis-à-vis Central Asia: a slight excess of Central Asian*  
381 *ancestry in the Khi subset of Khvalynsk. (e) the “Dnipro” cline: the Core Yamnaya are on one*  
382 *end of a cline that also includes the Don Yamnaya and Serebnii Stih populations. The cline is*  
383 *formed by admixture from the “Caucasus-Lower Volga” (CLV) cline that is formed by*  
384 *differential admixture of Neolithic Caucasus and BPgroup people. The CLV Cline includes*  
385 *diverse people buried in kurgans at Berezhnovka, Progress-2, Remontnoye, and Maikop sites*  
386 *Klady and Dlinnaya-Polyana ~5000-3000 BCE. (f) “West Asian”: CLV ancestry first appears in*  
387 *the Chalcolithic population at Areni-1 in Armenia and is also present in the Bronze Age at*  
388 *Maikop. The majority of the ancestry in both populations is from West Asian sources from the*  
389 *Mesopotamia-Caucasus (or Çayönü-Masis Blur-Aknashen) cline. Chalcolithic and Bronze Age*  
390 *Anatolians lack CLV ancestry but traces of it can be found in Bronze Age Central Anatolians.*

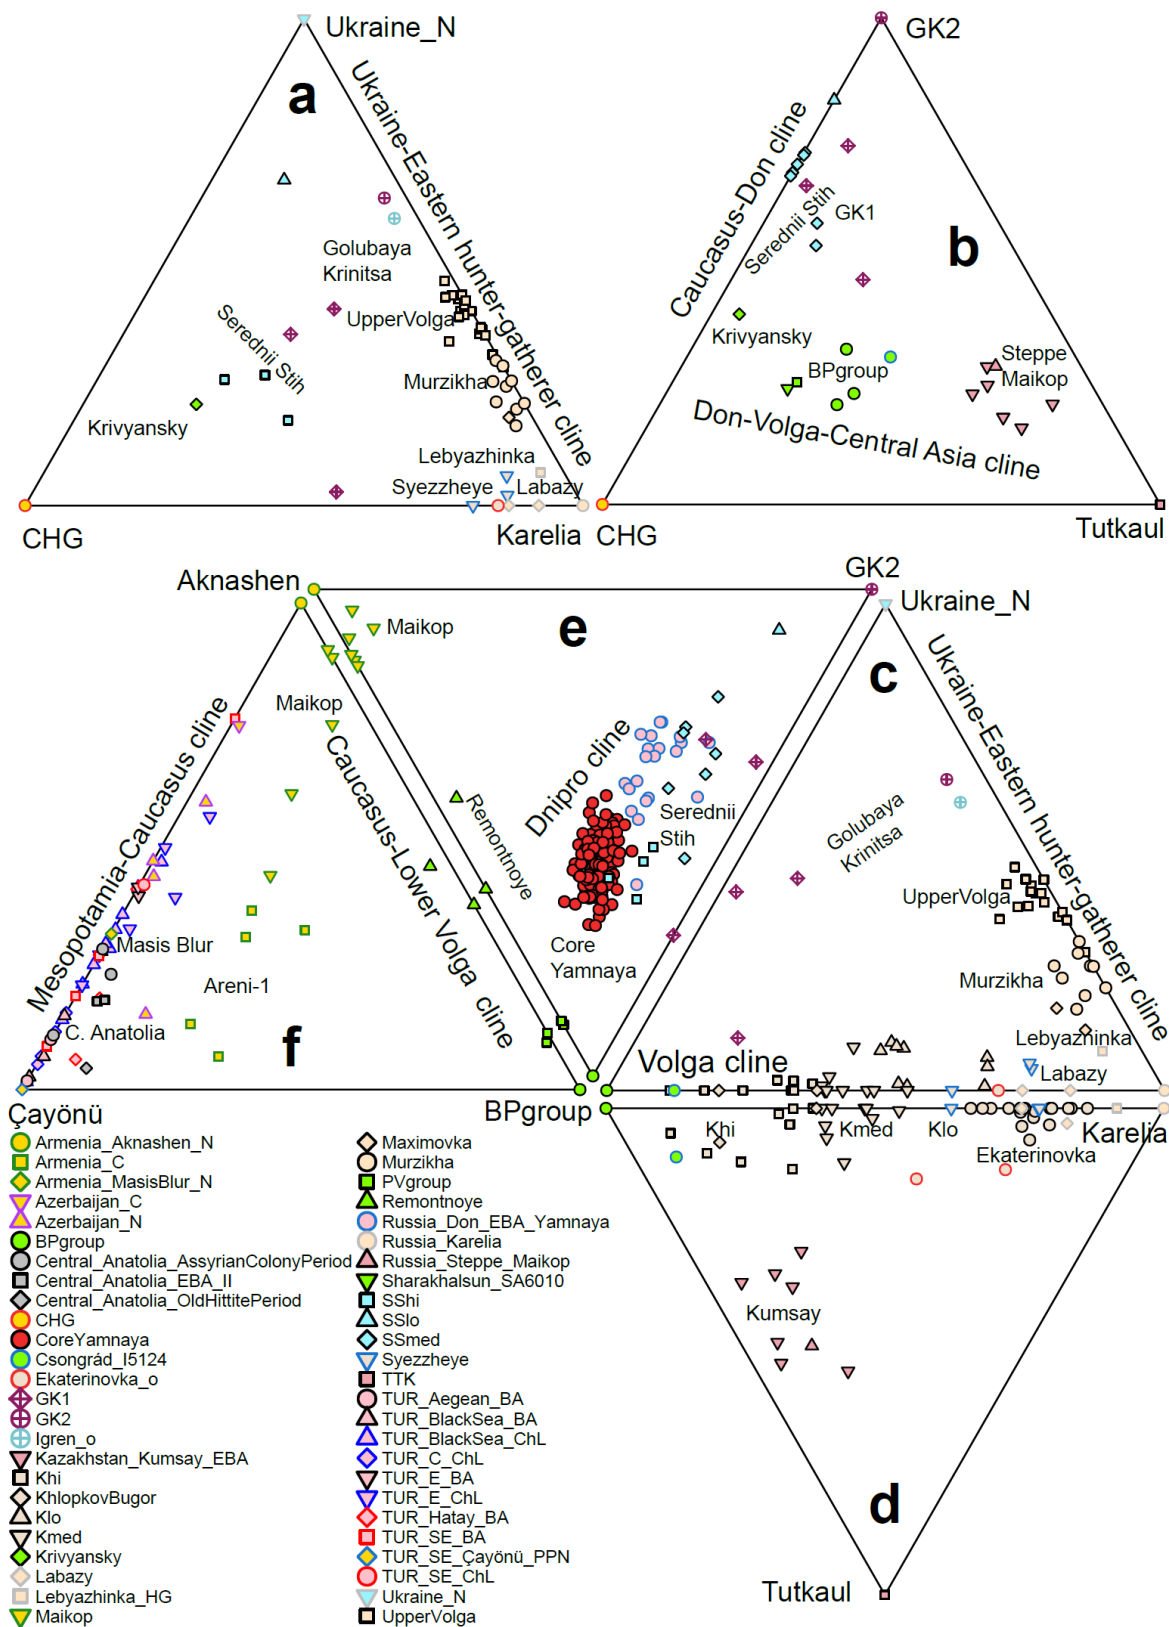

391  
392



393 *(3) Caucasus-Lower Volga Cline (CLV):* The Yamnaya are on the edge of the Dnipro cline,  
394 having less UNHG/GK2-related ancestry than other cline populations; thus, they cannot be  
395 modeled in terms of them alone (Fig. 1), but must have possessed more of a second source of  
396 ancestry. We found that the only consistently fitting ( $p=0.67$ ) two-way model for the Core  
397 Yamnaya involved  $73.7\pm 3.4\%$  of the SShi subset of the Serednii Stih population and  $26.3\pm 3.4\%$   
398 from a population represented by a sample of two individuals from Eneolithic burial sites at  
399 Sukhaya Termista I (I28682) and Ulan IV (I28683), dated 4152-3637 BCE near the village of  
400 Remontnoye, north of the Manych Depression on the watershed between the Lower Don and  
401 Caspian. The Remontnoye population is on neither the Volga nor Dnipro clines and is neither  
402 genetically close (Fig. 1) nor forms a clade ( $p<1e-10$ ) to any other single sampled population.  
403 We determined that it had at least two sources: a southern one from the Caucasus—either  
404 descendants of the Aknashen Neolithic in Armenia<sup>6</sup>, or ancestors of people of the Bronze Age  
405 Maikop<sup>5</sup> culture—and a northern one from a population from the low-EHG end of the Volga  
406 Cline such as the BPgroup. The Caucasus component is about half when using either Aknashen  
407 ( $44.6\pm 2.7\%$ ;  $p=0.66$ ) or Maikop ( $48.1\pm 2.9\%$ ;  $p=0.44$ ) as the proxy for the southern source. We  
408 also observed that the main cluster of Maikop individuals, including those buried in kurgans in  
409 Klady and Dlinnaya-Polyana, can be modeled as having  $86.2\pm 2.9\%$  ( $p=0.50$ ) Aknashen ancestry.  
410 Thus, there exists a Caucasus-Lower Volga (CLV) cline: Aknashen-Maikop-Remontnoye-  
411 Berezhnovka. These four populations are arrayed in order of decreasing Caucasus Neolithic  
412 component, concordant with their south-to-north geographical location. However, there were  
413 also populations of the CLV cline that bucked this latitudinal trend, such as the people of the  
414 North Caucasus at Progress-2 and Vonyuchka-1 that, unlike their Maikop neighbors, had little  
415 Caucasus Neolithic ancestry and were most like the people of Berezhnovka-1 in the Lower  
416 Volga. These violations of the genetic-geographic pattern prove long-range connectivity across  
417 the CLV area; they also caution us not to easily interpret genetic position along the CLV cline as  
418 predictive of position within the CLV geography.

419  
420 What was the proximal source for the southern ancestry of the intermediate populations of the  
421 CLV cline? Aknashen makes a poor choice, as it is both geographically remote from the steppe  
422 and earlier by two millennia (5985-5836 BCE) than Remontnoye. Neither is Maikop a good  
423 proximal source; it is geographically closer, but postdates (3932-2934 BCE) Remontnoye.  
424 Settlements at Meshoko and Svobodnoe, dated 4466-3810 BCE,<sup>42</sup> provide a temporally,  
425 geographically, and archaeologically plausible source, as they exhibit exchanges of exotic stone,  
426 copper, and stone mace heads with Volga Cline sites, setting the context for the expansion of  
427 Aknashen-like ancestry northward and Berezhnovka-like ancestry southward. These settlements  
428 are temporally earlier than Maikop and later than two individuals from Eneolithic  
429 Unakozovskaya (ref.<sup>5</sup> 4607-4450 BCE, and this study) in the North Caucasus; however, unlike  
430 Aknashen and Maikop, the Unakozovskaya population is not a good genetic source for  
431 Remontnoye, as the model BPgroup+Unakozovskaya fails ( $p<0.001$ ) by overestimating ( $Z=3.8$ )  
432 shared genetic drift with the CHG. The Unakozovskaya was not exactly the same genetically as  
433 the Maikop who succeeded them ( $p=2e-11$ ) but were genetically similar (Fig. 1) and can be  
434 modeled as  $95.3\pm 6.3\%$  Maikop and  $4.7\pm 6.3\%$  CHG ( $p=0.46$ ). Thus, there were three elements of  
435 ancestry in the North Caucasus in the Eneolithic: (i) Aknashen-related ancestry was dominant,  
436 representing the spread of the Neolithic from the south across the Caucasus mountains; (ii) there  
437 was some variation in CHG-related ancestry as suggested by the Maikop-Unakozovskaya  
438 contrast; and (iii) there was also a small component of northern Lower Volga ancestry of about

439 one seventh in the Maikop on average. Thus, in the north Caucasus there lived, side by side, both  
440 “high steppe” ancestry people genetically close to the Lower Volga Berezhnovka population  
441 (individuals at Progress-2 and Vonyuchka-1), as well as “low steppe” ancestry people in which  
442 the Lower Volga ancestry had been diluted by the greater contribution of the (Aknashen-related)  
443 Caucasus Neolithic.

444  
445 The Remontnoye and Berezhnovka people, like the Maikop people, were buried in kurgans.  
446 Thus, the kurgan burial rite was widespread 5000-3000 BCE among people of diverse ancestry  
447 from both the edges and middle of the CLV Cline, suggesting that—regardless of its ultimate  
448 origin and whether it was culturally adopted or spread by migration—it was common among the  
449 people of the CLV region.<sup>22</sup> In contrast, a distinctive position of the body on the back with knees  
450 raised and the floor of the burial pit covered with red ochre was shared by all the steppe groups  
451 including Serebnii Stih, groups on the Volga Cline, and Remontnoye, while the Maikop burial  
452 position was contracted on one side. Thus, some funeral customs united Maikop with the steppes  
453 and others separated them.

454  
455 The discovery of the CLV Cline suggests a solution to the question of the origin of the Dnipro  
456 Cline and thus the genetic origins of the Yamnaya. Most of their ancestors were people of the  
457 CLV Cline, similar to the sampled Remontnoye individuals. These CLV ancestors were drawn  
458 into the Dnipro-Don region and mixed with local groups to form Serebnii Stih people and  
459 eventually the Yamnaya. It must be emphasized that the CLV and Dnipro-Don sources need not  
460 have been identical to the sampled Remontnoye and SShi populations or have lived close to the  
461 sampling locations of these two populations. The Dnipro Cline can be fit (Fig. 2e) by a 3-way  
462 model in which the GK2 admixed with groups of mixed Aknashen and Berezhnovka ancestry.  
463 We note the aforementioned caveat that either of GK2 or UNHG could be contributing to the  
464 Dnipro Cline, but chose GK2 in Fig. 2e as this model has a higher p-value ( $p=0.93$ ) for the Core  
465 Yamnaya than the alternative with UNHG as the source ( $p=0.04$ ); however, we do not take this  
466 as evidence that the GK2 population was a better source than the UNHG as we have far better  
467 data for UNHG ( $n=35$  individuals) than GK2 ( $n=1$ ), which provides more power to detect slight  
468 but qualitatively unimportant oversimplifications in models. Note also, that GK2 is itself  $\sim 2/3$   
469 UNHG in ancestry, and that the proportion of either GK2 ( $22.5 \pm 1.8\%$ ) or UNHG ( $17.7 \pm 1.3\%$ ) is  
470 similar, and about one fifth. A full exploration of 3-way models (Supplementary Information  
471 section 2) reveals that the Yamnaya could have been formed from diverse (but similar) distal  
472 sources which include populations of (i) Neolithic or Chalcolithic age from Armenia<sup>6,9</sup> and  
473 Azerbaijan<sup>43,44</sup> representing the “Caucasus Neolithic”, (ii) GK2, UNHG, or Serebnii Stih  
474 representing the Dnipro-Don area, and (iii) BPgroup or PVgroup representing the Lower Volga-  
475 north Caucasus Eneolithic. What is invariant among the class of 2- and 3-way models for the  
476 Core Yamnaya is that they posit their descent from people of the CLV Cline (the remaining four  
477 fifths of their ancestry) who admixed with Dnipro-Don people of substantial UNHG ancestry.

478  
479 Our results show that movement of people and culture we document as having occurred along the  
480 CLV Cline was the vector by which Caucasus-derived ancestry like that present in the Aknashen  
481 Neolithic population flowed into the steppe and into the ancestors of the Yamnaya<sup>45</sup>. Crucially,  
482 the successful Remontnoye+SShi model predicts shared genetic drift with the Anatolian Neolithic  
483 outgroup well ( $Z=-0.8$ ). CLV cline populations can account for both Siberian-related (via the  
484 Lower Volga component) and Anatolian Neolithic-related (via the Caucasus Neolithic component)

485 affinities of the Yamnaya. Archaeological evidence shows that Balkan copper was traded during  
486 the late 5<sup>th</sup> millennium BCE across the steppes to North Caucasus farmer sites (Svobodnoe) and  
487 to the Volga (Khvalynsk), while Neolithic pots like those from Svobodnoe appeared in Dnipro-  
488 Don steppe sites connected with the Seredni Stih culture (Novodanilovka), documenting an active  
489 period of cultural exchange that was the context for the movement of groups of mixed  
490 BPgroup/Aknashen-related ancestry into the Dnipro-Don steppes.

491  
492 *CLV impact in the Caucasus and Anatolia:* CLV Cline people also had an impact further south,  
493 in Armenia and Anatolia (Fig. 2f). The earliest evidence of steppe ancestry south of the Caucasus  
494 is at Areni-1 in Chalcolithic Armenia around 4000 BCE<sup>9</sup>, documenting its southward penetration  
495 which parallels the incursion of Caucasus ancestry generating the Volga/Dnipro clines on the  
496 steppe. Our analysis (Supplementary Information section 2) clarifies that in Areni-1 the Lower  
497 Volga ancestry (26.9±2.3% BPgroup) admixed with a local “Masis Blur”-related Neolithic  
498 substratum, in contrast to the North Caucasus (at Maikop) where it combined with an  
499 “Aknashen”-related Neolithic substratum. The Aknashen/Masis Blur distinction of the Neolithic  
500 population of Armenia reflected the dilution of the native CHG ancestry that was higher in  
501 Aknashen than in Masis Blur.<sup>6</sup> We can model Masis Blur as 33.9±8.6% Aknashen and  
502 66.1±8.6% Çayönü ancestry (p=0.47) associated with the Pre-Pottery Neolithic of the Tigris  
503 Basin of Mesopotamia<sup>46</sup>, thus documenting the spread of early Neolithic ancestry into the  
504 Caucasus that formed a cline of diminishing Mesopotamian-related and increasing CHG-related  
505 ancestry: Çayönü-Masis Blur-Aknashen. Using CHG as the source, we see that the two  
506 populations from Armenia differed indeed in their retention of CHG ancestry, with more  
507 (42.0±3.8%) in Aknashen than in Masis Blur (13.7±4.0%). Some Anatolian Chalcolithic and  
508 Bronze Age groups can be derived entirely from this north-south Caucasus-Mesopotamian cline  
509 (Fig. 2f), while others also have ancestry from the east-west Mesopotamian-Anatolian cline,  
510 lacking any steppe ancestry.<sup>22,43,45,47,48</sup>

511  
512 The discovery of the Mesopotamian-Caucasus cline allows us to study the ancestry of the  
513 population of Bronze Age Central Anatolia<sup>22</sup> from the Early Bronze Age (2750-2500 BCE),  
514 Assyrian Colony (2000-1750 BCE), and Old Hittite (1750-1500 BCE) periods. We cannot be  
515 certain of what languages were spoken by these individuals in what may well have been  
516 multilingual societies, but we document for the first time that they had a small amount of CLV  
517 cline ancestry combined with Mesopotamian (Çayönü) ancestry (Supplementary Information,  
518 section 2; Fig. 2f; Extended Data Fig. 1). The inferred amount of ancestry from the CLV or  
519 CLV-influenced source depends on the amount of “dilution” of this ancestry in the source: more  
520 such ancestry is required from populations of higher dilution. For example, it is estimated as  
521 10.8±1.7% ancestry (p=0.14) from the BPgroup, or about double 19.0±2.4% from Remontnoye  
522 (p=0.19)—whose own ancestry is about half from the BPgroup—or 33.5±4.8% of Armenia\_C  
523 ancestry (p=0.10)—where the BPgroup ancestry is lower.

524  
525 The exact source of the steppe ancestry in Anatolia cannot be precisely determined, but it is  
526 noted that all fitting models involve some of it (Extended Data Fig. 1a). Some of the steppe-  
527 related sources can be rejected on chronological grounds; for example, the Core Yamnaya itself  
528 (12.2±2.0%; p=0.10) as well as western Yamnaya-derived populations from Southeastern Europe  
529 such as from Boyanovo or Mayaky Early Bronze Age<sup>36</sup> (Extended Data Fig. 1b). Moreover,  
530 when we consider pairs of steppe sources (and can thus place the steppe ancestry at varying

531 points along the Volga, Dnipro, and CLV clines), we observe a negative hunter-gatherer  
532 contribution ( $-3.4 \pm 2.6\%$  EHG) on the Volga cline, and also on the Dnipro cline ( $-2.3 \pm 2.7\%$   
533 UNHG or  $-3.9 \pm 3.5\%$  GK2); thus, there is no evidence that the admixing population had more  
534 EHG/UNHG/GK2 ancestry than the BPgroup/Core Yamnaya endpoints of these two clines  
535 (Supplementary Information section 2). The admixing population in this analysis contributed a  
536 significant amount of BPgroup ancestry ( $8.8 \pm 2.7\%$ ) from the CLV cline and was consistent with  
537 being on that cline ( $p=0.129$ ). Thus, a model in which the steppe ancestry is derived from the  
538 Caucasus-Lower Volga Eneolithic is not only geographically and chronologically plausible but  
539 also genetically so. The steppe+Mesopotamian class of models fit the Central Anatolian Bronze  
540 Age but do not fit any of the Chalcolithic/Bronze Age Anatolian regional subsets ( $p<0.001$ ; the  
541 BPgroup+Çayönü model is shown in Extended Data Fig. 1c), indicating that their success is not  
542 due to their general applicability. Moreover, the steppe ancestry in the Central Anatolian Bronze  
543 Age is observed in all individuals of the three periods (Extended Data Fig. 2d) and is thus not  
544 driven by any outlier individuals within the population. Its presence in both Early Bronze Age  
545 individuals from Ovaören south of the Kızılırmak river and in Middle Late Bronze Age  
546 individuals from Kalehöyük just within the bend of the river is consistent with the idea that the  
547 Kızılırmak formed an Anatolian-Hattic linguistic boundary that was crossed some time before  
548 the ca. 1730 BCE conquest of Hattusa by the Hittites.<sup>49</sup> Regardless of the linguistic identity of  
549 the sampled individuals, the truly unique blend of CLV and Mesopotamian ancestries found in  
550 the Central Anatolia Bronze Age calls for an explanation.

551  
552 How and when did this blend reach Central Anatolia? We note that populations along the path  
553 from the steppe to Central Anatolia can all be modeled with BPgroup ancestry and distinctive  
554 substratum ancestries along the north-south / Caucasus-Mesopotamia cline: Aknashen-related in  
555 the North Caucasus Maikop; Masis Blur-related in the South Caucasus Chalcolithic population  
556 of Armenia at Areni-1; and Mesopotamian Neolithic for the Central Anatolian Bronze Age  
557 (Extended Data Fig. 1e, f). This series of admixtures had certainly begun by ca. 4300-4000BCE  
558 (the date range of the Armenia\_C population<sup>9</sup>) and can be dated using DATES to  $4382 \pm 63$ BCE  
559 (Extended Data Fig. 2f). The Pre-Pottery Neolithic population of Çayönü was itself genetically  
560 halfway between that of Mardin<sup>10</sup>, 200km to the east, and the Central Anatolian pottery Neolithic  
561 at Çatalhöyük along the east-west / Mesopotamian-Anatolian cline. Chalcolithic/Bronze Age  
562 people from Southeastern and Central Anatolia all had ancestry from the same Çatalhöyük-  
563 Mardin continuum and such populations may have been proximal sources for the Çayönü-related  
564 ancestry of the Central Anatolian Bronze Age population (Supplementary Information section 2).  
565 If the Proto-Anatolian population was formed in this region by the admixture of CLV cline  
566 people with Mesopotamian ones then their descendants may have been present there at the  
567 unknown site of Armi whose Anatolian personal names are recorded by their neighbors in the  
568 kingdom of Ebla in Syria.<sup>50</sup> We thus propose the following hypothesis: that CLV cline people  
569 migrated southwards ca. 4400BCE, or about a millennium before the appearance of the  
570 Yamnaya, (admixing with different substratum populations along the way) and then westwards  
571 before finally reaching Central Anatolia.

572  
573 We in fact find Y-chromosome evidence that is consistent with the autosomal evidence. Sporadic  
574 instances of the steppe-associated Y-chromosome haplogroup R-V1636 in West Asia occurred at  
575 Arslantepe<sup>43</sup> in Eastern Anatolia and Kalavan<sup>9</sup> in Armenia in the Early Bronze Age (~3300-2500  
576 BCE) among individuals without detectible steppe ancestry<sup>45</sup> and these could be remnants of the

577 dilution process. This haplogroup was found in the male individual from Remontnoye, both  
 578 individuals from Progress-2<sup>5</sup> and two of three males from Berezhnovka, in addition to its  
 579 occurrence in eleven individuals of the Volga Cline and thus was a prominent lineage of the pre-  
 580 Yamnaya steppe. Isolated instances have also been found beyond the steppe in Corded Ware  
 581 individuals from Esperstedt in Germany<sup>17</sup> and Gjerrild in Denmark.<sup>51</sup> The expansive distribution  
 582 of R-V1636 on the steppe and beyond contrasts with its disappearance on the steppe after the  
 583 Yamnaya arrived on the scene: a single individual (SA6010; 2886-2671 BCE) from  
 584 Sharakhalsun<sup>5</sup> has it, with a genetic profile consistent with CLV ancestry (Fig. 2), the last  
 585 detected holdout of this once pervasive population (Fig. 3).  
 586

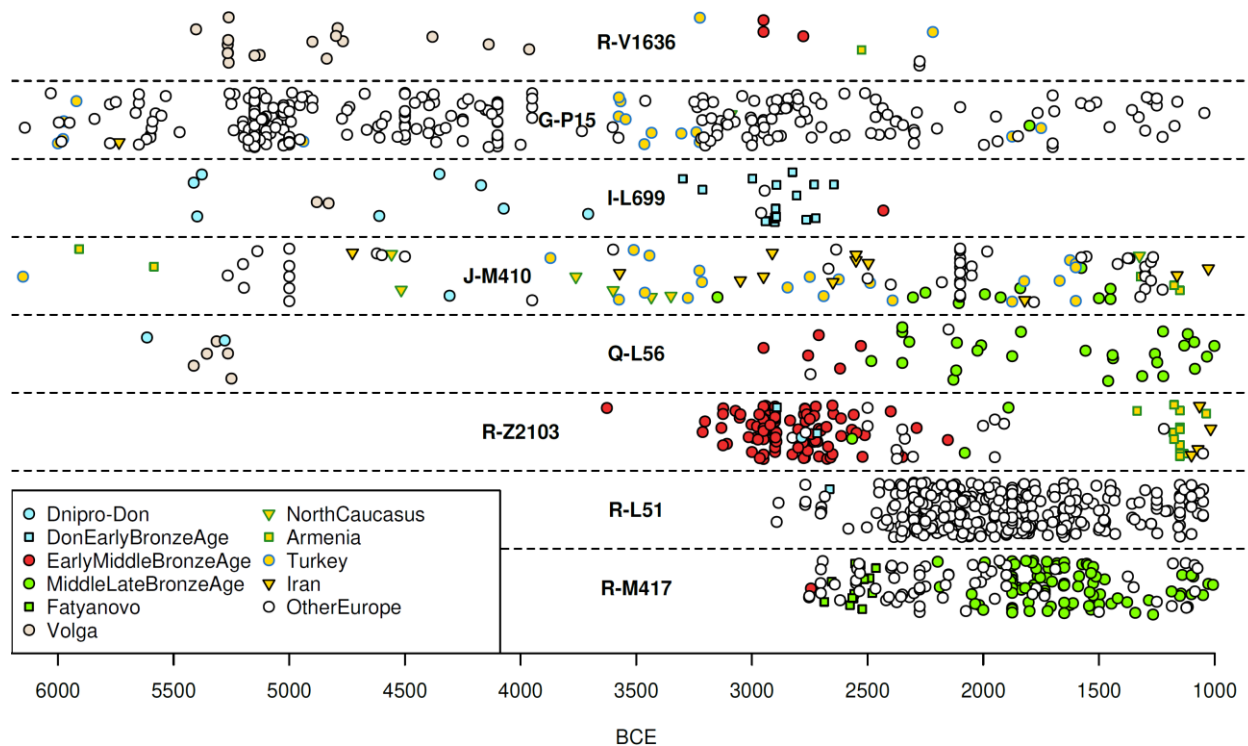

587  
 588 **Figure 3. Patrilineal succession.** Temporal distribution of key Y-chromosome haplogroups from  
 589 Kazakhstan, Kyrgyzstan, Mongolia, Russia, Turkmenistan, Ukraine, Uzbekistan, and  
 590 comparative regions of Europe and West Asia 6000-1000 BCE. The Early and Middle Bronze  
 591 Age group includes the Yamnaya, Afanasievo, Poltavka, Catacomb, Chemurchek, and North  
 592 Caucasus cultures; the Middle and Late Bronze Age group individuals of diverse cultures down  
 593 to 1000 BCE including those of the Sintashta, Andronovo, Potapovka, and Srubnaya cultures.  
 594

### 595 The Yamnaya expansion broke correlations between geography and genetics

596  
 597 We have traced the origins of the Yamnaya to the Dnipro Cline and the populations of the  
 598 Serechnii Stih culture: the Yamnaya were formed as people of the CLV cline admixed with  
 599 people of the Dnipro-Don area having UNHG ancestry. Deeper in time, the CLV cline was  
 600 formed by the admixture of Aknashen-related and BPgroup-related people who, in turn, were  
 601 formed by earlier mixtures still: the Caucasus Neolithic represented at Aknashen by the  
 602 admixture of CHG people with Neolithic farmers of the Fertile Crescent<sup>6,10</sup> and the lower Volga  
 603 Eneolithic people represented by BPgroup had ancestries that were related to CHG, EHG, and

604 people from Siberia or Central Asia. Dating this complex sequence of admixtures could be done  
605 by generating time transects of fine resolution in all relevant areas from which the ancestors of  
606 the Yamnaya were drawn across the millennia until they finally combined to form the Yamnaya  
607 genetic profile somewhere in the territory of the Serednii Stih culture: seeing the admixture “as it  
608 happened” through the lens of ancient DNA. Our study has revealed the outlines of this  
609 millennia-long process and future studies may fill in the details.

610  
611 A different way is to date the admixture itself in the genomes of the Yamnaya using methods like  
612 DATES<sup>52</sup> to measure the average sizes of stretches of ancestry related to UNHG/EHG hunter-  
613 gatherer populations on the one hand, and West Asian/Caucasus-related populations on the other,  
614 as this reflects the number of generations elapsed since mixture began and stretches of ancestry  
615 broke down. This population contrast aligns to the differentiation along PC2 (Fig. 1). We would  
616 also like to model the Core Yamnaya in terms of ancestry along the Dnipro cline itself (their last  
617 and most proximal admixture event), but unfortunately this is challenging given that the  
618 Yamnaya themselves are the end of the Dnipro cline (Fig. 1). The inferred date of 4038±48 BCE  
619 (Extended Data Fig. 2a) should thus be viewed with caution given the complex history of the  
620 ancestors of the Yamnaya, and admixture may have taken place both before and after this date.  
621 Nonetheless, an Eneolithic time frame (with a small standard error of <2 generations) proves that  
622 the admixture derived using qpAdm and observed visually in PCA did not occur in the remote  
623 past, but corresponds, at least in part, to the efflorescence of the Serednii Stih culture that our  
624 reconstruction points to as ancestral to the Yamnaya.

625  
626 Uncertainty about where, exactly, within the territory of the Serednii Stih culture the ancestors of  
627 the Core Yamnaya lived contrasts with their expansive distribution after the formation of the  
628 Yamnaya archaeological horizon: individuals we identified as “Core Yamnaya” (Extended Data  
629 Table 2) cluster in a small portion of the PCA (Fig. 1) and are from several countries: China,  
630 Hungary, Kazakhstan, Moldova, Romania, Ukraine (Extended Data Table 2), and 15 different  
631 locations in Russia (Fig. 4a). The homogeneity is also evident in a mean  $F_{ST}$  of 0.005,  
632 comparable to that between modern northern Europeans (Extended Data Table 3). This  
633 remarkable homogeneity across vast geographical distances of the “eastern” expansion of the  
634 Yamnaya shows that many of them mixed very little if at all with any of the people that inhabited  
635 the Eurasian steppe before them. The Don Yamnaya (Fig. 4a) are distinctive and can be modeled  
636 with 79.4±1.1% Core Yamnaya and 20.6±1.1% UNHG ancestry; the actual proportion of Core  
637 Yamnaya ancestry may be lower if, as is plausible, the Core Yamnaya admixed with a Serednii  
638 Stih population of partial UNHG ancestry (e.g., 40.0±4.7% with SSmed as the Serednii Stih  
639 source). The Don Yamnaya were formed in the late 4<sup>th</sup> millennium BCE (Extended Data Fig.  
640 2b), a time during which unmixed UNHG, after a millennium or more of the Serednii Stih  
641 culture, would be rare if they existed at all.

642  
643 The western expansion of the Core Yamnaya also brought them into southeastern Europe;  
644 Yamnaya there or other individuals of “high steppe ancestry” can be found as far west and south  
645 as Albania and Bulgaria.<sup>6</sup> Many western Yamnaya cluster with the Core Yamnaya, but many  
646 also deviate in the direction of Neolithic and Chalcolithic populations of southeastern and central  
647 Europe (Fig. 4b) and can be modeled with admixture from such populations (Extended Data  
648 Table 4). This admixture also took place in the late 4<sup>th</sup> millennium BCE (Extended Data Fig. 2c),  
649 after the sporadic early Chalcolithic migrations into southeastern Europe from the steppe.<sup>36</sup> It is

650 interesting that after the Don Yamnaya formed they participated little or not at all in the Core  
651 Yamnaya expansion to either the Altai or SE Europe, and thus the Lower Don represented a cul-  
652 de-sac for the Yamnaya expansion.

653  
654 The late 4<sup>th</sup> millennium BCE admixtures with European farmers and UNHG-admixed  
655 populations frame the Dnipro-Don region from west and east, providing another line of evidence  
656 for the formation of the Yamnaya within this region. Y chromosome haplogroup sharing—which  
657 traces the entirely male line and is of particular interest in societies that have patrilineal  
658 traditions—(Fig. 3) is less informative for tracing the origins of the Core Yamnaya, but proves  
659 continuity of the Don Yamnaya with their Serednii Stih ancestors. Haplogroup I-L699 was an  
660 important lineage in the Dnipro area since the Neolithic hunter-gatherer period, continued to be  
661 prevalent among the Serdenii Stih, and in the Don Yamnaya was dominant (17/20 instances).  
662 The Core Yamnaya belonged primarily to haplogroup R-M269 (49/51 instances) most of which  
663 could be determined as belonging to the Z2103 sub-lineage (41/51). This lineage is  
664 unprecedented in our sampling of the steppe before the Yamnaya period; its closest relative is the  
665 L51 lineage which dominated the Beaker group<sup>3</sup> and mainland Europe outside the steppe (Fig.  
666 3), with a slightly more distant relative in the R-PF7563 lineage found in Pylos in Mycenaean  
667 Greece.<sup>45</sup> With an estimated time of formation of ~4450 BCE ([https://www.yfull.com/tree/R-](https://www.yfull.com/tree/R-L23/)  
668 [L23/](https://www.yfull.com/tree/R-L23/); v11.04.00), the R-L23 lineage unifies Beaker, Yamnaya, and Mycenaean Y-chromosomes  
669 within an Eneolithic timeframe, which is consistent with the ancestors of these three groups  
670 being part of a single population in the Yamnaya period itself since population divergences are  
671 always lower than the genetic divergences of specific haplotypes. It is a challenge for future  
672 ancient DNA studies to find the population in which the Eneolithic R-L23 founder lived and to  
673 trace his R-Z2103 descendants. Their absence from the Eneolithic record, together with the  
674 evidence (discussed below) for isolation in the formative period of the Yamnaya suggest that he  
675 might have been part of a small group not yet sampled.

676  
677 That the Core Yamnaya are part of the Dnipro cline may suggest an origin in the Dnipro basin  
678 itself, but (a) the Dnipro cline is generated by admixture with Dnipro-Don people (UNHG/GK2-  
679 related), and (b) the Yamnaya on the Don are also part of this cline, so an alternative origin in the  
680 Don area cannot be excluded. An origin of the Core Yamnaya further east, in the Caucasus-  
681 Volga region is unlikely given that they are not part of the Volga or CLV Clines. Conversely,  
682 placing Yamnaya origins west of the Dnipro is implausible as the Core Yamnaya are the  
683 population of the Dnipro Cline that is maximally derived from the eastern CLV Cline and they  
684 also do not have the European farmer-derived ancestry of western populations such as the  
685 Usatove (Fig. 1b).<sup>15</sup> The Core Yamnaya share ancestry with people of the whole Dnipro-Don-  
686 Volga-Caucasus region, but their ancestral mix includes all components also found in the  
687 Serednii Stih, while these are lacking elsewhere (Extended Data Fig. 3). A more western origin  
688 of the Core Yamnaya would also bring their latest ancestors in proximity to the place of origin of  
689 the Corded Ware complex whose origin is itself in question but must have certainly been in the  
690 area of central-eastern Europe occupied by the Globular Amphora culture west of the Core  
691 Yamnaya. The Corded Ware population, which could trace a large part of its ancestry to the  
692 Yamnaya,<sup>2</sup> was formed by admixture concurrent with the Yamnaya expansion<sup>52</sup> (Extended Data  
693 Fig. 2d), shared segments of IBD proving connections within a shallow genealogical timeframe,  
694 and had a balance of ancestral components from the Caucasus and eastern Europe  
695 indistinguishable from the Yamnaya.<sup>6</sup> In combination, these lines of evidence suggests that it

696 was formed indeed by early 3<sup>rd</sup> millennium BCE admixture with Yamnaya, or, at the very least,  
 697 genetically Yamnaya ancestors that need not have been Yamnaya in the archaeological sense.  
 698 The geographical homelands of the Corded Ware and Yamnaya would then conceivably be in  
 699 geographical proximity to allow for their synchronous emergence and shared ancestry. The  
 700 Dniro-Don area of the Serednii Stih culture fits the genetic data, as it explains the ancestry of  
 701 the nascent Core Yamnaya and places them in precisely the area from which both Corded Ware,  
 702 and Southeastern European Yamnaya (in the west) and the Don Yamnaya (in the east) could  
 703 have emerged by admixture of the Core Yamnaya with European farmers and UNHG  
 704 respectively.

706 **Figure 4: Population structure in people with a Yamnaya cultural affiliation.** Individuals are  
 707 projected in the same space as in Fig. 1. (a) showing that the Core Yamnaya cluster (black  
 708 symbols) from diverse sites is differentiated from the Don Yamnaya (blue) who tend towards the  
 709 UNHG. (b) Yamnaya individuals in the West (Ukraine, Hungary, Slovakia, and Southeastern  
 710 Europe) include a tight cluster of individuals as well as others that tend towards the direction of  
 711 European Neolithic and Chalcolithic groups from Romania and Hungary. Individuals from  
 712 Russia are shown in grey circles in panel (b).  
 713

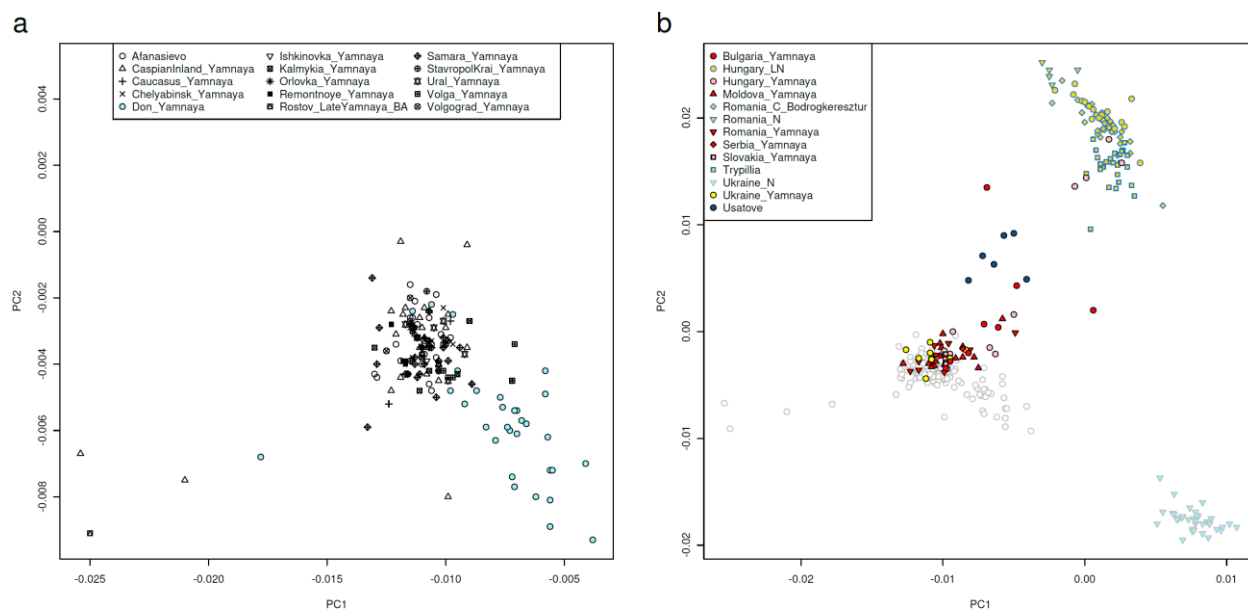

714  
 715

### 716 From Serednii Stih to Yamnaya: the 4<sup>th</sup> millennium BCE

717 We estimated the population growth trajectory of Core Yamnaya using HapNe-LD, a  
 718 methodology that can infer effective population size fluctuations in low-coverage ancient DNA  
 719 data.<sup>53</sup> Figure 5 shows the results separately analyzed for Core Yamnaya dating to the first three  
 720 hundred years of our sampling (n=25) who produce a 95% confidence interval of 3829-3374  
 721 BCE for the time before growth, and 3642-3145 BCE for Core Yamnaya groups from the later  
 722 three hundred years (n=26). In both cases, these correspond to growth from an effective number  
 723 of reproducing individuals of a few thousand people. These intervals overlap at 3642-3374 BCE,  
 724 corresponding to the late Serednii Stih period. Taken together with the admixture dating, these  
 725 findings point to a scenario where the Serednii Stih were largely formed by admixture before  
 726 4000 BCE likely somewhere within the geographic span of the Dniro-Don Cline. Half a  
 727 millennium later, a subgroup of them developed cultural innovations that allowed them to



728 expand dramatically, manifesting in a way that can be detected in the archaeological record  
729 around 3300 BCE in both the Pontic and Caspian Steppes.

730  
731 **Figure 5: Trajectory of the Yamnaya expansion.** We use HapNe-LD to estimate the changes in  
732 effective population size over time of Yamnaya ancestors, performing the computation separately  
733 for the individuals from the earlier three hundred years (a) of our sampling, and the later three  
734 hundred years (b); shading shows uncertainty intervals. We infer an extraordinary population  
735 expansion (c) after 3642-3374 BCE (intersection of 95% confidence intervals for the two  
736 analyses for the minimum), from a time when the effective size is a few thousand to an order of  
737 magnitude larger.

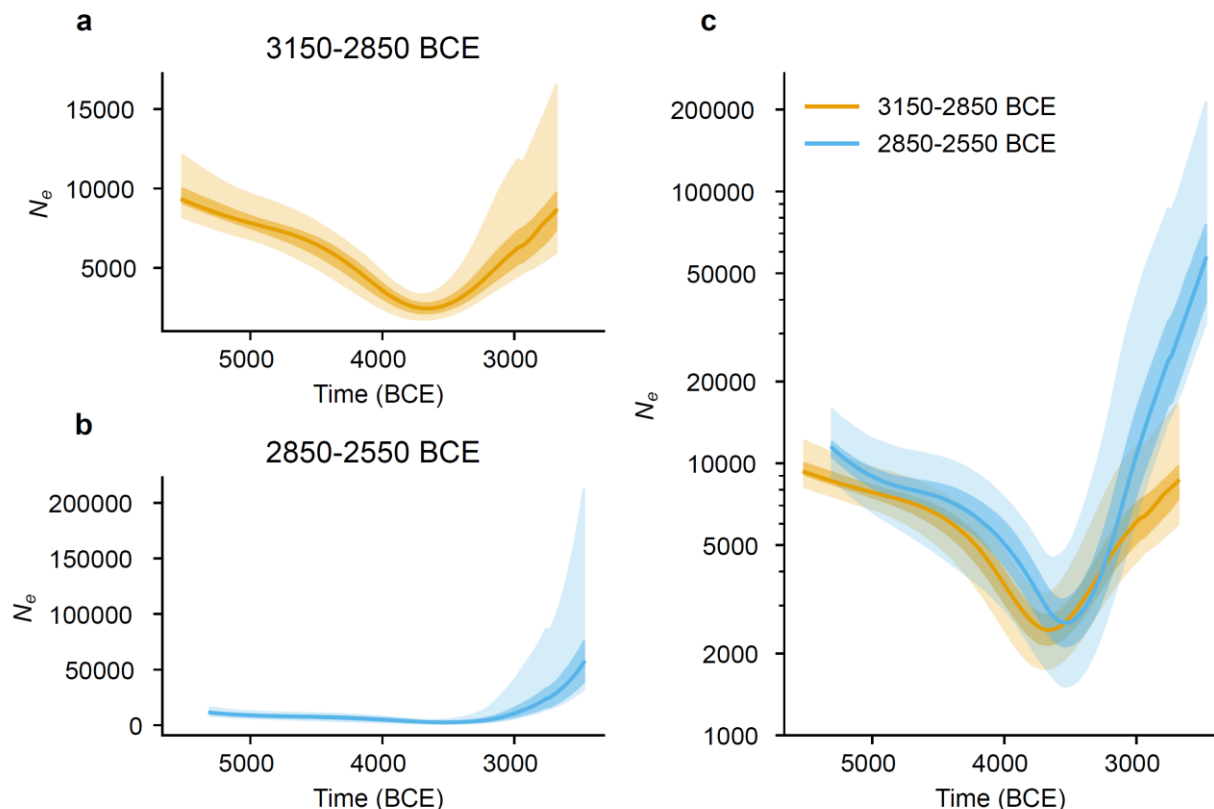

738  
740  
741 We tested for segments of the genome Identical-By-Descent (IBD) between pairs of  
742 individuals<sup>54</sup>, and found that the Yamnaya expansion transformed the interconnectedness of  
743 steppe populations. Before the Yamnaya, IBD links of  $\geq 20\text{cM}$  did exist between regional  
744 populations (Fig. 6a), but this network of connections expanded dramatically in the Yamnaya  
745 period (Fig. 6b). Prior to the Yamnaya period, the rate of IBD links for individuals separated by  
746 more than 500km was vanishingly low (Fig. 6c), but in Yamnaya times, it was measurably non-  
747 zero (at a few percent) for distance separations between 500-5000km (Fig. 6d). We also studied  
748 close genetic relatives, defined as sharing at least three  $\geq 20\text{cM}$  segments or a total sum of IBD  
749  $\geq 100\text{cM}$ . Both before and during the Yamnaya period, close relatives are only detected living  
750 within 500km, with a greatly elevated rate in the same cemetery (Fig. 6e, f). We examined  
751 Yamnaya-Afanasiovo individuals in kurgans or kurgan cemeteries represented by at least two  
752 individuals (Fig. 6g), and found that around 14.4% of individual pairs were close relatives within

753 kurgans and 7.4% of individual pairs were close relatives across kurgans of the same cemetery.  
754 These patterns are general across Yamnaya kurgan cemeteries (they are not dominated by one or  
755 a few sites with large numbers of samples). The observed rate of close relatives is much less than  
756 the 29.0% rate among pairs of individuals in Hazleton North chambered tomb in Neolithic  
757 Britain ~3700BCE<sup>55</sup> ( $p=0.00075$ ; Fisher's exact test), where 27 of 35 sequenced individuals were  
758 all found to be part of the same genetically tightly connected pedigree. These findings disprove  
759 theories that kurgans were "family tombs"<sup>56</sup> of biological relatives. Instead, kurgan cemeteries  
760 largely included individuals that were biological kin only in the sense of sharing common  
761 descent for a population that lived many centuries in the past; if there were kinship links within  
762 the same kurgan, they were largely non-biological ones.

763  
764 **Figure 6: IBD analysis of the Yamnaya and their predecessors.** Pairs of individuals linked by  
765 at least one IBD segment  $\geq 20\text{cM}$  in length reveal a sparse and highly connected network in the  
766 Pre-Yamnaya (a) and Yamnaya (b) groups. No detectible IBD is found in the Pre-Yamnaya  
767 period beyond the scale of 1000km (c); Yamnaya share more IBD with each other at short  
768 distance scales but IBD sharing extends all the way to the ~6000km scale of their geographical  
769 distribution. However, closely related individuals only occur at short distance scales in both Pre-  
770 Yamnaya (e) and Yamnaya (f) groups, indicating that the IBD sharing in the Yamnaya was a  
771 legacy of their common origin. (g) In a set of 9 Yamnaya cemeteries, and a total of 25 kurgans  
772 closely or distantly related individuals are virtually absent in inter-cemetery comparisons, more  
773 are found in inter-kurgan/within-cemetery comparisons, and more still in intra-kurgan  
774 comparisons; nonetheless, most Yamnaya individuals in all comparisons were unrelated. Kurgan  
775 burial of close kin was less common than in the case of a local patrilineal dynasty as at a  
776 Neolithic long cairn at Neolithic Hazleton North,<sup>55</sup> but more common than in Neolithic  
777 monuments of Neolithic Ireland.<sup>57</sup>

778  
779

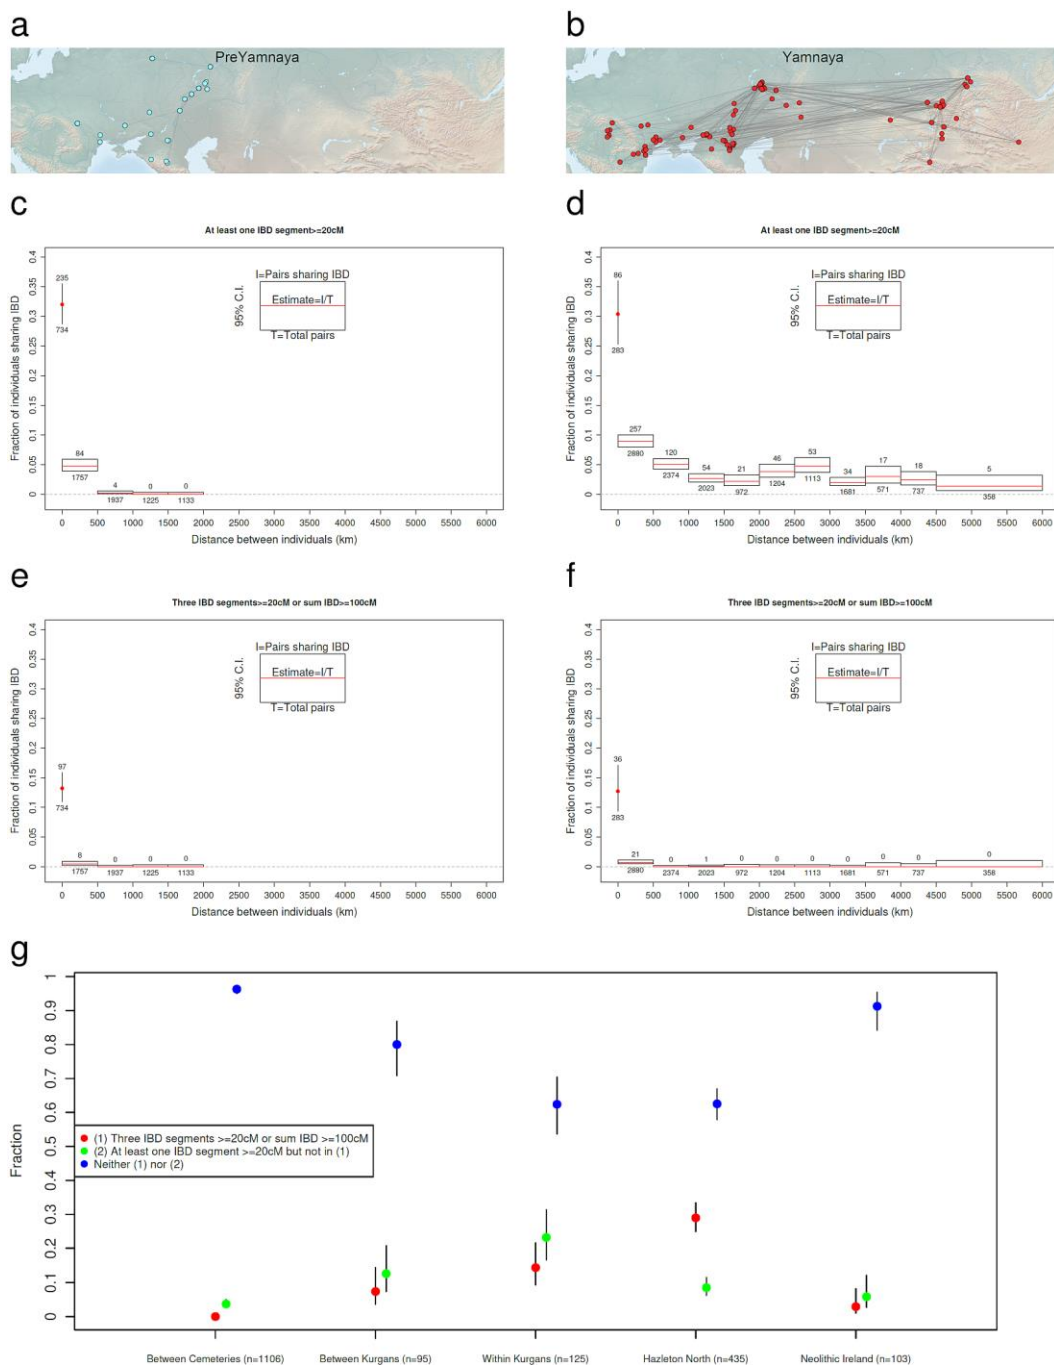

780  
781

## 782 The origin and spread of the first speakers of Indo-Anatolian languages

783 Different terminologies exist to designate the linguistic relationship of Anatolian and Indo-  
784 European languages. The traditional view includes both within an “Indo-European” (IE) group in  
785 which Anatolian languages usually represent the first split<sup>58,59</sup>. An alternative terminology,  
786 which we use here, names the entire linguistic group “Indo-Anatolian” (IA) and uses IE to refer  
787 to the set of related non-Anatolian languages such as Tocharian, Greek, Celtic, and Sanskrit.<sup>6,49</sup>  
788 Dates between 4300-3500 BCE have been proposed for the time of IA split<sup>49,59-61</sup> predating both  
789 the first attestation of the Hittite language in Central Anatolia (post-2000 BCE<sup>49</sup>) and the  
790 expansion of the Yamnaya archaeological culture (post-3300 BCE). We identify the Yamnaya

791 population as Proto-IE for several reasons. First, the Yamnaya were formed by admixture ~4000  
792 BCE and began their expansion during the middle of the 4<sup>th</sup> millennium BCE, corresponding to  
793 this linguistic split date between IE and Anatolian. Second, the Yamnaya were the source of the  
794 Afanasievo migration to the east<sup>62</sup> a leading candidate for the split of the ancestral form of  
795 Tocharian, widely recognized as the second split after that of Anatolian.<sup>63</sup> Third, the Yamnaya  
796 can be linked to the languages of Armenia<sup>45</sup> via both autosomal and Y-chromosome ancestry  
797 after ~2500 BCE, and to the languages of the Balkans<sup>13</sup> such as Greek.<sup>45,47</sup> Fourth, the Yamnaya  
798 can be linked indirectly to other IE speakers via the demographically and culturally  
799 transformative Corded Ware and Beaker archaeological cultures of the 3<sup>rd</sup> millennium BCE that  
800 postdate it by centuries. Most people of the Corded Ware culture of central-northern Europe had  
801 about three quarters of Yamnaya ancestry,<sup>2</sup> a close connection within a few generations that can  
802 be traced to the late 4<sup>th</sup> millennium BCE. The Beaker archaeological culture of central-western  
803 Europe also shared a substantial amount of autosomal ancestry with the Yamnaya and were also  
804 linked to them by their possession of R-M269 Y-chromosomes.<sup>3</sup> The impact of these derivative  
805 cultures in Europe leaves no doubt that they were linguistically Indo-European as most later  
806 Europeans were; the Corded Ware culture itself can also be tentatively linked via both autosomal  
807 ancestry and R-M417 Y-chromosomes with Indo-Iranian speakers via a long migratory route that  
808 included Fatyanovo<sup>20</sup> and Sintashta<sup>4,22</sup> intermediaries. A recent study proposed a much deeper  
809 origin of IA/IE languages<sup>64</sup> to ~6000 BCE or about two millennia older than our reconstruction  
810 and the consensus of other linguistic studies. The technical reasons for these older dates will  
811 doubtlessly be debated by linguists. From the point of view of archaeogenetics, we point out that  
812 the post-3000 BCE genetic transformation of Europe by Corded Ware and Beaker cultures on the  
813 heels of the Yamnaya expansion is hard to reconcile with linguistic split times of European  
814 languages consistently >4000 BCE as no major pan-European archaeological or migratory  
815 phenomena that are tied to the postulated South Caucasus IA homeland ~6000 BCE can be  
816 discerned.

817  
818 The Yamnaya culture stands as the unifying factor of all attested Indo-European languages. Yet,  
819 the homogeneity of the Yamnaya patrilineal community was formed out of the admixture of  
820 diverse ancestors, via proximal ancestors from the Dnipro and CLV clines (Fig. 2e). Yamnaya  
821 and Anatolians share ancestry from the CLV Cline (Fig. 2e,f), and thus, if the earliest IA  
822 language speakers shared any genetic ancestry at all—the possibility of an early transfer of  
823 language without admixture must not be discounted—then the CLV Cline is where this ancestry  
824 must have come from. On the Anatolian side, we see that ancestry from the southern Caucasus  
825 Neolithic end of the CLV Cline was impactful during the Chalcolithic and Bronze Ages<sup>45</sup> and  
826 Bronze Age Central Anatolians over the time span of Hittite presence there also had traces of  
827 Lower Volga-related ancestry which implies an origin north of the Caucasus (Fig. 2f; Extended  
828 Data Fig. 1). On the steppe side, we see that mixed Lower Volga/Caucasus Neolithic ancestry  
829 was present in the Dnipro Cline and maximized in the Yamnaya population along that cline (Fig.  
830 2e). IBD analysis identifies long ( $\geq 30\text{cM}$ ) segments shared by Eneolithic individuals from  
831 Berezhnovka-2 in the Lower Volga with Khvalynsk, Igren-8 Serednii Stih, and Areni-1  
832 Armenian Chalcolithic populations, providing strong direct evidence for the impact of Lower  
833 Volga ancestry on the Middle Volga, Dnipro, and South Caucasus regions, and active gene flow  
834 among these regions around the time the sampled individuals lived (Extended Data Table 5). The  
835 individual from Vonyucka-1 in the North Caucasus, in fact, has an IBD link (15.2cM) with an  
836 early Bronze Age Anatolian from Ovaören. Indo-Anatolian languages must have been spread

837 widely by people carrying CLV cline ancestry (Fig. 2) >4000BCE. However, only two  
838 descendant groups transmitted their languages to later groups: the Yamnaya in the Dnipro-Don  
839 area, aided by the mobility of their horse-wagon technology, and the Proto-Anatolians in the  
840 south, surviving in the diverse linguistic landscape of ancient Western Asia long enough for their  
841 languages to be recorded in writing after 2000BCE. Whatever their deeper origins in time out of  
842 the diverse constituents of CLV cline populations, the Indo-Anatolians must have been part of  
843 that cline. Genetics has little to say whether within this cline the IA languages were first spoken  
844 in the Caucasus end of the cline and spread into the steppe along with the spread of Caucasus  
845 ancestry, or vice versa, or even if a linguistic unity uncoupled with ancestry existed within the  
846 CLV continuum. DNA has traced back the ancestors of both Anatolian and IE speakers to the  
847 part of the CLV Cline that was north of the Caucasus mountains, bringing them into proximity  
848 with each other and uncovering their common CLV ancestry. However, it cannot adjudicate, on  
849 its own, who among the proximate and diverse distal ancestors of the CLV people were Pre-IA  
850 speaking. Future studies of the dynamics and temporality of intra-CLV contacts (to which  
851 genetics may add its information) and of the cultures of CLV people (as reconstructed by  
852 archaeology and linguistics) may decide who among them were most likely to have been the  
853 “original” Indo-Anatolians.

854  
855 Linguistic evidence has been advanced in favor of different solutions of the Proto-IE origins  
856 problem for more than two centuries and we review some recent proposals relevant to our  
857 reconstruction of early IA/IE history.

858  
859 First, the presence of some cereal terminology in IA languages and even more in IE was  
860 suggested to reflect a subsistence strategy that relied in part on agriculture; this was interpreted  
861 as providing evidence against a geographic origin of the populations that spread Indo-European  
862 languages east of the Dnipro valley, the easternmost point in which agriculture was used (along  
863 with foraging and herding) during the Eneolithic.<sup>65</sup> Our genetic findings are consistent with this  
864 constraint. If a Caucasus Neolithic population like that at Aknashen spread IA languages to the  
865 north (via the CLV cline to the Dnipro-Don area) it would almost certainly have had a cereal  
866 vocabulary, and then this vocabulary would have been retained during the Serednii Stih culture  
867 of the Eneolithic down to the time of the Yamnaya as agriculture continued to be used there.<sup>65</sup>

868  
869 Second, the fact that Anatolian languages are attested largely in western Anatolia has been  
870 interpreted as evidence for entry into Anatolia from the west (via the Balkans),<sup>49</sup> and thus we  
871 need compelling genetic evidence to provide a strong synthetic case for an eastern route. In fact,  
872 however, our genetic data does provide such a strong case, greatly increasing the plausibility of  
873 scenarios of an eastern entry of Proto-Anatolian speaking ancestors into Anatolia.<sup>66</sup> This is  
874 because we find that Central Anatolian Early Bronze Age people who were plausibly speakers of  
875 Anatolian languages based on their archaeological contexts, were striking genetic outliers from  
876 their neighbors due to having a minority component of their ancestry from the CLV (plausibly  
877 from the people who brought the ancestral form of Anatolian languages to Anatolia), the  
878 majority of their ancestry from Mesopotamian Neolithic farmers, and little or no ancestry from  
879 the Neolithic and Chalcolithic Anatolians who were overwhelming the source populations of  
880 other Early Bronze Age Anatolians. Mesopotamian Neolithic ancestry almost certainly had an  
881 eastern geographic distribution, while the Central Anatolian Bronze Age people had no evidence  
882 of the European farmer or European hunter-gatherer ancestry that CLV have encountered if they

883 had migrated to Anatolia from the west, so the genetic data favor an eastern route. How then  
884 could it be that there is no linguistic evidence of Anatolian speakers in eastern Anatolia? We  
885 propose that the archaeologically momentous expansion of the Kura-Araxes archaeological  
886 culture in the Caucasus and eastern Anatolia after around 3000BCE may have driven a wedge  
887 between steppe and West Asian speakers of IA languages, isolating them from each other and  
888 perhaps explaining their survival in western Anatolia into recorded history. That the expansion of  
889 the Kura-Araxes archaeological culture could have had a profound enough demographic impact  
890 to have pushed out Anatolian-speakers, is attested by genetic evidence showing that in Armenia,  
891 the spread of the Kura-Araxes culture was accompanied by the complete disappearance of CLV  
892 ancestry that had appeared there in the Chalcolithic (Fig. 2f).<sup>9,45,67</sup>

893  
894 The Kura-Araxes culture may not be the only reason for the IA split. The ancestors of the  
895 Yamnaya did not only become separated from their Anatolian linguistic relatives but from other  
896 steppe populations as well. The homogenization of the Yamnaya ancestral population during the  
897 4<sup>th</sup> millennium BCE, both in terms of its autosomal ancestry, and in terms of its Y-chromosome  
898 lineage, attest to a period of relative isolation and the cessation of admixture. Such isolation  
899 would foster linguistic divergence of the languages spoken in the pre-Yamnaya community with  
900 those of their linguistic relatives on the steppe. This isolation must have persisted even after the  
901 sudden appearance of the Yamnaya archaeological horizon. Mobility and geographical dispersal  
902 provided ample opportunities for the resumption of admixture, yet the genetic homogeneity of  
903 the “Core Yamnaya” across much of the steppe leaves little room for the absorption of any pre-  
904 existing steppe communities: they all seem to disappear in the face of the Yamnaya juggernaut.  
905 Did mixing occur between the segment of the Yamnaya population not buried in kurgans and  
906 locals they encountered while the kurgan-buried elite largely avoided it with some exceptions?<sup>15</sup>  
907 The rise of the Yamnaya in the Steppe at the expense of their predecessors was followed by their  
908 demise after a thousand years (Fig. 3), displaced by descendants of people of the Corded Ware  
909 culture. Was this the demise of the kurgan elites of the Yamnaya or of the population as a whole?  
910 The steppe was dominated by many and diverse groups later still, such as the Scythians and  
911 Sarmatian nomads of the Iron Age. These groups are certainly very diverse genetically, but their  
912 kurgans scattered across the steppe attest to the persistence of at least some elements of culture  
913 that began in the Caucasus-Volga area seven thousand years ago before blooming, in the Dnipro-  
914 Don area, into the Yamnaya culture that first united the steppe and impacted most of Eurasia. To  
915 what symbolic purpose did the Yamnaya and their precursors erect these mounds we may not  
916 ever fully know. If they aimed to preserve the memory of those buried under them, they did  
917 achieve their goal, as the kurgans, dotting the landscape of the Eurasian steppe, drew generations  
918 of archaeologists and anthropologists to their study, and enabled the genetic reconstruction of  
919 their makers’ origins presented here.

## 920 **Methods**

921

922 **Terminology for archaeological cultures and geographic locations:** For archaeological  
923 cultures and geographic locations that span more than one modern country, we used the  
924 prevalent term in the archaeological and genetic literature, for example using “Yamnaya” which  
925 is the common term used in Russia and most of Eastern Europe instead of the Ukrainian  
926 “Yamna”. For archaeological cultures and locations that are confined to a single country, we  
927 generally use the local terminology, for example we refer to the archaeological cultures of  
928 “Usatove” and “Trypillia” and “Serednii Stih” and the river “Dnipro” with the Ukrainian terms  
929 rather than the corresponding Russian terms “Usatovo”, “Tripolye,” “Sredni Stog” and “Dniepr”.

930

931 **Sampling ancient individuals:** The skeletal remains analyzed here were almost all sampled in  
932 ancient DNA clean rooms either at Harvard Medical School, the University of Vienna or the  
933 Institute for Archaeogenomics in Budapest. If available and accessible, we prioritized sampling  
934 petrous bones, taking bone powder from the cochlea by sandblasting and milling<sup>68</sup>, or directly  
935 drilling into the cochlea after physical surface cleaning, or drilling through the cranial base to  
936 minimize damage to intact skulls<sup>69</sup>. If we could not sample from the cochlea, we sought to  
937 sample a tooth, prioritizing the cementum layer after physical surface cleaning<sup>70</sup>. If neither a  
938 cochlea nor a tooth was available, we sought to sample a dense cortical bone, which we analyzed  
939 by drilling and collecting powder after physical surface cleaning. For some samples that could  
940 not leave the museum, we sampled on site, either drilling directly into the cochlea, the tooth root,  
941 or bone after physical surface removal. We sometimes dislodged auditory ossicles during  
942 sandblasting or drilling into the cochlea. When this happened during the cleaning procedure, we  
943 generally stopped the destructive sampling and collected the ossicle(s)<sup>71</sup>. As suggested in the  
944 study that recognized the high preservation of DNA in ossicles, we cleaned the ossicle with 10%  
945 Bleach and radiated it ultraviolet light for 10 minutes before submerging it in extraction buffer  
946 without attempting to produce powder.

947

948 **Ancient DNA data generation:** The samples we studied were processed in our laboratories  
949 between 2013 and 2023 and therefore were analyzed with changing protocols. Details and  
950 protocols used for each library can be found in Online Table 2. At Harvard Medical School,  
951 where the majority of wet laboratory work was done, we initially carried out all DNA extractions  
952 and Illumina library preparations manually, using small batches of samples and silica columns  
953 for DNA cleanup<sup>72-74</sup>. Since 2018, we used automated liquid handlers (Agilent Bravo  
954 Workstations) for both DNA extraction<sup>75</sup> and library preparation with magnetic beads (see  
955 supplementary material in <sup>76</sup> for automated double-stranded library preparation, and ref. <sup>77</sup> for  
956 automated single-stranded library preparation). We treated DNA extracts with USER (NEB)  
957 during library preparation to cut DNA at uracils; this treatment is inefficient at terminal uracils  
958 and leaves a damage pattern expected for ancient DNA at the terminal bases that can be filtered  
959 out for downstream analysis while allowing a library to be authenticated as old. All libraries  
960 were either dual barcoded through double-stranded ligation or dual indexed through indexing  
961 PCR at the end of single-stranded library preparation to allow pooling before sequencing.

962

963 Before 2015, we screened libraries for mitochondrial DNA before attempting to capture nuclear  
964 loci<sup>78</sup>. In the next couple of years, we added an increasing number of nuclear SNPs (between 10  
965 and 4000) as targets into the screening capture since mitochondrial DNA quality does not always

966 correlate well with nuclear DNA quality and quantity. We later increased the number of targeted  
967 SNPs in our nuclear capture from about 390,000 (390k)<sup>2,79</sup> to about 1.24 million (1240k)<sup>80</sup> for  
968 libraries passing the mitochondrial capture with nuclear spike-in. Later, we dropped the  
969 screening capture altogether and added the mitochondrial probes to the 1240k probes (1240k+).  
970 In 2022, we switched from the 1240k homebrew capture to a kitted capture product available  
971 from Twist Biosciences<sup>81</sup>.

972  
973 For ancient DNA data generated in the Budapest at the Institute of Archaeogenomics, HUN-REN  
974 Research Centre for the Humanities, we followed the protocol described in<sup>82</sup>.

975  
976 **Bioinformatic processing:** All ancient DNA libraries were sequenced with paired-end reads.  
977 We then performed the following steps: preprocessing, alignment and post-alignment filtering  
978 for variant calling. The goal of preprocessing is to take raw sequenced products and create  
979 merged sequences for alignment. We demultiplex reads, binning these to whichever library each  
980 read belongs to using the identifying barcodes and indices, trim these identifying markers as well  
981 as any residual adapter sequences, and merge each paired-end read into a single molecule using  
982 the overlap of the paired-end reads as a guide, employing a modified version of *SeqPrep*  
983 (<https://github.com/jstjohn/SeqPrep>). The resulting single-ended reads are aligned to both the  
984 *hg19* human genome reference (<https://www.internationalgenome.org/category/grch37/>) and the  
985 inferred ancestral Reconstructed Sapiens Reference Sequence (RSRS) mitochondrial sequence<sup>83</sup>  
986 using the *samse* aligner of *bwa*<sup>84</sup>. Duplicate molecules are marked by barcode bin, based on the  
987 same start/stop positions and orientation. The computational pipelines with specific parameters  
988 used are publicly available on GitHub at <https://github.com/dReichLab/ADNA-Tools> and  
989 <https://github.com/dReichLab/adna-workflow>.

990  
991 We used a ‘pseudohaploid genotyping’ approach to determine a randomly selected allele at SNP  
992 sets of interest. To represent the allele at each SNP, we randomly selected sequences from a pool  
993 of all sequences covering that position with a minimum data quality; our criteria were a  
994 minimum mapping quality of at least 10, and a base quality of at least 20, after trimming  
995 sequences by 2 base pairs at both 5’ and 3’ ends to remove damage artifacts. We assessed  
996 ancient DNA authenticity by using *contamMix-1.0.1051*<sup>85</sup> to search for heterogeneity in  
997 mitochondrial DNA sequences which are expected to be non-variable in uncontaminated  
998 individuals, and also ANGSD to test for heterogeneity in X chromosome sequences which are  
999 expected to be homozygous in male individuals.<sup>86</sup> We also evaluated authenticity of the ancient  
1000 samples by using *pmdtools*<sup>87</sup> to measure the rate of cytosine-to-thymine mutations in the first and  
1001 last nucleotides (in untrimmed sequences) which is expected for genuine ancient DNA<sup>73</sup>, and by  
1002 computing the ratio of Y chromosome to the sum of X and Y chromosome sequences which is  
1003 expected to be very low for females and to have a very much higher value for males. We  
1004 determined a consensus for mitochondrial DNA using *bcftools*  
1005 (<https://github.com/samtools/bcftools>) and *SAMTools*<sup>88</sup> requiring a minimum of 2-fold coverage  
1006 to call the nucleotide and a majority rule to determine its value. We used *HaploGrep2* to  
1007 determine mitochondrial haplogroups based on the phylotree database (mtDNA tree build  
1008 17).<sup>89,90</sup>

1009  
1010 **Principal Components Analysis:** Individuals in Fig. 1b are projected analysis in *smartpca*<sup>37</sup> using  
1011 parameters newshrink: YES and lsqproject: YES:



1012 on a PCA space whose axes are formed by the following set of populations: OberkasselCluster  
1013 (set of trans-Alpine WHG individuals identified in<sup>19</sup>), Russia\_Firsovo\_N, Iran\_HajjiFiruz\_C<sup>4</sup>,  
1014 Iran\_C\_SehGabi<sup>9</sup>, Iran\_C\_TepeHissar<sup>91</sup>, Israel\_C<sup>92</sup>, Germany\_EN\_LBK<sup>2,17,82,93</sup>

1015  
1016 **F<sub>ST</sub> estimation:** F<sub>ST</sub> was computed in *smartpca*<sup>37</sup> with parameters inbreed: YES and fstonly:  
1017 YES.<sup>94</sup>

1018  
1019 **Visualizing the three Eneolithic Clines:** Three models are fitted for Eneolithic cline  
1020 populations using qpAdm<sup>2</sup> and with OldAfrica, Russia\_AfontovaGora3, CHG,  
1021 Iran\_GanjDareh\_N, Italy\_Villabruna, Russia\_Sidelkino.SG, Turkey\_N set of Right populations  
1022 (Fig. 1c).

1023  
1024 **Model competition with qpAdm/qpWave:** We use qpWave/qpAdm methods<sup>2,30</sup> on diverse  
1025 target and source populations from the steppe and adjacent areas (Supplementary Information  
1026 section 2). We use OldAfrica, Russia\_AfontovaGora3, CHG, Iran\_GanjDareh\_N,  
1027 Italy\_Villabruna, Russia\_Sidelkino.SG, Turkey\_N as the set of Right populations for most  
1028 analyses. For the analysis of Anatolian populations, we expanded this set to OldAfrica, CHG,  
1029 Iran\_GanjDareh\_N, Italy\_Villabruna, Russia\_AfontovaGora3, Russia\_Sidelkino.SG,  
1030 TUR\_Marmara\_Barçın\_N, TUR\_C\_Boncuklu\_PPN, TUR\_C\_Çatalhöyük\_N, Natufian to gain  
1031 leverage for differentiating between different West Asian sources. For faster computation, we ran  
1032 qpWave/qpAdm on precomputed output from qpstats runs  
1033 (<https://github.com/DReichLab/AdmixTools/blob/master/qpfs.pdf>) with poplistname that  
1034 includes Han.DG, and all target, source, and Right populations, and parameters allsnps: YES,  
1035 inbreed: NO. Separate qpWave/qpAdm runs directly on genotype files were performed as needed  
1036 when the target or source populations were not present in the qpstats output with parameter  
1037 basepop: Han.DG. Feasible models are identified as having  $p > 0.05$ , all standard errors  $\leq 0.1$ , and  
1038 admixture proportions within  $\leq 2$  standard errors from 0 and 1. Target or source populations are  
1039 removed from the Right set. Competition of models A and B involves two qpWave/qpAdm runs  
1040 in which all sources of  $A \setminus B$  and  $B \setminus A$  ( $\setminus$  denotes set difference) are placed on the Right set.  
1041 Details of all analyses can be found in Supplementary Information section 2.

1042  
1043 **Y-chromosome haplogroup inference:** We used the methodology described in ref. <sup>6</sup> which used  
1044 the YFull YTree v. 8.09 phylogeny  
1045 ([https://github.com/YFullTeam/YTree/blob/master/ytree/tree\\_8.09.0.json](https://github.com/YFullTeam/YTree/blob/master/ytree/tree_8.09.0.json)) to denote Y-  
1046 chromosome haplogroups in terminal notation.<sup>95</sup>

1047  
1048 **Estimates of dates of admixture:** We used DATES<sup>4,52</sup> to estimate a date of admixture for the  
1049 Core Yamnaya, Don Yamnaya, Eastern European Yamnaya, Corded Ware, and Caucasus-  
1050 Anatolian populations (Extended Data Fig. 2). For the Core Yamnaya and Caucasus-Anatolian  
1051 populations, we used sets of diverse West Asian and European hunter-gatherer populations as the  
1052 two sources. For the Don Yamnaya we used the Core Yamnaya and UNHG as the two sources.  
1053 For the Eastern European Yamnaya we used the Core Yamnaya and a diverse set of  
1054 Neolithic/Chalcolithic “European farmers” from Fig. 4b. For the Corded Ware we used the Core  
1055 Yamnaya and Globular Amphora as the two sources. It is more important to use many source  
1056 samples even if they are not identical to the true ones; picking the wrong sources does not bias  
1057 the date estimate<sup>52</sup>.

1058

1059 **Identity-by-Descent (IBD) segment detection:** We used `ancIBD`<sup>54</sup> to detect IBD segments of  
1060 length  $\geq 8cM$ .

1061

1062 **Geographical distance estimation:** To study the decay of IBD with geographical distance, we  
1063 estimate distance between sites based on their latitude and longitude (Online Table 2) using the  
1064 Haversine distance as implemented in `distHaversine`<sup>96</sup> of the package *geosphere* in R.

1065

1066 **Estimates of effective population sizes:** We ran HapNe-LD (version 1.20230726<sup>18</sup>) using  
1067 default parameters and providing pseudo-haploid genotypes as input. Briefly, HapNe-LD uses a  
1068 summary statistic measuring long-range correlations between markers to infer fluctuations in the  
1069 effective population size (defined as the inverse of the coalescence rate) through time. We  
1070 studied two distinct sets of unrelated individuals all of which had a coverage of at least 0.7x on  
1071 the target autosomal SNPs and with a standard deviation on their estimated date smaller than 180  
1072 years (~6 generations). The first group consists of 25 Core Yamnaya individuals with estimated  
1073 dates ranging between 4500 and 4800 BP. The second group contains 26 Core Yamnaya  
1074 individuals ranging from 4800 to 5100 BP.

1075

1076 If no evidence of effective population size fluctuations can be detected in the data, HapNe-LD  
1077 produces a flat line. An output containing fluctuations should thus be interpreted as the detection  
1078 of changes in historical effective population sizes. Recent admixture between highly  
1079 differentiated populations ( $F_{st} > 0.1$ ) might lead to biases in LD-based analyses that induce  
1080 fluctuations similar to a population bottleneck. However, HapNe implements a test to flag the  
1081 presence of recent structure in the data, which was not detected in both sample sets (approximate  
1082  $p \geq 0.1$ ), suggesting that the observed signal instead reflects variation in the effective population  
1083 size of these groups.

1084

1085 In our analyses, the effective population size is defined as the inverse of the instantaneous  
1086 coalescence rate. This quantity corresponds to twice the number of breeding individuals in an  
1087 idealized population. We note that, in addition to changes in the number of individuals in the  
1088 population (census size), several factors, such as changes in population structure, selection, and  
1089 cultural practices,<sup>97</sup> can have an influence on the effective population size. These additional  
1090 factors may in part be responsible for the effective size fluctuations observed in the Core  
1091 Yamnaya.

1092

1093 Approximate confidence intervals were obtained using bootstrap with different chromosome  
1094 arms as resampling units. The beginning of the expansion was determined by using the location  
1095 of the minimum of each bootstrapped trajectory. We converted the results into years by  
1096 assuming 28.6 years per generation for the median minimum location and 25.6 and 31.5 years  
1097 per generation for the lower and upper bounds, respectively.<sup>98</sup> We used these values,  
1098 corresponding to the estimated number of years per generation for males (31.5) and females  
1099 (25.6) to account for uncertainty in the conversion factor.

1100

## 1101 **Data Access**

1102 Genotype data for individuals included in this study can be obtained from the Harvard Dataverse  
1103 repository through the following link (XXX). The DNA sequences reported in this paper are

1104 deposited in the European Nucleotide Archive under the accession number XXX. Other newly  
1105 reported data such as radiocarbon dates and archaeological context information are included in  
1106 the manuscript and supplementary files.

1107

### 1108 **Acknowledgments**

1109 We thank Alexey G. Nikitin for valuable advice and critical feedback. We thank Nicole  
1110 Adamski, Rebecca Bernardos, Nasreen Broomandkhoshbacht, Daniel Fernandes, Matthew Ferry,  
1111 Eadaoin Harney, Kirsten Mandl, Susanne Nordenfelt, Kristin Stewardson, Balázs G. Mende, and  
1112 Zhao Zhang for laboratory or bioinformatics work, and L'ubov Bembeeveva, Bianca Preda-  
1113 Bălănică, István Ecsedy, Andrey I. Gotlib, Volker M. Heyd, Skorobogatov Andrey  
1114 Mikhailovich, Nina Morgunova, Andrei Soficaru, Svetlana S. Tur, and Piotr Włodarczak for  
1115 anthropological work and critical comments. TH's research was supported by a grant from the  
1116 Hungarian Research, Development and Innovation Office (FK128013), the Bolyai Scholarship of  
1117 the Hungarian Academy of Sciences, and by the ÚNKP-23-5 New National Excellence Program  
1118 of the Ministry for Culture and Innovation from the source of the National Research,  
1119 Development and Innovation Fund. Pavel Flegontov and Leonid Vyazov were supported by the  
1120 Czech Ministry of Education, Youth and Sports (program ERC CZ, project no. LL2103). Pavel  
1121 Flegontov was supported by the Czech Science Foundation (project no. 21-27624S); the  
1122 European Union Operational Programme "Just Transition" (LERCO project no.  
1123 CZ.10.03.01/00/22\_003/0000003). We acknowledge support from the Polish scientific project  
1124 grant NCN OPUS 2015/17/B/HS3/01327, as well as Russian Science Foundatino grant #22-18-  
1125 00470 to Alexey A. Tishkin. We acknowledge support from the Museum of the Institute of Plant  
1126 and Animal Ecology (UB RAS, Ekaterinburg) to Pavel Kosintsev. The ancient DNA data  
1127 generation and analysis was supported by the National Institutes of Health (R01-HG012287), the  
1128 John Templeton Foundation (grant 61220), by a private gift from Jean-Francois Clin, by the  
1129 Allen Discovery Center program, a Paul G. Allen Frontiers Group advised program of the Paul  
1130 G. Allen Family Foundation and by the Howard Hughes Medical Institute (DR). The author-  
1131 accepted version of this article, that is, the version not reflecting proofreading and editing and  
1132 formatting changes following the article's acceptance, is subject to the Howard Hughes Medical  
1133 Institute (HHMI) Open Access to Publications policy, as HHMI lab heads have previously  
1134 granted a nonexclusive CC BY 4.0 license to the public and a sublicensable license to HHMI in  
1135 their research articles. Pursuant to those licenses, the author-accepted manuscript can be made  
1136 freely available under a CC BY 4.0 license immediately upon publication.,

1137

### 1138 **Author Contributions**

1139 I.L., N.P., D.A., L.V., and D.R. wrote the manuscript and supplementary materials with input  
1140 from all co-authors. A.S.-N., P.F.P., S.M., N.R., R.P. and D.R. supervised different aspects of the  
1141 study. I.L. and N.P. carried out the main genetic analyses. I.L., R.F., H.R., I.O., P.F.P. analyzed  
1142 genetic data. D.A. and L.V. edited archaeological information. D.A., A.Kh., E.K., N.Sh., S.C.A.,  
1143 S.V.A., E.Ba., Z.B., A.B., P.C., A.C., I.C., M.Co., M.Cs, J.D., N.E., S. É, A.Fa., P.F., A.Fr.,  
1144 M.F., A.G., T.Ha., T.Hi., P.Je., V.Kh., V.Ki., A.Kit., A.Ko., G.K., N.N., B.B., P.D., P.Ja., E.Ki.,  
1145 A.Kiy., J.K., P.K., R.M., M.M., E.Me., V.M., E.Mo., J.M., N.M., M.N., O.N., M.R., M.O-G.,  
1146 G.P., S.P., T.S., N.Se., A. Š, M.R.S., I.S., V.Sh., A.Si., K.S., K.N.S., J.T., A.A.T., V.T., S.V.,  
1147 O.F., A.Sz-N., and R.P. sampled anthropological remains and/or contributed to the creation of  
1148 the archaeological supplement. A.A., E.S.B., M.Ma., A.Mi., and S.M. carried out bioinformatic

1149 data processing. K.C., F.C., O.Ch., E.C., L.I., A.Ke., D.K., A.M.L., M.Mi., J.O., L.Q., J.N.W.,  
1150 F.Z., N.R., and carried out wet laboratory work.

1151

### 1152 **Conflict of Interest Statement**

1153 The authors declare no competing interests.

1154

### 1155 **Ethics Statement**

1156 The individuals studied here were all analyzed with the goal of minimizing damage to their  
1157 skeletal remains, with permission from local authorities in each location from which they came.  
1158 Every sample is represented by stewards such as archaeologists or museum curators, who are  
1159 either authors or thanked in the Acknowledgments. Open science principles require making all  
1160 data used to support the conclusions of a study maximally available, and we support these  
1161 principles here by making fully publicly available not only the digital copies of molecules (the  
1162 uploaded sequences) but also the molecular copies (the ancient DNA libraries themselves, which  
1163 constitute molecular data storage). Those researchers who wish to carry out deeper sequencing of  
1164 libraries published in this study should make a request to corresponding author D.R. We commit  
1165 to granting reasonable requests as long as the libraries remain preserved in our laboratories, with  
1166 no requirement that we be included as collaborators or co-authors on any resulting publications.

**Extended Data Table 1: F<sub>ST</sub> values among select populations of the Dnipro, Don, Volga, and Caucasus areas.** F<sub>ST</sub> values are shown below the diagonal and their standard errors above it.

|                            | BPgroup | CoreYamnaya | Ekaterinovka | GK1   | Khi   | KhlopkovBugor | Klo   | Kmed  | Labazy | Maikop | Maximovka | Murzikha | PVgroup | Remontnoye | Russia_Caucasus_LateMaikop | Russia_Don_EBA_Yamnaya | SShi  | SSmed | Syzzzheye | Ukraine_N | Unakozovskaya | UpperVolga |
|----------------------------|---------|-------------|--------------|-------|-------|---------------|-------|-------|--------|--------|-----------|----------|---------|------------|----------------------------|------------------------|-------|-------|-----------|-----------|---------------|------------|
| BPgroup                    |         | 0.001       | 0.001        | 0.003 | 0.001 | 0.002         | 0.001 | 0.001 | 0.002  | 0.001  | 0.002     | 0.001    | 0.002   | 0.002      | 0.005                      | 0.001                  | 0.001 | 0.001 | 0.003     | 0.001     | 0.003         | 0.001      |
| CoreYamnaya                | 0.011   |             | 0.000        | 0.003 | 0.000 | 0.002         | 0.000 | 0.001 | 0.002  | 0.001  | 0.002     | 0.001    | 0.002   | 0.001      | 0.004                      | 0.000                  | 0.001 | 0.001 | 0.002     | 0.001     | 0.002         | 0.000      |
| Ekaterinovka               | 0.030   | 0.032       |              | 0.003 | 0.001 | 0.002         | 0.000 | 0.001 | 0.002  | 0.001  | 0.002     | 0.001    | 0.002   | 0.002      | 0.004                      | 0.000                  | 0.001 | 0.001 | 0.003     | 0.001     | 0.003         | 0.000      |
| GK1                        | 0.042   | 0.041       | 0.045        |       | 0.003 | 0.007         | 0.003 | 0.003 | 0.005  | 0.004  | 0.006     | 0.003    | 0.005   | 0.005      | 0.018                      | 0.003                  | 0.004 | 0.005 | 0.009     | 0.003     | 0.006         | 0.003      |
| Khi                        | 0.007   | 0.014       | 0.019        | 0.039 |       | 0.002         | 0.001 | 0.001 | 0.002  | 0.001  | 0.002     | 0.001    | 0.002   | 0.002      | 0.004                      | 0.001                  | 0.001 | 0.001 | 0.003     | 0.001     | 0.003         | 0.001      |
| KhlopkovBugor              | 0.010   | 0.017       | 0.022        | 0.037 | 0.008 |               | 0.002 | 0.002 | 0.003  | 0.003  | 0.003     | 0.002    | 0.003   | 0.003      | 0.009                      | 0.002                  | 0.003 | 0.003 | 0.005     | 0.002     | 0.004         | 0.002      |
| Klo                        | 0.018   | 0.022       | 0.008        | 0.041 | 0.009 | 0.013         |       | 0.001 | 0.002  | 0.001  | 0.002     | 0.001    | 0.002   | 0.002      | 0.004                      | 0.001                  | 0.001 | 0.001 | 0.003     | 0.001     | 0.003         | 0.001      |
| Kmed                       | 0.014   | 0.018       | 0.015        | 0.042 | 0.006 | -0.002        | 0.002 |       | 0.002  | 0.001  | 0.002     | 0.001    | 0.002   | 0.002      | 0.005                      | 0.001                  | 0.001 | 0.001 | 0.003     | 0.001     | 0.003         | 0.001      |
| Labazy                     | 0.032   | 0.034       | 0.009        | 0.048 | 0.021 | 0.027         | 0.010 | 0.016 |        | 0.002  | 0.003     | 0.002    | 0.003   | 0.003      | 0.007                      | 0.002                  | 0.002 | 0.003 | 0.004     | 0.002     | 0.004         | 0.002      |
| Maikop                     | 0.031   | 0.025       | 0.064        | 0.064 | 0.037 | 0.043         | 0.052 | 0.045 | 0.067  |        | 0.003     | 0.001    | 0.002   | 0.002      | 0.006                      | 0.001                  | 0.002 | 0.002 | 0.003     | 0.001     | 0.003         | 0.001      |
| Maximovka                  | 0.044   | 0.041       | 0.021        | 0.048 | 0.033 | 0.033         | 0.021 | 0.028 | 0.021  | 0.076  |           | 0.002    | 0.003   | 0.003      | 0.007                      | 0.002                  | 0.003 | 0.003 | 0.004     | 0.002     | 0.003         | 0.002      |
| Murzikha                   | 0.056   | 0.053       | 0.034        | 0.065 | 0.044 | 0.047         | 0.034 | 0.039 | 0.034  | 0.088  | 0.018     |          | 0.002   | 0.002      | 0.004                      | 0.001                  | 0.001 | 0.001 | 0.003     | 0.001     | 0.003         | 0.001      |
| PVgroup                    | -0.002  | 0.012       | 0.035        | 0.046 | 0.010 | 0.012         | 0.024 | 0.018 | 0.038  | 0.025  | 0.048     | 0.061    |         | 0.003      | 0.006                      | 0.002                  | 0.002 | 0.003 | 0.004     | 0.002     | 0.003         | 0.002      |
| Remontnoye                 | 0.012   | 0.011       | 0.040        | 0.041 | 0.015 | 0.020         | 0.028 | 0.024 | 0.046  | 0.012  | 0.052     | 0.065    | 0.011   |            | 0.006                      | 0.002                  | 0.002 | 0.002 | 0.004     | 0.002     | 0.003         | 0.002      |
| Russia_Caucasus_LateMaikop | 0.025   | 0.020       | 0.058        | 0.065 | 0.033 | 0.037         | 0.048 | 0.041 | 0.059  | -0.001 | 0.063     | 0.081    | 0.026   | 0.002      |                            | 0.004                  | 0.006 | 0.007 | 0.011     | 0.004     | 0.007         | 0.004      |
| Russia_Don_EBA_Yamnaya     | 0.014   | 0.005       | 0.029        | 0.040 | 0.014 | 0.019         | 0.019 | 0.018 | 0.030  | 0.030  | 0.037     | 0.048    | 0.016   | 0.015      | 0.025                      |                        | 0.001 | 0.001 | 0.003     | 0.001     | 0.003         | 0.001      |
| SShi                       | 0.009   | 0.011       | 0.027        | 0.034 | 0.013 | 0.014         | 0.017 | 0.017 | 0.029  | 0.030  | 0.036     | 0.048    | 0.010   | 0.016      | 0.034                      | 0.011                  |       | 0.002 | 0.004     | 0.001     | 0.003         | 0.001      |
| SSmed                      | 0.011   | 0.010       | 0.021        | 0.034 | 0.011 | 0.012         | 0.015 | 0.015 | 0.021  | 0.030  | 0.030     | 0.041    | 0.013   | 0.014      | 0.019                      | 0.008                  | 0.004 |       | 0.004     | 0.001     | 0.003         | 0.001      |
| Syzzzheye                  | 0.045   | 0.047       | 0.022        | 0.059 | 0.034 | 0.035         | 0.026 | 0.033 | 0.029  | 0.082  | 0.043     | 0.050    | 0.049   | 0.056      | 0.077                      | 0.042                  | 0.040 | 0.034 |           | 0.003     | 0.004         | 0.003      |
| Ukraine_N                  | 0.046   | 0.039       | 0.036        | 0.047 | 0.040 | 0.042         | 0.032 | 0.037 | 0.036  | 0.063  | 0.038     | 0.048    | 0.049   | 0.049      | 0.055                      | 0.029                  | 0.031 | 0.017 | 0.055     |           | 0.003         | 0.001      |
| Unakozovskaya              | 0.059   | 0.057       | 0.094        | 0.090 | 0.068 | 0.069         | 0.083 | 0.076 | 0.096  | 0.034  | 0.107     | 0.117    | 0.058   | 0.039      | 0.030                      | 0.060                  | 0.062 | 0.061 | 0.107     | 0.092     |               | 0.003      |
| UpperVolga                 | 0.044   | 0.040       | 0.021        | 0.048 | 0.033 | 0.035         | 0.019 | 0.028 | 0.019  | 0.073  | 0.015     | 0.027    | 0.049   | 0.051      | 0.067                      | 0.033                  | 0.035 | 0.026 | 0.038     | 0.029     | 0.103         |            |

**Extended Data Table 2: Extraordinary Genetic Homogeneity in the Core Yamnaya.** We tested all populations and individuals for cladality with Samara Yamnaya. We list populations for which this is not rejected ( $p > 0.05$ ) and populations that include individuals that fit Core Yamnaya selection criteria ( $p > 0.2$ , at least 300k SNPs, and Yamnaya or Afanasievo culture).

| Population                                                                                              | P-value | Included in Core Yamnaya | Total individuals |
|---------------------------------------------------------------------------------------------------------|---------|--------------------------|-------------------|
| <b>Populations that are a clade with Samara Yamnaya</b>                                                 |         |                          |                   |
| China_Xinjiang_G218_BA_Afanasievo_oWestEurasia                                                          | 9.7E-01 | 1                        | 1                 |
| Russia_Chelyabinsk_EBA_Yamnaya                                                                          | 9.5E-01 | 5                        | 5                 |
| Russia_Volgograd_EBA_Yamnaya                                                                            | 9.0E-01 | 3                        | 5                 |
| Russia_Ural_EBA_Yamnaya_contam                                                                          | 8.2E-01 | 0                        | 1                 |
| Usatove_EBA                                                                                             | 7.9E-01 | 0                        | 1                 |
| Russia_Ural_EBA_Yamnaya                                                                                 | 7.3E-01 | 5                        | 7                 |
| Russia_Afanasievo_Yenisei                                                                               | 6.7E-01 | 1                        | 1                 |
| Russia_MBA_Poltavka                                                                                     | 6.5E-01 | 0                        | 6                 |
| Romania_EBA_Catacomb                                                                                    | 6.3E-01 | 0                        | 2                 |
| Russia_Orlovka_EBA_Yamnaya                                                                              | 5.5E-01 | 1                        | 1                 |
| Ukraine_MBA                                                                                             | 5.1E-01 | 0                        | 1                 |
| Russia_Samara_EBA_Yamnaya_possible                                                                      | 5.0E-01 | 0                        | 1                 |
| Kazakhstan_EBA_Yamnaya.SG                                                                               | 4.8E-01 | 1                        | 1                 |
| Ukraine_EBA_Yamnaya_contam                                                                              | 4.4E-01 | 0                        | 1                 |
| Russia_LowerVolga_EBA_Yamnaya                                                                           | 3.9E-01 | 0                        | 1                 |
| Moldova_Crasnoe_Eneolithic                                                                              | 3.9E-01 | 0                        | 1                 |
| Russia_EBA_o1.SG                                                                                        | 3.6E-01 | 0                        | 1                 |
| Ukraine_EBA_Catacomb                                                                                    | 3.5E-01 | 0                        | 2                 |
| Ukraine_MBA_Catacomb_o1                                                                                 | 3.4E-01 | 0                        | 1                 |
| Moldova_Eneolithic                                                                                      | 3.3E-01 | 0                        | 1                 |
| Russia_BA_WestManych_Catacomb                                                                           | 3.2E-01 | 0                        | 1                 |
| Mongolia_Chalcolithic_Afanasievo_1                                                                      | 2.9E-01 | 0                        | 1                 |
| Russia_Kalmykia_EBA                                                                                     | 2.8E-01 | 0                        | 1                 |
| Russia_Afanasievo.SG                                                                                    | 2.8E-01 | 0                        | 2                 |
| Russia_UpperOb_Eneolithic_Afanasievo                                                                    | 2.8E-01 | 6                        | 6                 |
| Russia_Volgograd_EBA_Yamnaya_o                                                                          | 2.8E-01 | 0                        | 1                 |
| Russia_Ishkinovka_EBA_Yamnaya                                                                           | 2.5E-01 | 1                        | 1                 |
| Usatove_Yamnaya                                                                                         | 2.1E-01 | 0                        | 1                 |
| Latvia_LN_CordedWare                                                                                    | 1.7E-01 | 0                        | 1                 |
| Hungary_EBA_Yamnaya_1drel.I3510_contam                                                                  | 1.7E-01 | 0                        | 1                 |
| Brillenhohle.pmd                                                                                        | 1.6E-01 | 0                        | 1                 |
| Russia_Steppe_Catacomb                                                                                  | 1.6E-01 | 0                        | 4                 |
| Russia_Volga_EBA_Yamnaya                                                                                | 1.3E-01 | 4                        | 5                 |
| Russia_Kalmykia_EasternManych_EMBA                                                                      | 1.3E-01 | 0                        | 2                 |
| Russia_N_BA_possible                                                                                    | 1.2E-01 | 0                        | 1                 |
| Russia_Afanasievo                                                                                       | 1.2E-01 | 18                       | 29                |
| Moldova_Eneolithic_Suvorove                                                                             | 1.1E-01 | 0                        | 1                 |
| Russia_Afanasievo_Khakassia_possible                                                                    | 9.0E-02 | 0                        | 1                 |
| BOY_EBA                                                                                                 | 8.8E-02 | 0                        | 5                 |
| Russia_Rostov_Steppe_NorthCaucasus_BA                                                                   | 7.4E-02 | 0                        | 1                 |
| Russia_LowerDon_EBA_Yamnaya                                                                             | 6.6E-02 | 0                        | 1                 |
| Moldova_EBA_Yamnaya                                                                                     | 6.5E-02 | 4                        | 16                |
| Ukraine_EBA_Catacomb.SG                                                                                 | 6.2E-02 | 0                        | 1                 |
| Russia_Afanasievo_contam                                                                                | 5.8E-02 | 0                        | 2                 |
| Romania_Brailita_EBA_Yamnaya                                                                            | 5.8E-02 | 0                        | 1                 |
| Slovakia_EBA_Yamnaya                                                                                    | 5.1E-02 | 0                        | 2                 |
| Ukraine_EBA_Yamnaya                                                                                     | 5.1E-02 | 4                        | 9                 |
| <b>Populations that are not a clade with Samara Yamnaya but include at least one individual that is</b> |         |                          |                   |
| Romania_EBA_Yamnaya                                                                                     | 3.9E-02 | 2                        | 8                 |
| Russia_Remontnoye_EBA_Yamnaya                                                                           | 3.5E-02 | 5                        | 6                 |
| Russia_Kalmykia_EBA_Yamnaya.SG                                                                          | 1.8E-02 | 2                        | 6                 |
| Russia_Caucasus_EBA_Yamnaya                                                                             | 1.6E-02 | 1                        | 3                 |
| Hungary_EBA_Yamnaya                                                                                     | 1.5E-04 | 1                        | 5                 |
| Russia_CaspianInland_EBA_Yamnaya                                                                        | 1.2E-04 | 12                       | 26                |
| Russia_UpperYenisey_Eneolithic_Afanasievo                                                               | 2.3E-05 | 1                        | 4                 |
| Russia_Don_EBA_Yamnaya                                                                                  | 2.8E-50 | 2                        | 23                |

**Extended Data Table 3:  $F_{ST}$  values among populations that include Core Yamnaya individuals.**  $F_{ST}$  values are shown below the diagonal and their standard errors above it.

|                                          | Hungary_EBA_Yamnaya | Moldova_EBA_Yamnaya | Romania_EBA_Yamnaya | Russia_Afnasievo | Russia_CaspianInland_EBA_Yamnaya | Russia_Caucasus_EBA_Yamnaya | Russia_Chelyabinsk_EBA_Yamnaya | Russia_Don_EBA_Yamnaya | Russia_Kalmykia_EBA_Yamnaya.SG | Russia_Remontnoye_EBA_Yamnaya | Russia_Samara_EBA_Yamnaya | Russia_UpperOb_Eneolithic_Afnasievo | Russia_UpperYenisey_Eneolithic_Afnasievo | Russia_Ural_EBA_Yamnaya | Russia_Volga_EBA_Yamnaya | Russia_Volgograd_EBA_Yamnaya | Ukraine_EBA_Yamnaya |
|------------------------------------------|---------------------|---------------------|---------------------|------------------|----------------------------------|-----------------------------|--------------------------------|------------------------|--------------------------------|-------------------------------|---------------------------|-------------------------------------|------------------------------------------|-------------------------|--------------------------|------------------------------|---------------------|
| Hungary_EBA_Yamnaya                      |                     | 0.001               | 0.001               | 0.001            | 0.001                            | 0.002                       | 0.001                          | 0.001                  | 0.001                          | 0.001                         | 0.001                     | 0.001                               | 0.001                                    | 0.001                   | 0.001                    | 0.001                        | 0.001               |
| Moldova_EBA_Yamnaya                      | 0.001               |                     | 0.001               | 0.000            | 0.000                            | 0.001                       | 0.001                          | 0.000                  | 0.001                          | 0.001                         | 0.000                     | 0.001                               | 0.001                                    | 0.001                   | 0.001                    | 0.001                        | 0.001               |
| Romania_EBA_Yamnaya                      | 0.001               | 0.001               |                     | 0.001            | 0.001                            | 0.002                       | 0.001                          | 0.001                  | 0.001                          | 0.001                         | 0.001                     | 0.001                               | 0.001                                    | 0.001                   | 0.001                    | 0.001                        | 0.001               |
| Russia_Afnasievo                         | 0.006               | 0.004               | 0.005               |                  | 0.000                            | 0.001                       | 0.001                          | 0.000                  | 0.001                          | 0.001                         | 0.000                     | 0.001                               | 0.001                                    | 0.001                   | 0.001                    | 0.001                        | 0.001               |
| Russia_CaspianInland_EBA_Yamnaya         | 0.004               | 0.003               | 0.002               | 0.006            |                                  | 0.001                       | 0.001                          | 0.000                  | 0.001                          | 0.001                         | 0.000                     | 0.001                               | 0.001                                    | 0.001                   | 0.001                    | 0.001                        | 0.001               |
| Russia_Caucasus_EBA_Yamnaya              | 0.001               | 0.002               | 0.001               | 0.003            | 0.003                            |                             | 0.002                          | 0.001                  | 0.002                          | 0.002                         | 0.001                     | 0.002                               | 0.002                                    | 0.002                   | 0.002                    | 0.002                        | 0.002               |
| Russia_Chelyabinsk_EBA_Yamnaya           | 0.008               | 0.009               | 0.009               | 0.010            | 0.009                            | 0.009                       |                                | 0.001                  | 0.001                          | 0.001                         | 0.001                     | 0.001                               | 0.001                                    | 0.001                   | 0.001                    | 0.001                        | 0.001               |
| Russia_Don_EBA_Yamnaya                   | 0.006               | 0.005               | 0.006               | 0.008            | 0.006                            | 0.005                       | 0.012                          |                        | 0.001                          | 0.001                         | 0.000                     | 0.001                               | 0.001                                    | 0.001                   | 0.001                    | 0.001                        | 0.001               |
| Russia_Kalmykia_EBA_Yamnaya.SG           | 0.007               | 0.005               | 0.004               | 0.005            | 0.001                            | 0.004                       | 0.011                          | 0.007                  |                                | 0.001                         | 0.001                     | 0.001                               | 0.001                                    | 0.001                   | 0.001                    | 0.001                        | 0.001               |
| Russia_Remontnoye_EBA_Yamnaya            | 0.004               | 0.004               | 0.003               | 0.004            | 0.000                            | 0.003                       | 0.010                          | 0.006                  | -0.049                         |                               | 0.001                     | 0.001                               | 0.001                                    | 0.001                   | 0.001                    | 0.001                        | 0.001               |
| Russia_Samara_EBA_Yamnaya                | 0.003               | 0.002               | 0.003               | 0.005            | 0.003                            | 0.003                       | 0.008                          | 0.005                  | 0.005                          | 0.004                         |                           | 0.001                               | 0.001                                    | 0.001                   | 0.001                    | 0.001                        | 0.001               |
| Russia_UpperOb_Eneolithic_Afnasievo      | 0.006               | 0.005               | 0.004               | 0.002            | 0.003                            | 0.006                       | 0.010                          | 0.008                  | 0.001                          | 0.003                         | 0.004                     |                                     | 0.001                                    | 0.001                   | 0.001                    | 0.001                        | 0.001               |
| Russia_UpperYenisey_Eneolithic_Afnasievo | 0.011               | 0.010               | 0.008               | 0.009            | 0.009                            | 0.009                       | 0.015                          | 0.012                  | 0.009                          | 0.007                         | 0.010                     | 0.006                               |                                          | 0.001                   | 0.001                    | 0.001                        | 0.001               |
| Russia_Ural_EBA_Yamnaya                  | 0.002               | 0.002               | 0.001               | 0.004            | 0.003                            | 0.003                       | 0.006                          | 0.005                  | 0.004                          | 0.003                         | 0.001                     | 0.003                               | 0.008                                    |                         | 0.001                    | 0.001                        | 0.001               |
| Russia_Volga_EBA_Yamnaya                 | 0.004               | 0.004               | 0.003               | 0.005            | 0.005                            | 0.005                       | 0.007                          | 0.007                  | 0.008                          | 0.007                         | 0.003                     | 0.007                               | 0.011                                    | 0.003                   |                          | 0.001                        | 0.001               |
| Russia_Volgograd_EBA_Yamnaya             | 0.005               | 0.003               | 0.004               | 0.007            | 0.005                            | 0.004                       | 0.009                          | 0.007                  | 0.007                          | 0.005                         | 0.004                     | 0.007                               | 0.009                                    | 0.003                   | 0.006                    |                              | 0.001               |
| Ukraine_EBA_Yamnaya                      | 0.003               | 0.001               | 0.001               | 0.004            | 0.002                            | 0.002                       | 0.008                          | 0.005                  | 0.003                          | 0.003                         | 0.002                     | 0.004                               | 0.009                                    | 0.001                   | 0.004                    | 0.004                        |                     |

**Extended Data Table 4: *qpAdm* models that fit non-Core Yamnaya.** We use the following sources to model Yamnaya-related populations other than the Core and Don Yamnaya: CoreYamnaya, Romania\_C\_Bodrogkeresztur, Romania\_N, Serbia\_IronGates\_Mesolithic, Trypillia, Ukraine\_N, Usatove. The Baden individuals from Hungary represent a reburial into a kurgan<sup>82</sup> and are predominantly of European farmer, not Yamnaya, ancestry. The Riltsi individual is shown with Usatove ancestry here and can also be modeled with about half Remontnoye ancestry, as the Usatove have ancestry from the CLV cline.<sup>15</sup>

| Modeled group                   | A                           | B                           | P-value | A     | B     | S.E. |
|---------------------------------|-----------------------------|-----------------------------|---------|-------|-------|------|
| Bulgaria_C_ProtoYamnaya         | Serbia_IronGates_Mesolithic | Usatove                     | 0.062   | 17.5% | 82.5% | 2.4% |
| Bulgaria_EBA_Yamnaya            | CoreYamnaya                 | Romania_C_Bodrogkeresztur   | 0.883   | 85.4% | 14.6% | 1.4% |
| Bulgaria_EBA_Yamnaya            | CoreYamnaya                 | Romania_N                   | 0.682   | 86.7% | 13.3% | 1.3% |
| Bulgaria_EBA_Yamnaya            | CoreYamnaya                 | Trypillia                   | 0.719   | 82.9% | 17.1% | 1.7% |
| Bulgaria_EBA_Yamnaya            | CoreYamnaya                 | Usatove                     | 0.396   | 66.7% | 33.3% | 3.3% |
| Bulgaria_Riltsi_EBA_Yamnaya     | Romania_N                   | Usatove                     | 0.079   | 25.3% | 74.7% | 5.8% |
| Hungary_LateC_EBA_Baden_Yamnaya | CoreYamnaya                 | Romania_C_Bodrogkeresztur   | 0.113   | 3.4%  | 96.6% | 1.5% |
| Hungary_LateC_EBA_Baden_Yamnaya | Romania_C_Bodrogkeresztur   | Serbia_IronGates_Mesolithic | 0.309   | 95.9% | 4.1%  | 1.4% |
| Hungary_LateC_EBA_Baden_Yamnaya | Romania_C_Bodrogkeresztur   | Trypillia                   | 0.114   | 77.6% | 22.4% | 9.7% |
| Hungary_LateC_EBA_Baden_Yamnaya | Romania_C_Bodrogkeresztur   | Ukraine_N                   | 0.197   | 96.2% | 3.8%  | 1.5% |
| Hungary_LateC_EBA_Baden_Yamnaya | Romania_C_Bodrogkeresztur   | Usatove                     | 0.099   | 94.2% | 5.8%  | 2.5% |
| Hungary_LateC_EBA_Baden_Yamnaya | Romania_N                   | Serbia_IronGates_Mesolithic | 0.323   | 87.0% | 13.0% | 1.7% |
| Hungary_LateC_EBA_Baden_Yamnaya | Romania_N                   | Ukraine_N                   | 0.094   | 86.9% | 13.1% | 1.7% |
| Moldova_EBA_Yamnaya             | CoreYamnaya                 | Romania_C_Bodrogkeresztur   | 0.724   | 93.8% | 6.2%  | 0.9% |
| Moldova_EBA_Yamnaya             | CoreYamnaya                 | Romania_N                   | 0.571   | 94.3% | 5.7%  | 0.8% |
| Moldova_EBA_Yamnaya             | CoreYamnaya                 | Trypillia                   | 0.675   | 92.7% | 7.3%  | 1.0% |
| Moldova_EBA_Yamnaya             | CoreYamnaya                 | Usatove                     | 0.367   | 86.0% | 14.0% | 2.2% |
| Moldova_GlobularAmphora_Yamnaya | CoreYamnaya                 | Trypillia                   | 0.053   | 88.7% | 11.3% | 2.6% |
| Romania_Brailita_EBA_Yamnaya    | CoreYamnaya                 | Romania_C_Bodrogkeresztur   | 0.561   | 91.6% | 8.4%  | 2.4% |
| Romania_Brailita_EBA_Yamnaya    | CoreYamnaya                 | Romania_N                   | 0.524   | 92.4% | 7.6%  | 2.1% |
| Romania_Brailita_EBA_Yamnaya    | CoreYamnaya                 | Trypillia                   | 0.601   | 90.1% | 9.9%  | 2.8% |
| Romania_Brailita_EBA_Yamnaya    | CoreYamnaya                 | Usatove                     | 0.509   | 81.0% | 19.0% | 5.6% |
| Romania_EBA_Yamnaya             | CoreYamnaya                 | Romania_N                   | 0.096   | 95.8% | 4.2%  | 1.0% |
| Romania_EBA_Yamnaya             | CoreYamnaya                 | Usatove                     | 0.143   | 89.1% | 10.9% | 2.5% |
| Serbia_EBA_Yamnaya              | CoreYamnaya                 | Romania_C_Bodrogkeresztur   | 0.196   | 87.3% | 12.7% | 2.0% |
| Serbia_EBA_Yamnaya              | CoreYamnaya                 | Romania_N                   | 0.097   | 88.6% | 11.4% | 1.9% |
| Serbia_EBA_Yamnaya              | CoreYamnaya                 | Trypillia                   | 0.200   | 85.1% | 14.9% | 2.3% |
| Ukraine_EBA_Yamnaya             | CoreYamnaya                 | Romania_C_Bodrogkeresztur   | 0.561   | 93.3% | 6.7%  | 1.3% |
| Ukraine_EBA_Yamnaya             | CoreYamnaya                 | Romania_N                   | 0.481   | 94.0% | 6.0%  | 1.2% |
| Ukraine_EBA_Yamnaya             | CoreYamnaya                 | Trypillia                   | 0.756   | 92.0% | 8.0%  | 1.5% |
| Ukraine_EBA_Yamnaya             | CoreYamnaya                 | Usatove                     | 0.534   | 84.5% | 15.5% | 3.1% |



**Extended Data Table 5: Cross-regional shared Identity-by-Descent (IBD) segments.** We list all segments  $\geq 12\text{cM}$  shared between individuals from two different regions defined as follows: “Dnipro cline”: CoreYamnaya, GK1, GK2, Russia\_Don\_EBA\_Yamnaya, SShi, SSlo, SSmed, Ukraine\_N; “Volga cline”: Ekaterinovka, Khi, KhlopkovBugor, Klo, Kmed, Labazy, Lebyazhinka\_HG, Maximovka, Murzikha, Syezzhey, UpperVolga; “Caucasus-Lower Volga Eneolithic”: BPgroup, PVgroup; “CLV-South”: Remontnoye, Maikop, Unakozovskaya, Armenia\_C, TUR\_C\_Kalehöyük\_MLBA, TUR\_C\_Ovaören\_EBA

| Individual 1      | Individual 2 | Group 1                                   | Group 2                   | Segment length (cM) |
|-------------------|--------------|-------------------------------------------|---------------------------|---------------------|
| I22201            | I1924        | BPgroup                                   | SShi                      | 35.8                |
| I22202            | I6734        | BPgroup                                   | Khi                       | 32.1                |
| I1634             | I22199       | Armenia_C                                 | BPgroup                   | 31.4                |
| I6300_enhanced    | I22202       | KhlopkovBugor                             | BPgroup                   | 22.0                |
| I6406             | I22200       | Kmed                                      | BPgroup                   | 20.1                |
| PG2004            | I11837       | BPgroup                                   | Khi                       | 18.4                |
| I6301_enhanced    | I22199       | KhlopkovBugor                             | BPgroup                   | 18.2                |
| I6301_enhanced    | PG2001       | KhlopkovBugor                             | PVgroup                   | 17.6                |
| I28683            | PG2004       | Remontnoye                                | BPgroup                   | 16.6                |
| I10567            | I28682       | Russia_CaspianInland_EBA_Yamnaya          | Remontnoye                | 16.2                |
| PG2001            | I3950        | PVgroup                                   | Russia_Afanasiovo         | 15.9                |
| PG2001            | I6062        | PVgroup                                   | Ekaterinovka              | 15.9                |
| I22199            | I8282        | BPgroup                                   | Ekaterinovka              | 15.8                |
| I22201            | I10208       | BPgroup                                   | Moldova_EBA_Yamnaya       | 15.5                |
| I1924             | I20188       | SShi                                      | Klo                       | 15.4                |
| I32501            | I8448        | Russia_UpperYenisey_Eneolithic_Afanasiovo | Murzikha                  | 15.4                |
| I12637            | I8457        | Moldova_EBA_Yamnaya                       | Murzikha                  | 15.4                |
| I32821            | I8449        | Russia_UpperOb_Eneolithic_Afanasiovo      | Murzikha                  | 15.4                |
| MA2213_wNonUDG.SG | VJ1001       | TUR_C_Ovaören_EBA                         | PVgroup                   | 15.2                |
| I32501            | I8455        | Russia_UpperYenisey_Eneolithic_Afanasiovo | Murzikha                  | 15.2                |
| I6301_enhanced    | I22199       | KhlopkovBugor                             | BPgroup                   | 14.9                |
| I8411_enhanced    | I26785       | UpperVolga                                | Russia_Don_EBA_Yamnaya    | 14.9                |
| I22201            | I1924        | BPgroup                                   | SShi                      | 14.8                |
| I22199            | I28682       | BPgroup                                   | Remontnoye                | 14.8                |
| I0122             | I22202       | Klo                                       | BPgroup                   | 14.6                |
| I32501            | I8454        | Russia_UpperYenisey_Eneolithic_Afanasiovo | Murzikha                  | 14.5                |
| I22199            | I6734        | BPgroup                                   | Khi                       | 14.5                |
| I22201            | I11752       | BPgroup                                   | Russia_Afanasiovo         | 14.3                |
| I6064             | I22199       | Ekaterinovka                              | BPgroup                   | 14.2                |
| I0122             | I22199       | Klo                                       | BPgroup                   | 14.2                |
| I1634             | I1924        | Armenia_C                                 | SShi                      | 13.9                |
| I6301_enhanced    | I22201       | KhlopkovBugor                             | BPgroup                   | 13.9                |
| I6918             | I8446        | Russia_Volgograd_EBA_Yamnaya              | Maximovka                 | 13.9                |
| I22202            | I6739        | BPgroup                                   | Khi                       | 13.9                |
| PG2004            | I23651       | BPgroup                                   | Ekaterinovka              | 13.7                |
| I0357             | I11842       | Russia_Samara_EBA_Yamnaya                 | Murzikha                  | 13.7                |
| I22202            | I3952        | BPgroup                                   | Russia_Afanasiovo         | 13.7                |
| I0122             | I20190       | Klo                                       | Russia_Samara_EBA_Yamnaya | 13.6                |
| I8951             | I11842       | Russia_Don_EBA_Yamnaya                    | Murzikha                  | 13.5                |
| PG2004            | I8290        | BPgroup                                   | Ekaterinovka              | 13.4                |
| I0231             | I8456        | Russia_Samara_EBA_Yamnaya                 | Murzikha                  | 13.4                |
| I25159            | I22199       | Russia_Afanasiovo                         | BPgroup                   | 13.3                |
| I4111             | I6109        | Ukraine_N                                 | Klo                       | 13.3                |
| I22199            | I26787       | BPgroup                                   | Russia_Don_EBA_Yamnaya    | 13.3                |
| I6301_enhanced    | PG2004       | KhlopkovBugor                             | BPgroup                   | 12.9                |
| I8449             | I2105        | Murzikha                                  | Ukraine_EBA_Yamnaya       | 12.9                |
| I20189            | I22200       | Ekaterinovka                              | BPgroup                   | 12.8                |
| I6297             | I22201       | Russia_Orlovka_EBA_Yamnaya                | BPgroup                   | 12.8                |
| I6705             | I28682       | Russia_Samara_EBA_Yamnaya                 | Remontnoye                | 12.8                |
| I32821            | I22200       | Russia_UpperOb_Eneolithic_Afanasiovo      | BPgroup                   | 12.7                |
| I32501            | I8449        | Russia_UpperYenisey_Eneolithic_Afanasiovo | Murzikha                  | 12.6                |
| I22201            | I6739        | BPgroup                                   | Khi                       | 12.4                |
| I0231             | I28682       | Russia_Samara_EBA_Yamnaya                 | Remontnoye                | 12.3                |
| PG2004            | I6739        | BPgroup                                   | Khi                       | 12.3                |
| I6918             | I22200       | Russia_Volgograd_EBA_Yamnaya              | BPgroup                   | 12.3                |
| I22201            | I3952        | BPgroup                                   | Russia_Afanasiovo         | 12.2                |
| I6406             | I1450        | Kmed                                      | Russia_Samara_EBA_Yamnaya | 12.2                |
| I22199            | I5273        | BPgroup                                   | Russia_Afanasiovo         | 12.1                |
| I4114             | I12964       | Ukraine_N                                 | UpperVolga                | 12.1                |
| I11838            | I23651       | Russia_Volga_EBA_Yamnaya                  | Ekaterinovka              | 12.0                |
| I6907             | I11841       | Russia_Samara_EBA_Yamnaya                 | Murzikha                  | 12.0                |
| I22201            | I1924        | BPgroup                                   | SShi                      | 12.0                |

**Extended Data Figure 1: The origin of Central Anatolian Bronze Age.** (a) Fitting models include Mesopotamian (Çayönü) and steppe ancestry. (b) Models with western sources from Southeastern Europe fail except those with Maikop or Boyanovo EBA sources both of which are Yamnaya-derived. (c) The steppe (BPgroup)+Çayönü model fails all Chalcolithic/Bronze Anatolians except Central Anatolian Bronze Age. (d) Steppe (BPgroup) ancestry observed in all individuals of the Central Anatolian Bronze Age ( $\pm 3s.e.$  shown). (e) BPgroup-related ancestry admixed with different substrata: Aknashen-related in the North Caucasus Maikop, Masis Blur-related in Chalcolithic Armenia, and Mesopotamian-related (Çayönü) in the ancestors of the Central Asian Bronze Age, following the route (f) from the North Caucasus to Anatolia.

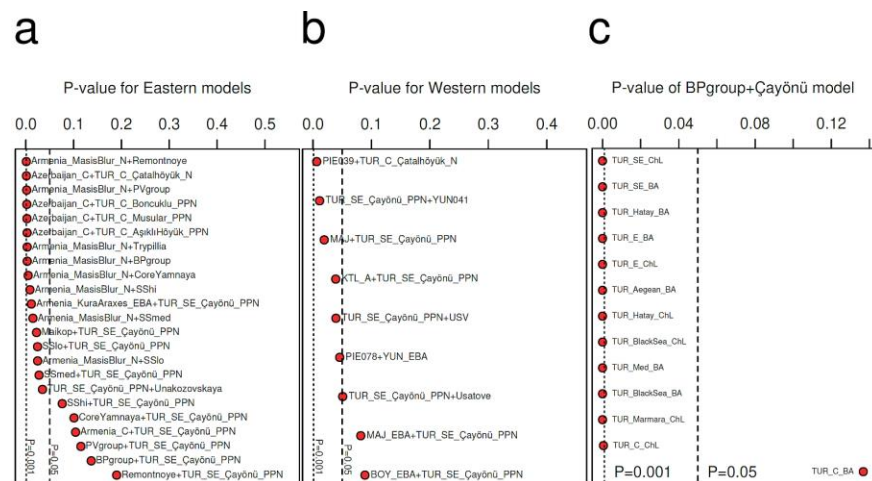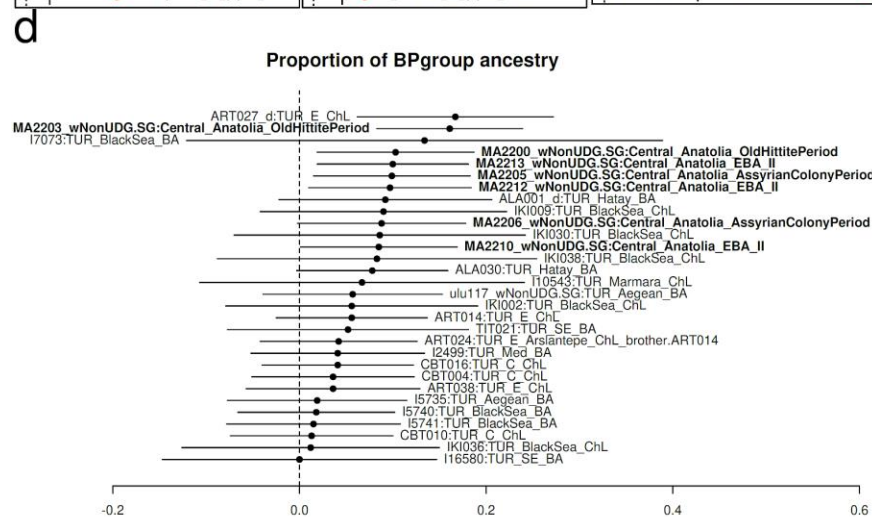

**e**

| Test             | Substratum                 | P-value         | BPgroup Proportion | Std. error  |
|------------------|----------------------------|-----------------|--------------------|-------------|
| Maikop           | TUR_SE_Çayönü_PPN          | 1.07E-36        | 34.4%              | 1.8%        |
| Maikop           | Armenia_MasisBlur_N        | 1.02E-08        | 26.9%              | 2.3%        |
| <b>Maikop</b>    | <b>Armenia_Aknashen_N</b>  | <b>1.70E-01</b> | <b>14.5%</b>       | <b>2.9%</b> |
| Armenia_C        | TUR_SE_Çayönü_PPN          | 6.32E-04        | 31.1%              | 1.8%        |
| <b>Armenia_C</b> | <b>Armenia_MasisBlur_N</b> | <b>7.82E-01</b> | <b>27.2%</b>       | <b>2.2%</b> |
| Armenia_C        | Armenia_Aknashen_N         | 9.06E-10        | 12.0%              | 3.2%        |
| <b>TUR_C_BA</b>  | <b>TUR_SE_Çayönü_PPN</b>   | <b>1.37E-01</b> | <b>10.8%</b>       | <b>1.7%</b> |
| TUR_C_BA         | Armenia_MasisBlur_N        | 2.92E-03        | 5.9%               | 2.4%        |
| TUR_C_BA         | Armenia_Aknashen_N         | 2.10E-17        | -15.8%             | 3.8%        |

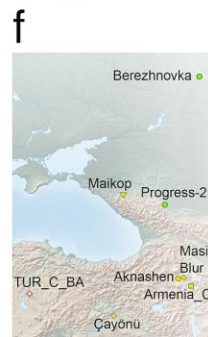

**Extended Data Figure 2: Admixture time estimates.** We estimate admixture times for the Core Yamnaya as a mixture of European hunter-gatherer and West Asian populations (a), for the Don Yamnaya as a mixture of Core Yamnaya and UNHG (b), for the Bulgaria-Moldova-Romania-Serbia (BMRS) Yamnaya as a mixture of Core Yamnaya and European Neolithic/Chalcolithic farmers (c), for the Corded Ware as a mixture of Core Yamnaya and Globula Amphora (d), and for Caucasus-Anatolia populations (Maikop-Armenia\_C-TUR\_C\_BA) as a mixture of European hunter-gatherer and West Asian populations which occurred ca. 4400BCE (e). The Core Yamnaya were formed ca. 4000BCE, followed by admixture ca. 3350 BCE with UNHG and European farmers in the east and west of the Dniro-Don region and <3000BCE in central-eastern Europe.

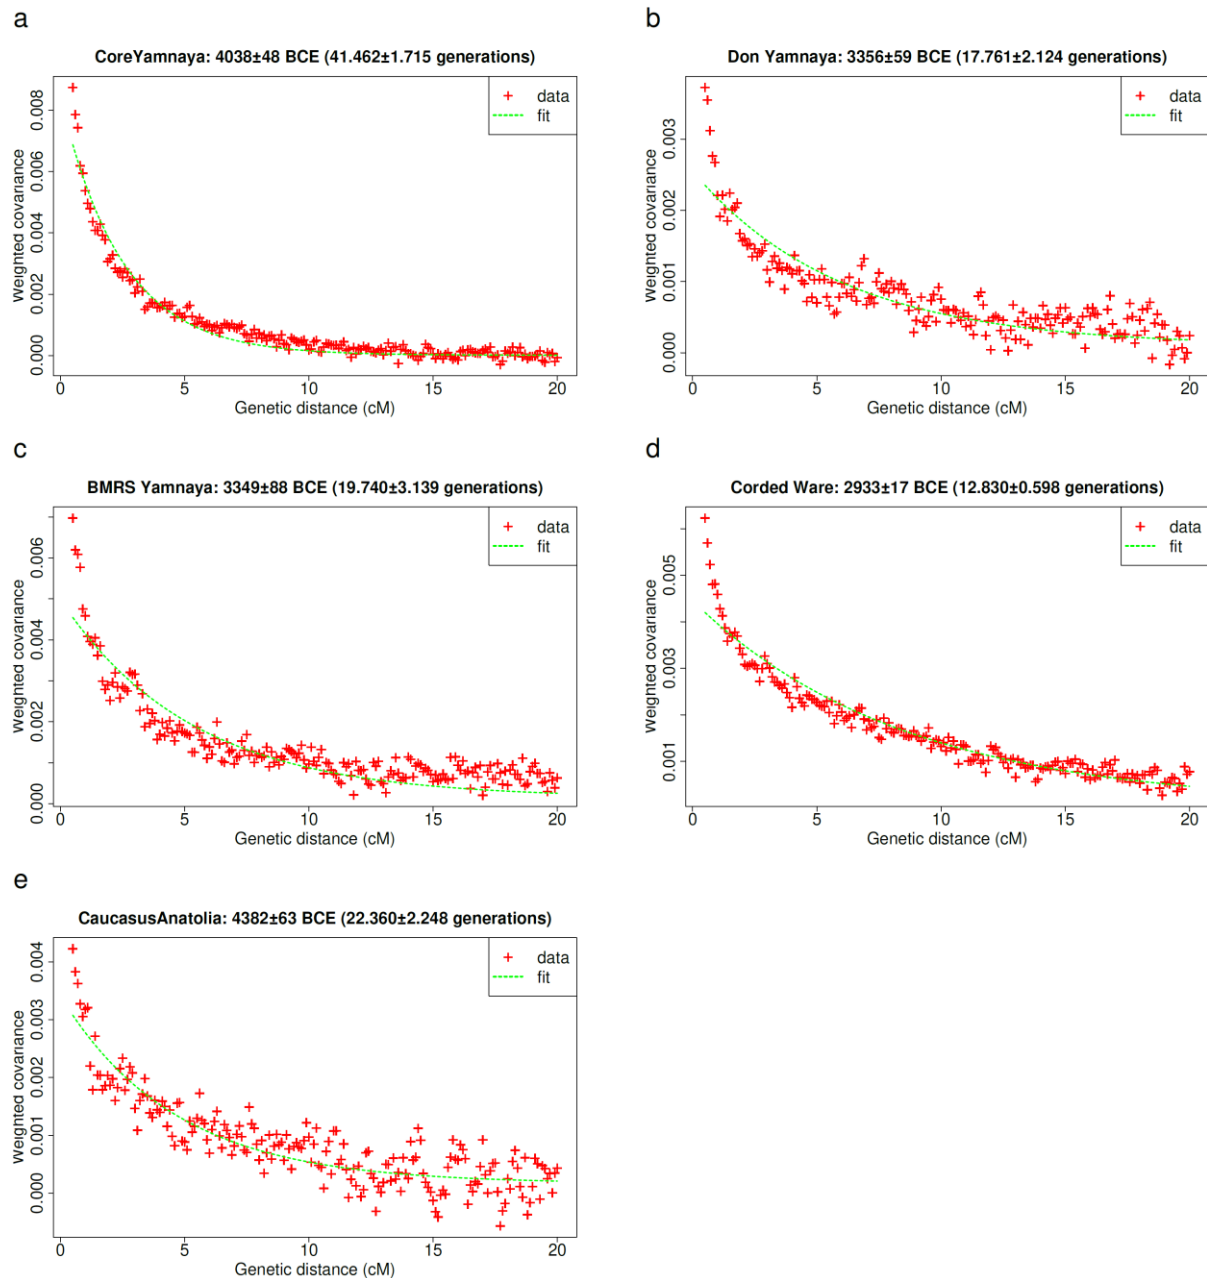

**Extended Data Figure 3:** A 4-way model for the entire Dnipro-Don-Volga-Caucasus region. Error bars show  $\pm 1$  standard error.

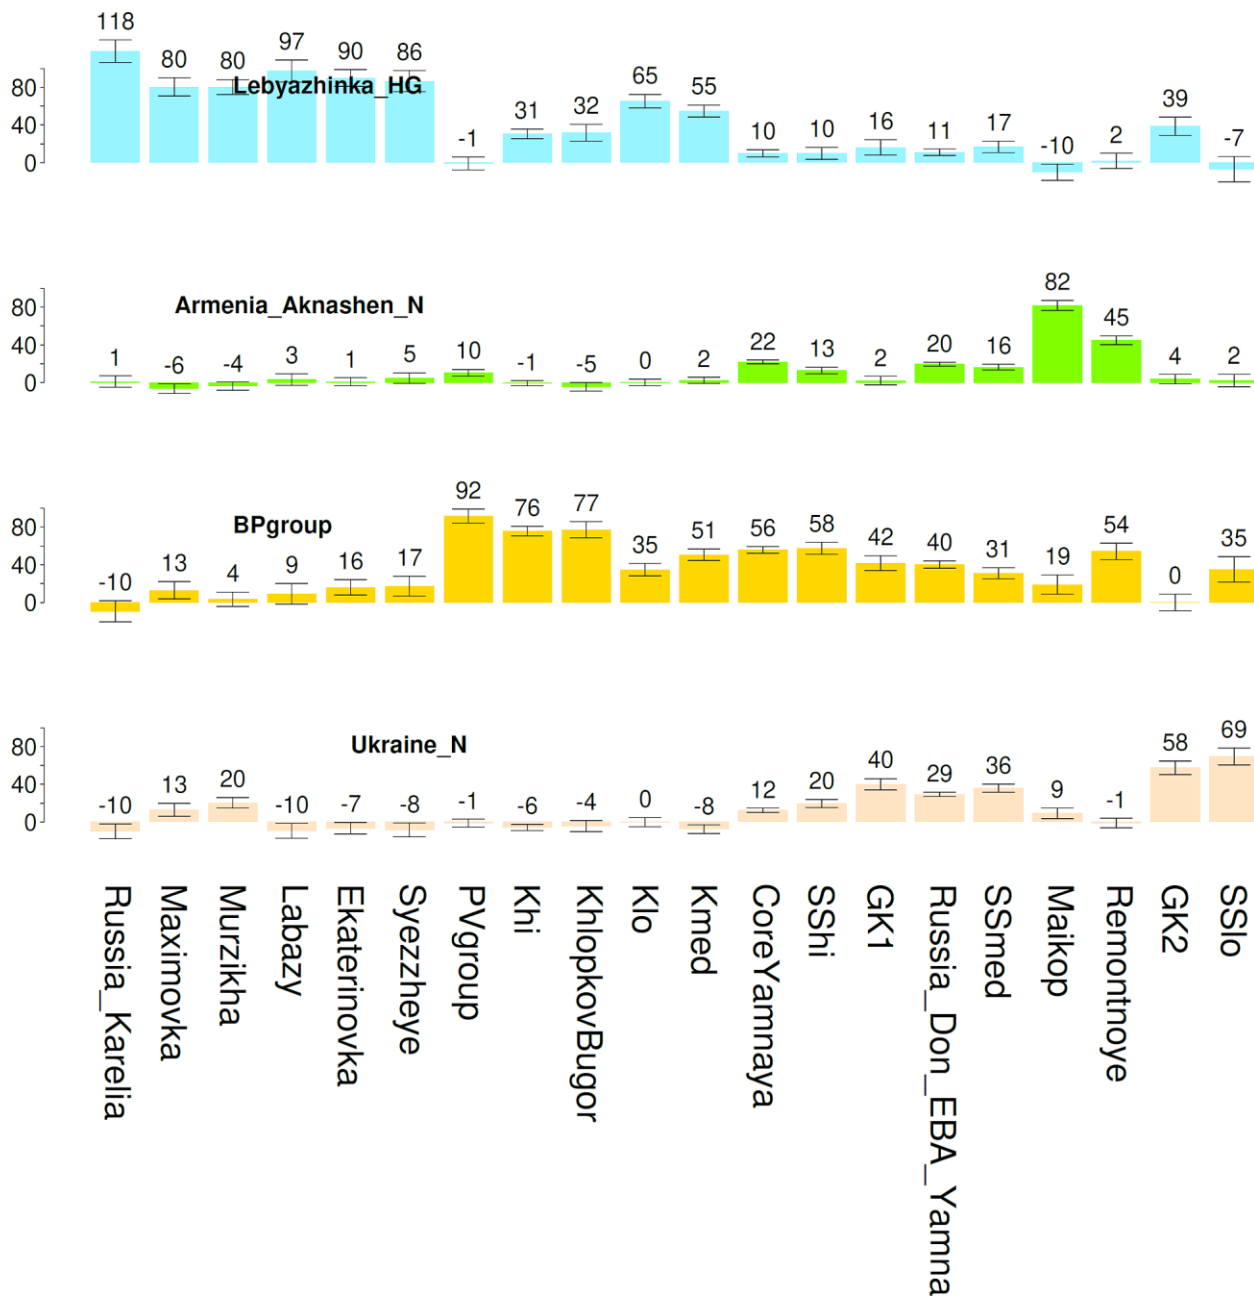

## **Online Tables**

**Online Table 1: Ancient individuals with newly reported genome-wide data.**

**Online Table 2: Technical details of newly reported ancient DNA libraries.**

**Online Table 3: Newly reported direct radiocarbon dates.**

**Online Table 4: All ancient individuals including in genome-wide analysis.**

## References

- 1167 1 Anthony, D. W. *The horse, the wheel, and language : how bronze-age riders from the*  
1168 *Eurasian steppes shaped the modern world*. (Princeton University Press, 2007).
- 1169 2 Haak, W. *et al.* Massive migration from the steppe was a source for Indo-European  
1170 languages in Europe. *Nature* **522**, 207-211, doi:10.1038/nature14317 (2015).
- 1171 3 Olalde, I. *et al.* The Beaker phenomenon and the genomic transformation of northwest  
1172 Europe. *Nature* **555**, 190-196, doi:10.1038/nature25738 (2018).
- 1173 4 Narasimhan Vagheesh, M. *et al.* The formation of human populations in South and  
1174 Central Asia. *Science* **365**, eaat7487, doi:10.1126/science.aat7487 (2019).
- 1175 5 Wang, C.-C. *et al.* Ancient human genome-wide data from a 3000-year interval in the  
1176 Caucasus corresponds with eco-geographic regions. *Nature Communications* **10**, 590,  
1177 doi:10.1038/s41467-018-08220-8 (2019).
- 1178 6 Lazaridis, I. *et al.* The genetic history of the Southern Arc: A bridge between West Asia  
1179 and Europe. *Science* **377**, eabm4247, doi:10.1126/science.abm4247 (2022).
- 1180 7 Allentoft, M. E. *et al.* Population genomics of post-glacial western Eurasia. *Nature* **625**,  
1181 301-311, doi:10.1038/s41586-023-06865-0 (2024).
- 1182 8 Jones, E. R. *et al.* Upper Palaeolithic genomes reveal deep roots of modern Eurasians.  
1183 *Nat Commun* **6**, 8912, doi:10.1038/ncomms9912 (2015).
- 1184 9 Lazaridis, I. *et al.* Genomic insights into the origin of farming in the ancient Near East.  
1185 *Nature* **536**, 419-424, doi:10.1038/nature19310 (2016).
- 1186 10 Lazaridis, I. *et al.* Ancient DNA from Mesopotamia suggests distinct Pre-Pottery and  
1187 Pottery Neolithic migrations into Anatolia. *Science* **377**, 982-987,  
1188 doi:10.1126/science.abq0762 (2022).
- 1189 11 Skourtanioti, E. *et al.* Genomic History of Neolithic to Bronze Age Anatolia, Northern  
1190 Levant, and Southern Caucasus. *Cell* **181**, 1158-1175 e1128,  
1191 doi:10.1016/j.cell.2020.04.044 (2020).
- 1192 12 Lazaridis, I. *et al.* Ancient human genomes suggest three ancestral populations for  
1193 present-day Europeans. *Nature* **513**, 409-413, doi:10.1038/nature13673 (2014).
- 1194 13 Mathieson, I. *et al.* The genomic history of southeastern Europe. *Nature* **555**, 197-203,  
1195 doi:10.1038/nature25778 (2018).
- 1196 14 Tian Chen, Z. *et al.* Postglacial genomes from foragers across Northern Eurasia reveal  
1197 prehistoric mobility associated with the spread of the Uralic and Yeniseian languages.  
1198 *bioRxiv*, 2023.2010.2001.560332, doi:10.1101/2023.10.01.560332 (2023).
- 1199 15 Nikitin, A. G., Lazaridis, I. & others. A genomic history of the North Pontic Region from  
1200 the Neolithic to the Bronze Age. *In submission* (2024).
- 1201 16 Gelabert, P. *et al.* Genomes from Verteba cave suggest diversity within the Trypillians in  
1202 Ukraine. *Scientific Reports* **12**, 7242, doi:10.1038/s41598-022-11117-8 (2022).
- 1203 17 Mathieson, I. *et al.* Genome-wide patterns of selection in 230 ancient Eurasians. *Nature*  
1204 **528**, 499-503, doi:10.1038/nature16152 (2015).
- 1205 18 Mattila, T. M. *et al.* Genetic continuity, isolation, and gene flow in Stone Age Central  
1206 and Eastern Europe. *Communications Biology* **6**, 793, doi:10.1038/s42003-023-05131-3  
1207 (2023).
- 1208 19 Posth, C. *et al.* Palaeogenomics of Upper Palaeolithic to Neolithic European hunter-  
1209 gatherers. *Nature* **615**, 117-126, doi:10.1038/s41586-023-05726-0 (2023).
- 1210 20 Saag, L. *et al.* Genetic ancestry changes in Stone to Bronze Age transition in the East  
1211 European plain. *Science Advances* **7**, eabd6535, doi:10.1126/sciadv.abd6535 (2021).

- 1212 21 Allentoft, M. E. *et al.* Population genomics of Bronze Age Eurasia. *Nature* **522**, 167-172,  
1213 doi:10.1038/nature14507 (2015).
- 1214 22 de Barros Damgaard, P. *et al.* The first horse herders and the impact of early Bronze Age  
1215 steppe expansions into Asia. *Science* **360**, doi:10.1126/science.aar7711 (2018).
- 1216 23 Järve, M. *et al.* Shifts in the Genetic Landscape of the Western Eurasian Steppe  
1217 Associated with the Beginning and End of the Scythian Dominance. *Current Biology* **29**,  
1218 2430-2441.e2410, doi:<https://doi.org/10.1016/j.cub.2019.06.019> (2019).
- 1219 24 Jeong, C. *et al.* A Dynamic 6,000-Year Genetic History of Eurasia's Eastern Steppe. *Cell*  
1220 **183**, 890-904.e829, doi:10.1016/j.cell.2020.10.015 (2020).
- 1221 25 Kumar, V. *et al.* Bronze and Iron Age population movements underlie Xinjiang  
1222 population history. *Science* **376**, 62-69, doi:10.1126/science.abk1534 (2022).
- 1223 26 Patterson, N. *et al.* Large-scale migration into Britain during the Middle to Late Bronze  
1224 Age. *Nature* **601**, 588-594, doi:10.1038/s41586-021-04287-4 (2022).
- 1225 27 Olalde, I. *et al.* The genomic history of the Iberian Peninsula over the past 8000 years.  
1226 *Science* **363**, 1230, doi:10.1126/science.aav4040 (2019).
- 1227 28 Zhang, F. *et al.* The genomic origins of the Bronze Age Tarim Basin mummies. *Nature*  
1228 **599**, 256-261, doi:10.1038/s41586-021-04052-7 (2021).
- 1229 29 Wang, C.-C. *et al.* Genomic insights into the formation of human populations in East  
1230 Asia. *Nature* **591**, 413-419, doi:10.1038/s41586-021-03336-2 (2021).
- 1231 30 Reich, D. *et al.* Reconstructing Native American population history. *Nature* **488**, 370-  
1232 374, doi:10.1038/nature11258 (2012).
- 1233 31 Vybornov, A. *et al.* Diet and Chronology of Neolithic-Eneolithic Cultures (from 6500 to  
1234 4700 cal BC) in the Lower Volga Basin. *Radiocarbon* **60**, 1597-1610,  
1235 doi:10.1017/RDC.2018.95 (2018).
- 1236 32 Gimbutas, M. *The prehistory of eastern Europe*. (Peabody Museum, 1956).
- 1237 33 Fu, Q. *et al.* The genetic history of Ice Age Europe. *Nature* **534**, 200-205,  
1238 doi:10.1038/nature17993 (2016).
- 1239 34 Anthony, D. W. *et al.* The Eneolithic cemetery at Khvalynsk on the Volga River.  
1240 *Praehistorische Zeitschrift* **97**, 22-67, doi:10.1515/pz-2022-2034 (2022).
- 1241 35 Govedarica, B. & Manzura, I. The Giurgiulesti cemetery in chronological and cultural  
1242 context of Southeastern and Eastern Europe. *Eurasia Antiqua* **22**, 1-39 (2016).
- 1243 36 Penske, S. *et al.* Early contact between late farming and pastoralist societies in  
1244 southeastern Europe. *Nature* **620**, 358-365, doi:10.1038/s41586-023-06334-8 (2023).
- 1245 37 Patterson, N., Price, A. L. & Reich, D. Population Structure and Eigenanalysis. *PLOS*  
1246 *Genetics* **2**, e190, doi:10.1371/journal.pgen.0020190 (2006).
- 1247 38 Nikitin, A. G. I., S.; Culleton, B.J.; Potekhina, I.; Reich, D. New radiocarbon and stable  
1248 isotope data from the Usatove culture site of Mayaky in Ukraine. *SSRN Electronic*  
1249 *Journal*, doi:10.2139/ssrn.4236123 (2023).
- 1250 39 Skorobogatov, A. M. Pamyatniki Neolita I Eneolita v Ust'e Chernoi Kalitvy. *Trudy*  
1251 *Voronezhskogo Oblastnogo Kraevedcheskogo Muzeiya Vyp.* **3**, 47-53 (2019).
- 1252 40 Skorobogatov, A. M. & Smol'janinov, R. V. Srednestogovskie materialy v bassejne  
1253 Verhnego i Srednego Dona. *Rossiyskaya arkheologiya* **2013**, 126-136 (2013).
- 1254 41 Shishlina, N. I. *et al.* Paleoecology, Subsistence, and 14C Chronology of the Eurasian  
1255 Caspian Steppe Bronze Age. *Radiocarbon* **51**, 481-499,  
1256 doi:10.1017/S0033822200055879 (2009).
- 1257 42 Korenevskii, S. *Rozhdenie Kurgana [Origins of Kurgans]* (2012).

- 1258 43 Skourtanioti, E. *et al.* Genomic History of Neolithic to Bronze Age Anatolia, Northern  
1259 Levant, and Southern Caucasus. *Cell* **181**, 1158-1175.e1128,  
1260 doi:10.1016/j.cell.2020.04.044 (2020).
- 1261 44 Guarino-Vignon, P. *et al.* Genome-wide analysis of a collective grave from Mentesh  
1262 Tepe provides insight into the population structure of early neolithic population in the  
1263 South Caucasus. *Communications Biology* **6**, 319, doi:10.1038/s42003-023-04681-w  
1264 (2023).
- 1265 45 Lazaridis, I. *et al.* The genetic history of the Southern Arc: A bridge between West Asia  
1266 and Europe. *Science* **377**, eabm4247, doi:10.1126/science.abm4247 (2022).
- 1267 46 Altınışık, N. E. *et al.* A genomic snapshot of demographic and cultural dynamism in  
1268 Upper Mesopotamia during the Neolithic Transition. *Science Advances* **8**, eabo3609,  
1269 doi:10.1126/sciadv.abo3609.
- 1270 47 Lazaridis, I. *et al.* Genetic origins of the Minoans and Mycenaeans. *Nature* **548**, 214-218,  
1271 doi:10.1038/nature23310 (2017).
- 1272 48 Lazaridis, I. The evolutionary history of human populations in Europe. *Current Opinion*  
1273 *in Genetics & Development* **53**, 21-27, doi:<https://doi.org/10.1016/j.gde.2018.06.007>  
1274 (2018).
- 1275 49 Kloekhorst, A. in *The Indo-European Puzzle Revisited: Integrating Archaeology,*  
1276 *Genetics, and Linguistics* (eds Eske Willerslev, Guus Kroonen, & Kristian Kristiansen)  
1277 42-60 (Cambridge University Press, 2023).
- 1278 50 Kroonen, G., Barjamovic, G. & Peyrot, M. Linguistic supplement to Damgaard et al.  
1279 2018 : Early Indo-European languages, Anatolian, Tocharian and Indo-Iranian. (2018).  
1280 <<https://zenodo.org/doi/10.5281/zenodo.1240523>>.
- 1281 51 Egfjord, A. F.-H. *et al.* Genomic Steppe ancestry in skeletons from the Neolithic Single  
1282 Grave Culture in Denmark. *PLOS ONE* **16**, e0244872, doi:10.1371/journal.pone.0244872  
1283 (2021).
- 1284 52 Chintalapati, M., Patterson, N. & Moorjani, P. The spatiotemporal patterns of major  
1285 human admixture events during the European Holocene. *eLife* **11**, e77625,  
1286 doi:10.7554/eLife.77625 (2022).
- 1287 53 Fournier, R., Tsangalidou, Z., Reich, D. & Palamara, P. F. Haplotype-based inference of  
1288 recent effective population size in modern and ancient DNA samples. *Nature*  
1289 *Communications* **14**, 7945, doi:10.1038/s41467-023-43522-6 (2023).
- 1290 54 Ringbauer, H. *et al.* Accurate detection of identity-by-descent segments in human ancient  
1291 DNA. *Nature Genetics* **56**, 143-151, doi:10.1038/s41588-023-01582-w (2024).
- 1292 55 Fowler, C. *et al.* A high-resolution picture of kinship practices in an Early Neolithic  
1293 tomb. *Nature* **601**, 584-587, doi:10.1038/s41586-021-04241-4 (2022).
- 1294 56 Shishlina, N. *Reconstruction of the Bronze Age of the Caspian steppes: Life styles and*  
1295 *life ways of pastoral nomads*. Vol. 1876 (Archaeopress, 2008).
- 1296 57 Cassidy, L. M. *et al.* A dynastic elite in monumental Neolithic society. *Nature* **582**, 384-  
1297 388, doi:10.1038/s41586-020-2378-6 (2020).
- 1298 58 Olander, T. Indo-European cladistic nomenclature. **124**, 231-244, doi:doi:10.1515/if-  
1299 2019-0008 (2019).
- 1300 59 Anthony, D. W. & Ringe, D. The Indo-European Homeland from Linguistic and  
1301 Archaeological Perspectives. *Annual Review of Linguistics* **1**, 199-219,  
1302 doi:10.1146/annurev-linguist-030514-124812 (2015).



- 1303 60 Pronk, T. C. Indo-European secondary products terminology and the dating of Proto-  
1304 Indo-Anatolian. *Journal of Indo-European Studies* **49**, 141-170 (2022).
- 1305 61 Kassian, A. S. *et al.* Rapid radiation of the inner Indo-European languages: an advanced  
1306 approach to Indo-European lexicostatistics. *Linguistics* **59**, 949-979,  
1307 doi:doi:10.1515/ling-2020-0060 (2021).
- 1308 62 Allentoft, M. E. *et al.* Population genomics of Bronze Age Eurasia. *Nature* **522**, 167-172,  
1309 doi:10.1038/nature14507 (2015).
- 1310 63 Ringe, D., Warnow, T. & Taylor, A. Indo-European and Computational Cladistics.  
1311 *Transactions of the Philological Society* **100**, 59-129, doi:[https://doi.org/10.1111/1467-](https://doi.org/10.1111/1467-968X.00091)  
1312 [968X.00091](https://doi.org/10.1111/1467-968X.00091) (2002).
- 1313 64 Heggarty, P. *et al.* Language trees with sampled ancestors support a hybrid model for the  
1314 origin of Indo-European languages. *Science* **381**, eabg0818,  
1315 doi:10.1126/science.abg0818.
- 1316 65 Kroonen, G., Jakob, A., Palmér, A. I., van Sluis, P. & Wigman, A. Indo-European cereal  
1317 terminology suggests a Northwest Pontic homeland for the core Indo-European  
1318 languages. *PLOS ONE* **17**, e0275744, doi:10.1371/journal.pone.0275744 (2022).
- 1319 66 Kristiansen, K. in *Dispersals and Diversification: Linguistic and Archaeological*  
1320 *Perspectives on the Early Stages of Indo-European* Vol. 19 *Brill's Studies in Indo-*  
1321 *European Languages & Linguistics* (eds M. Serangeli & Thomas Olander) 157-165  
1322 (Brill, 2019).
- 1323 67 Fernandes, D. M. *et al.* The spread of steppe and Iranian-related ancestry in the islands of  
1324 the western Mediterranean. *Nature Ecology & Evolution* **4**, 334-345,  
1325 doi:10.1038/s41559-020-1102-0 (2020).
- 1326 68 Pinhasi, R., Fernandes, D. M., Sirak, K. & Cheronet, O. Isolating the human cochlea to  
1327 generate bone powder for ancient DNA analysis. *Nat Protoc* **14**, 1194-1205,  
1328 doi:10.1038/s41596-019-0137-7 (2019).
- 1329 69 Sirak, K. A. *et al.* A minimally-invasive method for sampling human petrous bones from  
1330 the cranial base for ancient DNA analysis. *Biotechniques* **62**, 283-289,  
1331 doi:10.2144/000114558 (2017).
- 1332 70 Damgaard, P. B. *et al.* Improving access to endogenous DNA in ancient bones and teeth.  
1333 *Sci Rep* **5**, 11184, doi:10.1038/srep11184 (2015).
- 1334 71 Sirak, K. *et al.* Human auditory ossicles as an alternative optimal source of ancient DNA.  
1335 *Genome research* **30**, 427-436, doi:10.1101/gr.260141.119 (2020).
- 1336 72 Dabney, J. *et al.* Complete mitochondrial genome sequence of a Middle Pleistocene cave  
1337 bear reconstructed from ultrashort DNA fragments. *Proceedings of the National Academy*  
1338 *of Sciences of the United States of America* **110**, 15758-15763,  
1339 doi:10.1073/pnas.1314445110 (2013).
- 1340 73 Korlević, P. *et al.* Reducing microbial and human contamination in DNA extractions  
1341 from ancient bones and teeth. *Biotechniques* **59**, 87-93, doi:10.2144/000114320 (2015).
- 1342 74 Rohland, N., Harney, E., Mallick, S., Nordenfelt, S. & Reich, D. Partial uracil-DNA-  
1343 glycosylase treatment for screening of ancient DNA. *Philos Trans R Soc Lond B Biol Sci*  
1344 **370**, 20130624, doi:10.1098/rstb.2013.0624 (2015).
- 1345 75 Rohland, N., Glocke, I., Aximu-Petri, A. & Meyer, M. Extraction of highly degraded  
1346 DNA from ancient bones, teeth and sediments for high-throughput sequencing. *Nat*  
1347 *Protoc* **13**, 2447-2461, doi:10.1038/s41596-018-0050-5 (2018).

- 1348 76 Prendergast, M. E. *et al.* Ancient DNA reveals a multistep spread of the first herders into  
1349 sub-Saharan Africa. *Science* **365**, doi:10.1126/science.aaw6275 (2019).
- 1350 77 Gansauge, M. T., Aximu-Petri, A., Nagel, S. & Meyer, M. Manual and automated  
1351 preparation of single-stranded DNA libraries for the sequencing of DNA from ancient  
1352 biological remains and other sources of highly degraded DNA. *Nat Protoc* **15**, 2279-  
1353 2300, doi:10.1038/s41596-020-0338-0 (2020).
- 1354 78 Maricic, T., Whitten, M. & Paabo, S. Multiplexed DNA sequence capture of  
1355 mitochondrial genomes using PCR products. *PloS one* **5**, e14004,  
1356 doi:10.1371/journal.pone.0014004 (2010).
- 1357 79 Fu, Q. *et al.* DNA analysis of an early modern human from Tianyuan Cave, China.  
1358 *Proceedings of the National Academy of Sciences of the United States of America* **110**,  
1359 2223-2227, doi:10.1073/pnas.1221359110 (2013).
- 1360 80 Fu, Q. *et al.* An early modern human from Romania with a recent Neanderthal ancestor.  
1361 *Nature* **524**, 216-219, doi:10.1038/nature14558 (2015).
- 1362 81 Rohland, N. *et al.* Three assays for in-solution enrichment of ancient human DNA at  
1363 more than a million SNPs. *Genome research* **32**, 2068-2078, doi:10.1101/gr.276728.122  
1364 (2022).
- 1365 82 Lipson, M. *et al.* Parallel palaeogenomic transects reveal complex genetic history of early  
1366 European farmers. *Nature* **551**, 368-372, doi:10.1038/nature24476 (2017).
- 1367 83 Behar, D. M. *et al.* A "Copernican" reassessment of the human mitochondrial DNA tree  
1368 from its root. *Am J Hum Genet* **90**, 675-684, doi:10.1016/j.ajhg.2012.03.002 (2012).
- 1369 84 Li, H. & Durbin, R. Fast and accurate short read alignment with Burrows–Wheeler  
1370 transform. *Bioinformatics* **25**, 1754-1760, doi:10.1093/bioinformatics/btp324 (2009).
- 1371 85 Fu, Q. *et al.* A Revised Timescale for Human Evolution Based on Ancient Mitochondrial  
1372 Genomes. *Current Biology* **23**, 553-559, doi:<https://doi.org/10.1016/j.cub.2013.02.044>  
1373 (2013).
- 1374 86 Korneliussen, T. S., Albrechtsen, A. & Nielsen, R. ANGSD: Analysis of Next Generation  
1375 Sequencing Data. *BMC Bioinformatics* **15**, 356, doi:10.1186/s12859-014-0356-4 (2014).
- 1376 87 Skoglund, P. *et al.* Separating endogenous ancient DNA from modern day contamination  
1377 in a Siberian Neandertal. *Proceedings of the National Academy of Sciences* **111**, 2229,  
1378 doi:10.1073/pnas.1318934111 (2014).
- 1379 88 Li, H. *et al.* The Sequence Alignment/Map format and SAMtools. *Bioinformatics* **25**,  
1380 2078-2079, doi:10.1093/bioinformatics/btp352 (2009).
- 1381 89 Weissensteiner, H. *et al.* HaploGrep 2: mitochondrial haplogroup classification in the era  
1382 of high-throughput sequencing. *Nucleic Acids Res* **44**, W58-63, doi:10.1093/nar/gkw233  
1383 (2016).
- 1384 90 van Oven, M. & Kayser, M. Updated comprehensive phylogenetic tree of global human  
1385 mitochondrial DNA variation. *Human Mutation* **30**, E386-E394,  
1386 doi:10.1002/humu.20921 (2009).
- 1387 91 Shinde, V. *et al.* An Ancient Harappan Genome Lacks Ancestry from Steppe Pastoralists  
1388 or Iranian Farmers. *Cell* **179**, doi:10.1016/j.cell.2019.08.048 (2019).
- 1389 92 Harney, É. *et al.* Ancient DNA from Chalcolithic Israel reveals the role of population  
1390 mixture in cultural transformation. *Nature Communications* **9**, 3336, doi:10.1038/s41467-  
1391 018-05649-9 (2018).

- 1392 93 Rivollat, M. *et al.* Ancient genome-wide DNA from France highlights the complexity of  
1393 interactions between Mesolithic hunter-gatherers and Neolithic farmers. *Science*  
1394 *Advances* **6**, eaaz5344, doi:10.1126/sciadv.aaz5344 (2020).
- 1395 94 Reich, D., Thangaraj, K., Patterson, N., Price, A. L. & Singh, L. Reconstructing Indian  
1396 population history. *Nature* **461**, 489-494, doi:10.1038/nature08365 (2009).
- 1397 95 Adamov, D., Gurianov, V. M., Karzhavin, S., Tagankin, V. & Urasin, V. Defining a New  
1398 Rate Constant for Y-Chromosome SNPs based on Full Sequencing Data. *Russian Journal*  
1399 *of Genetic Genealogy* **7**, 1920-2997 (2015).
- 1400 96 Sinnott, R. W. Virtues of the Haversine. *Sky and telescope* **68**, 158 (1984).
- 1401 97 Charlesworth, B. Effective population size and patterns of molecular evolution and  
1402 variation. *Nature Reviews Genetics* **10**, 195-205, doi:10.1038/nrg2526 (2009).
- 1403 98 Fenner, J. N. Cross-cultural estimation of the human generation interval for use in  
1404 genetics-based population divergence studies. *Am J Phys Anthropol* **128**, 415-423,  
1405 doi:10.1002/ajpa.20188 (2005).

# Roots of Caucasus-Lower Volga people

The people of the homeland of the Proto-Indo-Anatolians (1) had ancestry from the Caucasus Neolithic (Aknashen) and Lower Volga Eneolithic (Berezhnovka)

Caucasus hunter-gatherer ancestry was common to both groups. In the Lower Volga Eneolithic there was also Eastern hunter-gatherer (Lebyazhinka) and Central Asian-Siberian (Tutkaul) ancestry. In the Caucasus Neolithic there was also ancestry from the Neolithic people of Anatolia-Mesopotamia (Çayönü).

Pre-Indo-Anatolian languages were spoken by at least some of these diverse ancestors, but living Indo-European languages trace their origins to the Yamnaya expansion ca. 3300BCE out of (3) and the earlier Indo-Anatolian expansion ca. 4400-4000BCE out of (1)

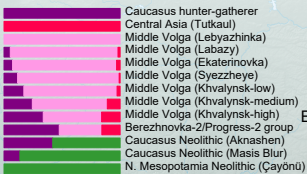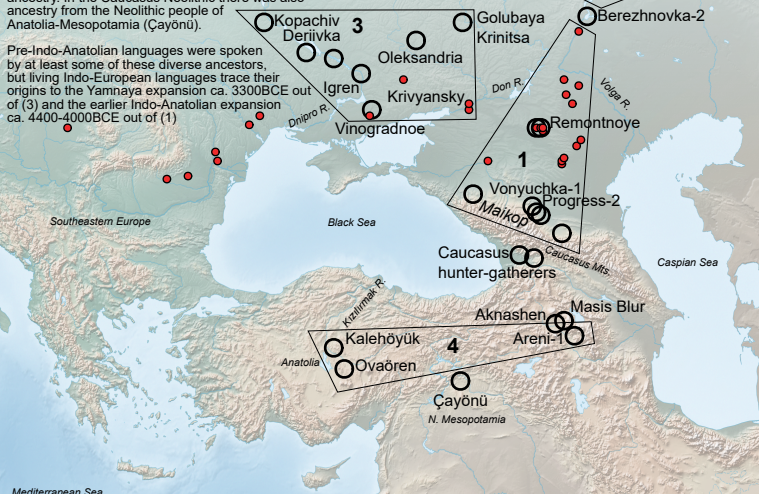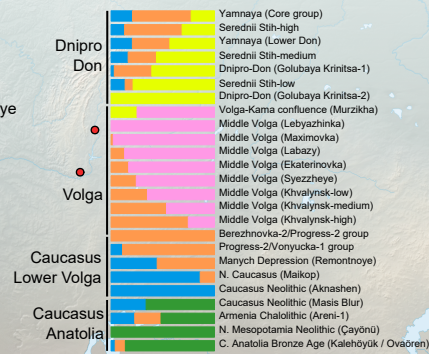

## Expansions of Caucasus-Lower Volga people

Eneolithic people of the North Caucasus-Lower Volga region (1) had a mix of Caucasus Neolithic (Aknashen) and Lower Volga Eneolithic (Berezhnovka) ancestry. Migrations from (1) to the Volga (2), Dnipro-Don (3) and Caucasus-Anatolia (4) regions spread one or both of these ancestries, admixing in (2) with Eastern hunter-gatherers (Lebyazhinka), in (3) with Dnipro-Don hunter-gatherers, and in (4) with Caucasus-Mesopotamian (Masis Blur, Çayönü) populations.

The Yamnaya were formed ca. 4000BCE in the Serednii Stih cultural context of the Dnipro-Don area (3) before expanding ca. 3300BCE across the steppe. Anatolian speakers of Central Anatolia (4) living ca. 2750-1500BCE shared with the Yamnaya ancestry from area (1).

The Proto-Indo-Anatolian homeland was thus probably in the North Caucasus-Lower Volga area (1 and environs). Migrations to the west (3) and south (4) ca. 4400-4000BCE split PIA into the Proto-Indo-European languages (spoken by the Yamnaya) and Proto-Anatolian languages (spoken in Bronze Age Central Anatolia)

- Core Yamnaya sampling locations
- Other sites of interest



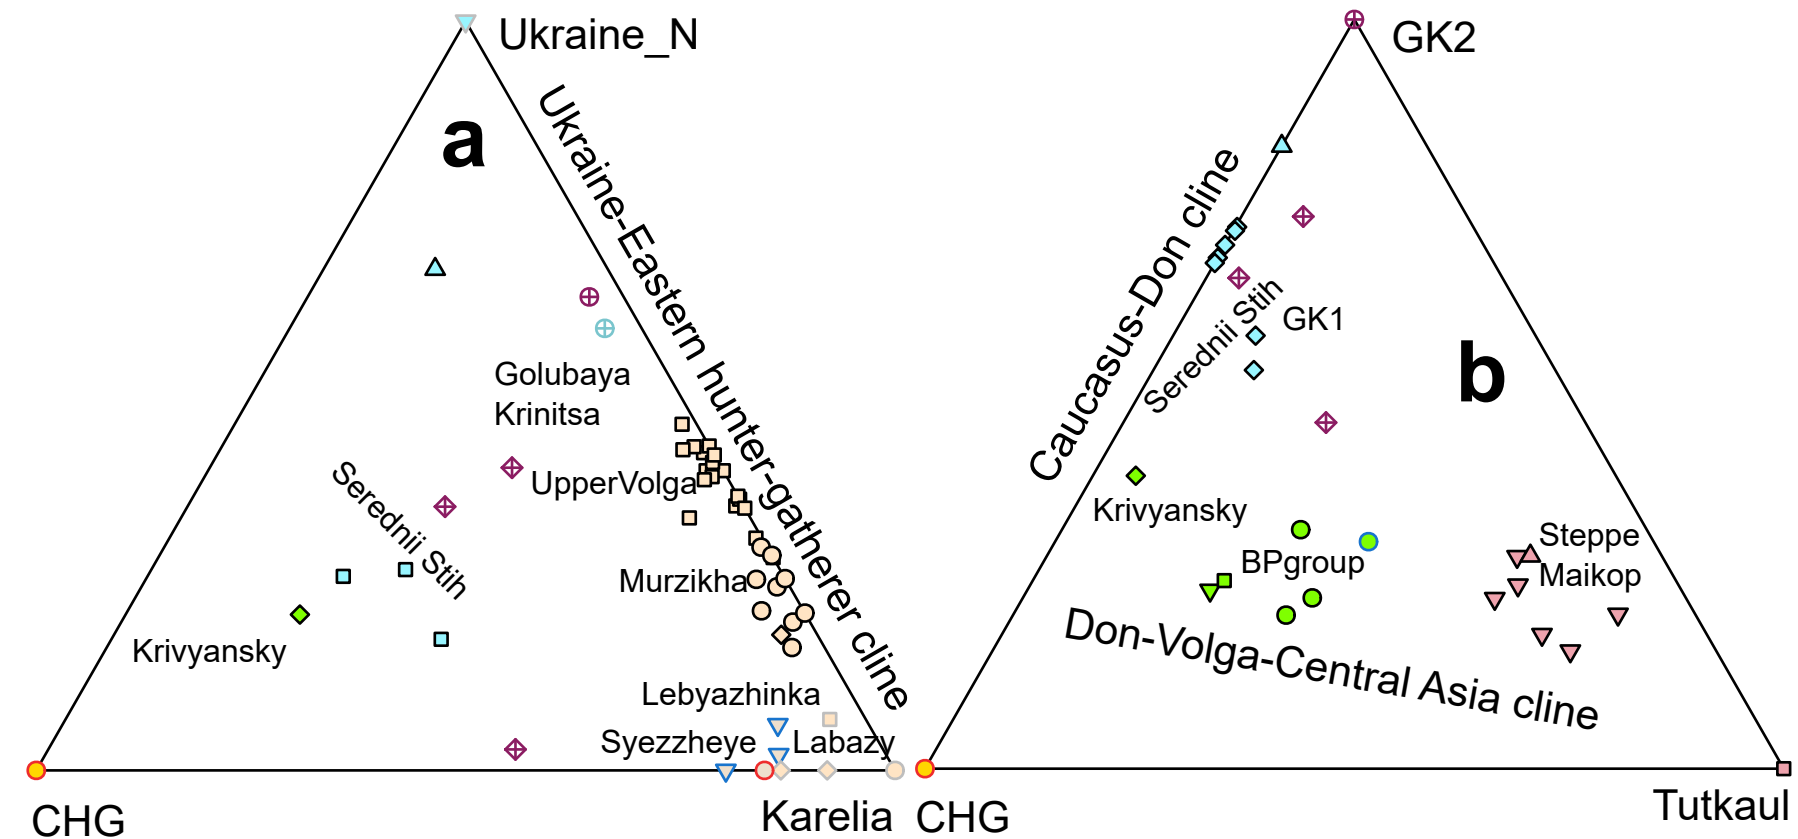

bioRxiv preprint doi: <https://doi.org/10.1101/2024.04.17.589597>; this version posted April 18, 2024. The copyright holder for this preprint (which was not certified by peer review) is the author/funder, who has granted bioRxiv a license to display the preprint in perpetuity. It is made available under aCC-BY-NC-ND 4.0 International license.

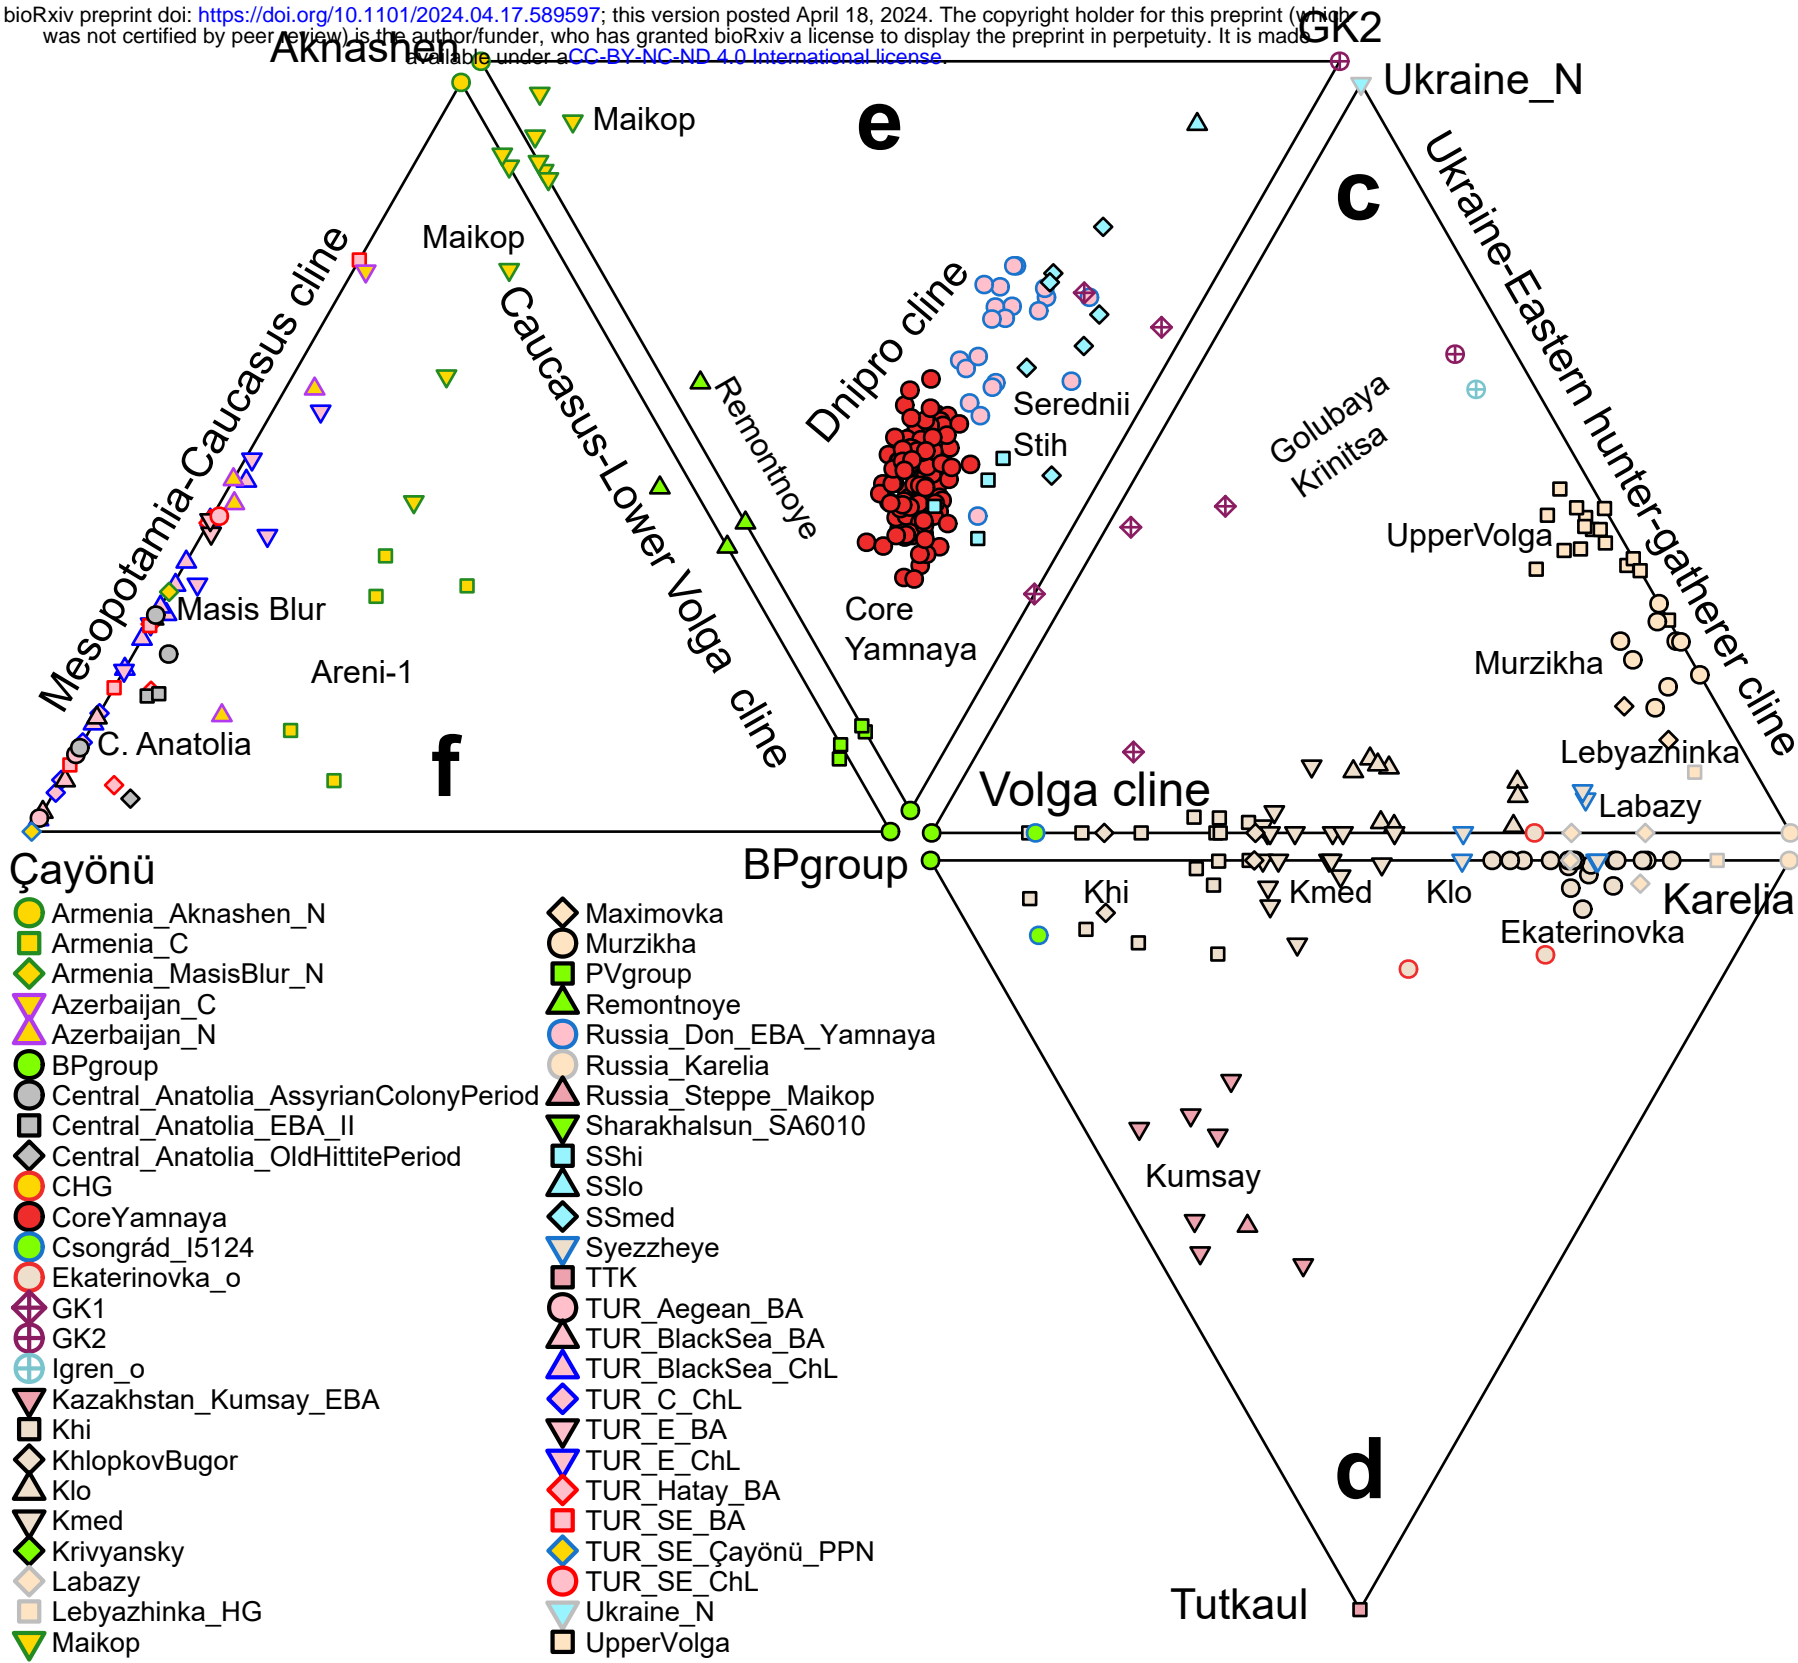

- Armenia\_Aknashen\_N
- Armenia\_C
- ◆ Armenia\_MasisBlur\_N
- ▼ Azerbaijan\_C
- ▲ Azerbaijan\_N
- BPgroup
- Central\_Anatolia\_AssyrianColonyPeriod
- Central\_Anatolia\_EBA\_II
- ◆ Central\_Anatolia\_OldHittitePeriod
- CHG
- CoreYamnaya
- Csongrád\_I5124
- Ekaterinovka\_o
- ◆ GK1
- ◆ GK2
- Igren\_o
- ▼ Kazakhstan\_Kumsay\_EBA
- Khi
- ◆ KhlopkovBugor
- ▲ Klo
- ▼ Kmed
- ◆ Krivyansky
- ◆ Labazy
- Lebyzhinka\_HG
- ▼ Maikop
- ◆ Maximovka
- Murzikha
- PVgroup
- ▲ Remontnoye
- Russia\_Don\_EBA\_Yamnaya
- Russia\_Karelia
- ▲ Russia\_Steppe\_Maikop
- ▼ Sharakhalsun\_SA6010
- SShi
- ▲ SSlO
- ◆ SSmEd
- ▼ Syezzheye
- TTK
- TUR\_Aegean\_BA
- ▲ TUR\_BlackSea\_BA
- ▲ TUR\_BlackSea\_ChL
- ◆ TUR\_C\_ChL
- ▼ TUR\_E\_BA
- ▼ TUR\_E\_ChL
- ◆ TUR\_Hatay\_BA
- TUR\_SE\_BA
- ◆ TUR\_SE\_Çayönü\_PPN
- TUR\_SE\_ChL
- ▼ Ukraine\_N
- UpperVolga

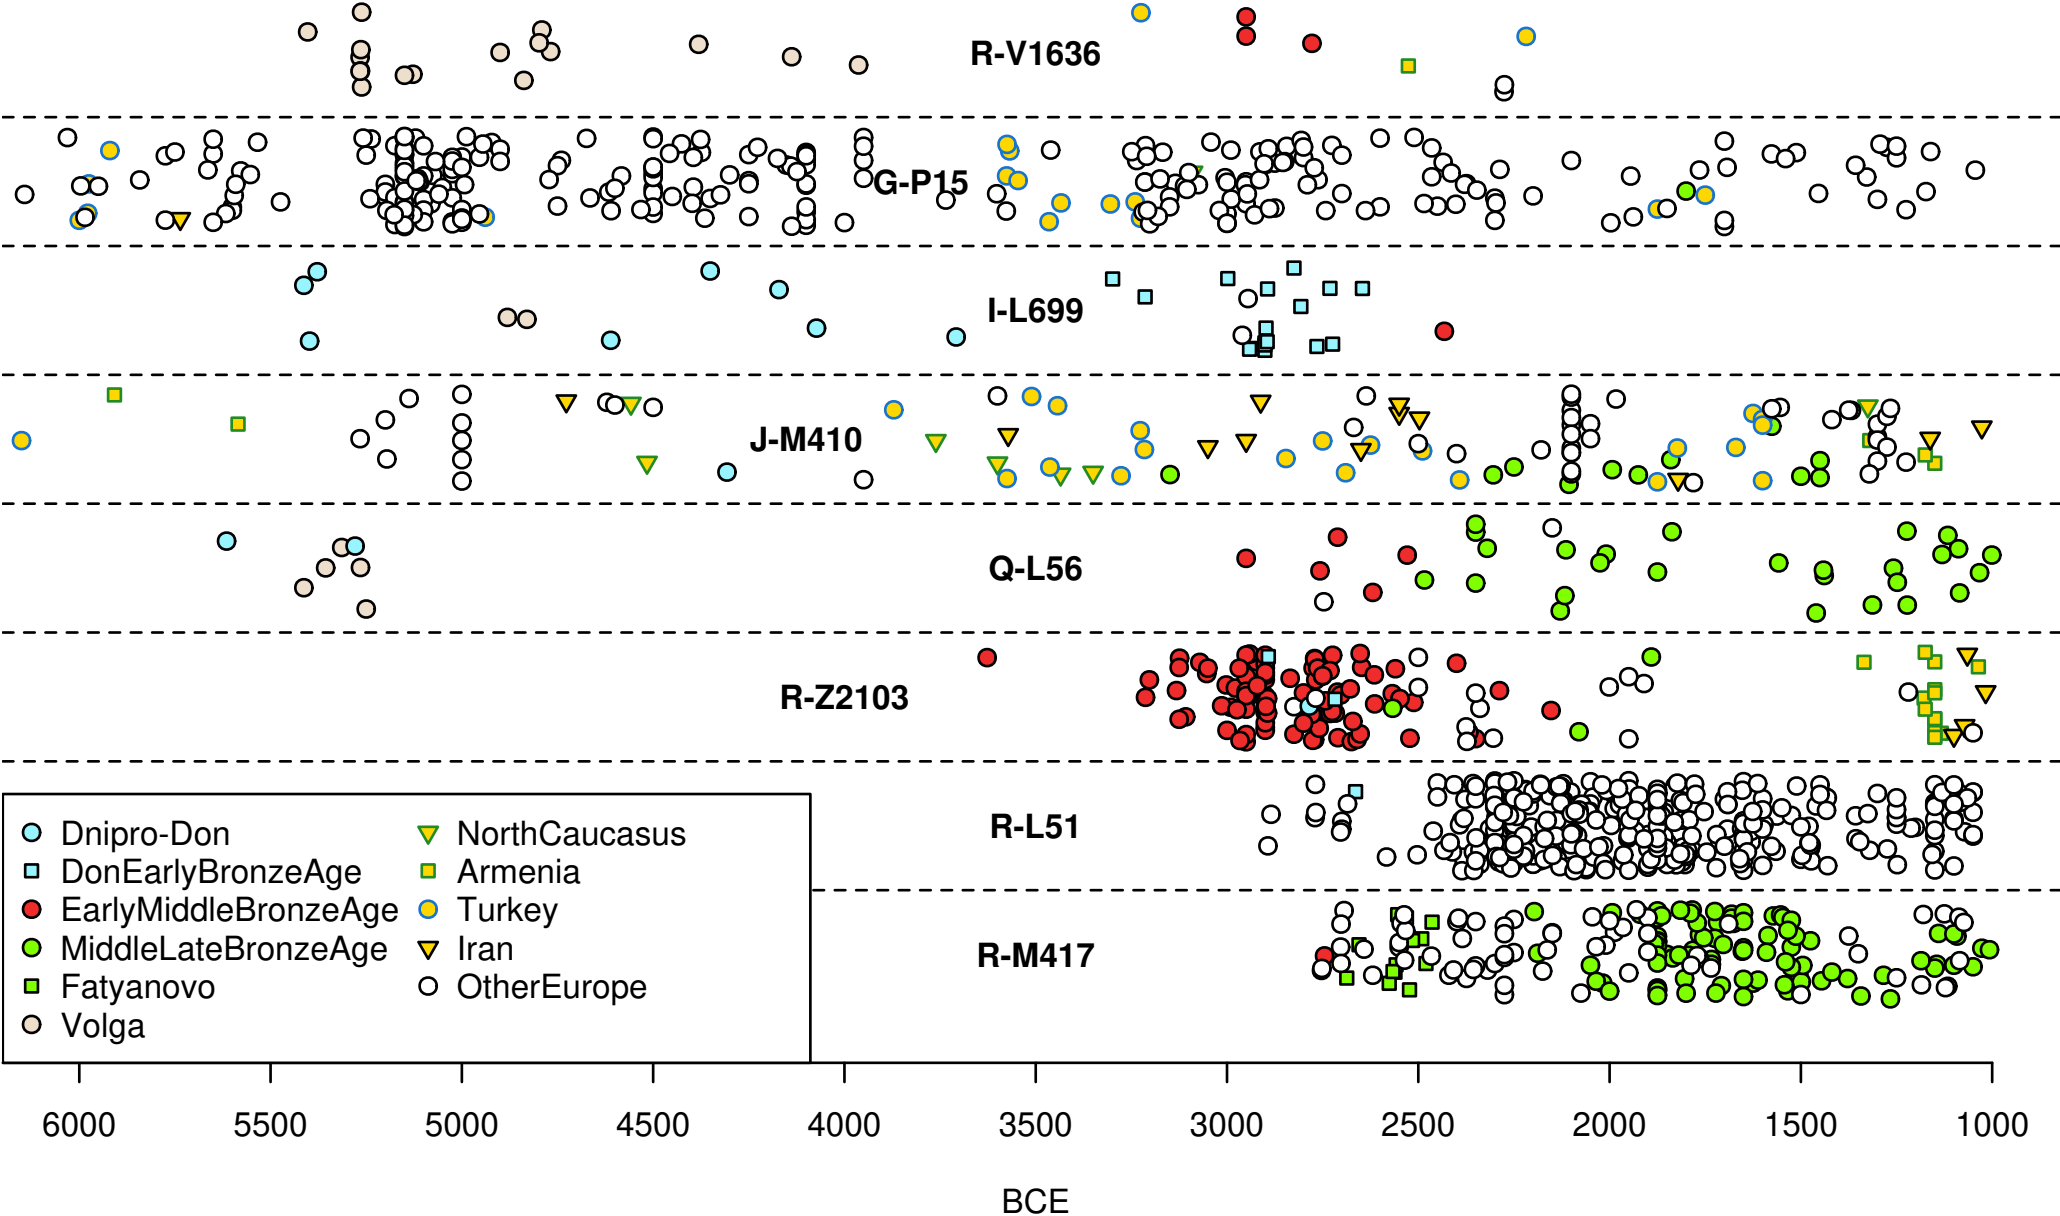

a

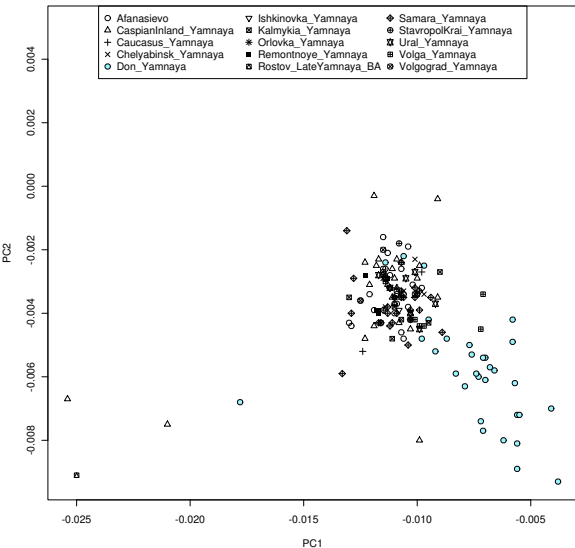

b

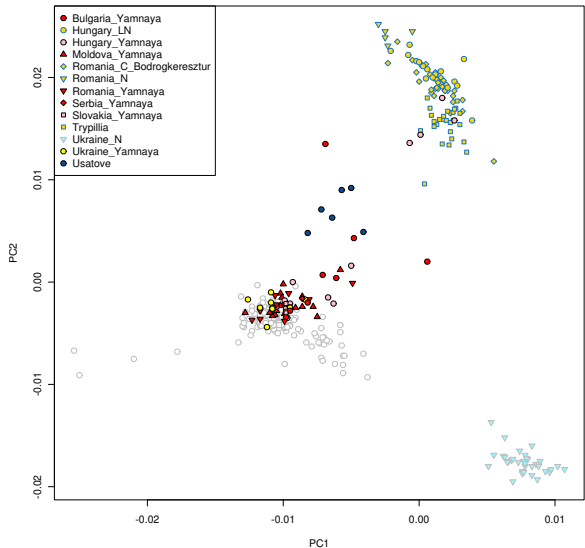



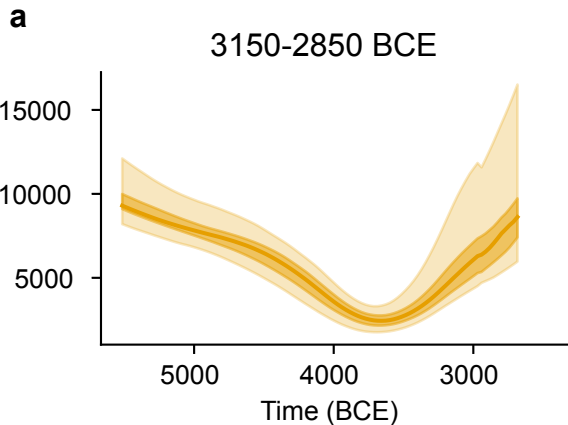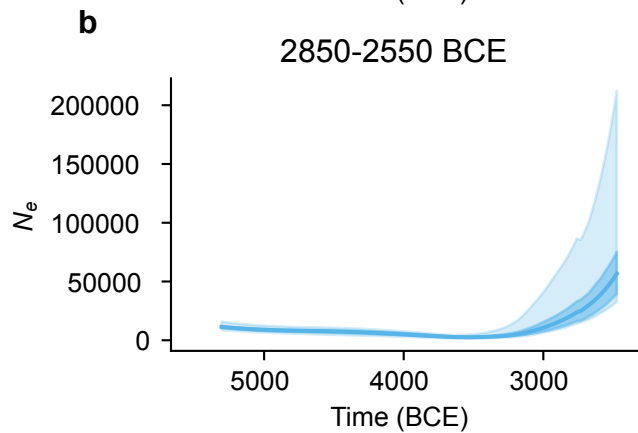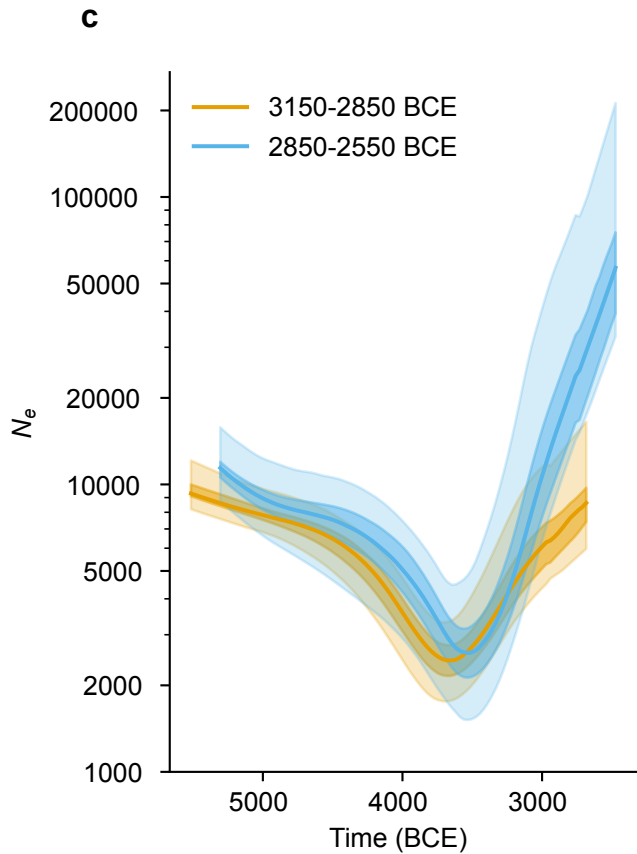

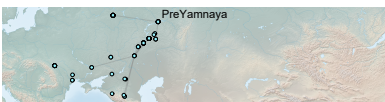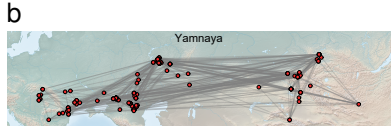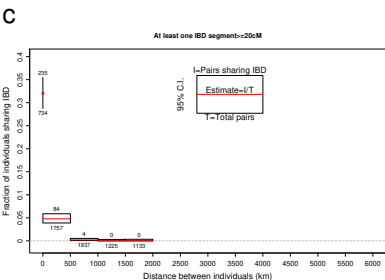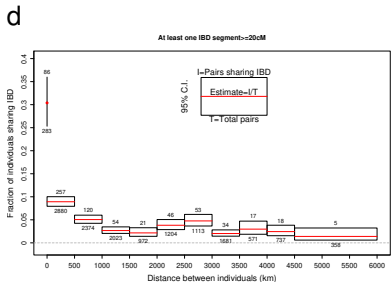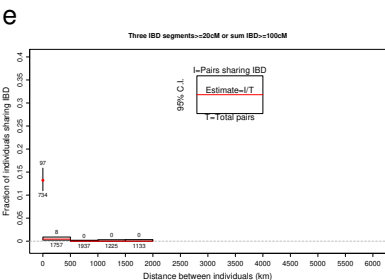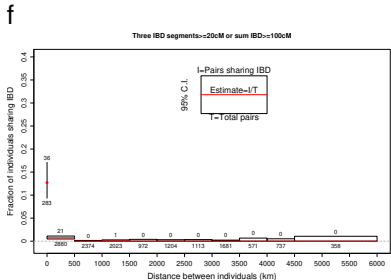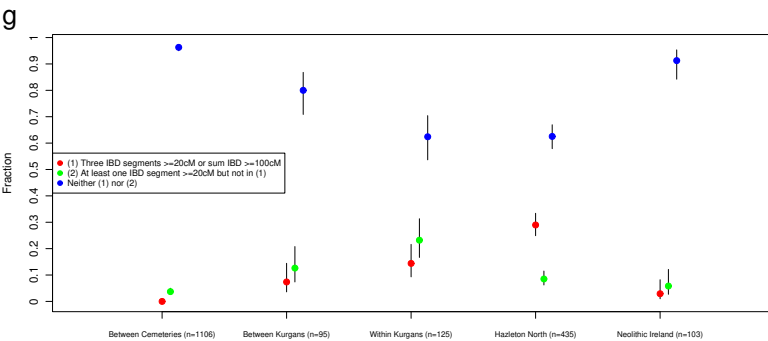

Source: https://www.biorxiv.org/content/10.1101/2024.04.17.589597v1.full.pdf
